# Supplementary material for: Copper-catalyzed intramolecular aryl-bicyclization of diynes with diaryliodonium salts via vinyl cations
Source: Royal Society of Chemistry journal article supplement (doi:10.1039/c6cc05735g), 2016-01-01
Supplement: c6cc05735g1.pdf [file c6cc05735g1.pdf]

## Copper-catalyzed intramolecular aryl-bicyclization of diynes with diaryliodonium salts via vinyl cations

Guohua Wang, Chao Chen<sup>\*</sup>, Jing Peng

<sup>†</sup> Key Laboratory of Bioorganic Phosphorus Chemistry & Chemical Biology (Ministry of Education), Department of Chemistry, Tsinghua University, Beijing 100084, China

E-mail: [chenchao01@mails.tsinghua.edu.cn](mailto:chenchao01@mails.tsinghua.edu.cn)

### Table of contents:

|                                                                    |           |
|--------------------------------------------------------------------|-----------|
| 1. General information.....                                        | S2        |
| 2. Synthesis of starting materials <b>1</b> .....                  | S3        |
| 3. Characterization data of starting materials <b>1</b> .....      | S4 - S8   |
| 4. NMR spectra of starting materials <b>1</b> .....                | S9 - S24  |
| 5. General procedure for the synthesis of polycyclic products..... | S25       |
| 6. Characterization data of polycyclic products.....               | S26- S38  |
| 7. NMR spectra of polycyclic products.....                         | S39 - S66 |
| 8. X-ray single crystallographic data of compound <b>3ae</b> ..... | S67       |
| 9. References.....                                                 | S68       |

## 1. General information

All the reactions were carried out in oven dried screw capped tube with a Teflon lined septum under N<sub>2</sub> atmosphere. Diynes reagents were prepared according to the literature.<sup>1</sup> Diaryliodonium triflate reagents were synthesized according to the literatures.<sup>2</sup> All of the solvents were fresh distilled according to standard method. Column chromatography was performed on silica gel (particle size 10-40 μm, Ocean Chemical Factory of Qingdao, China). <sup>1</sup>H NMR and <sup>13</sup>C NMR spectras were recorded on an AL -300MHz, AL -400MHz or AL-600MHz spectrometer at ambient temperature with CDCl<sub>3</sub> as the solvent. <sup>1</sup>H NMR spectra are reported as follows: chemical shift in ppm (δ) relative to the chemical shift of CDCl<sub>3</sub> at 7.26 ppm, integration, multiplicities (s = singlet, d = doublet, t = triplet, q = quartet, m = multiplet) and coupling constants (Hz). <sup>13</sup>C NMR spectra are reported in ppm (δ) relative to the central line of triplet for CDCl<sub>3</sub> at 77.16 ppm. Two dimensional NMR spectras were recorded on an AL-600MHz spectrometer at ambient temperature with CDCl<sub>3</sub> as the solvent. The reaction progress was monitored by GC-MS if applicable.

## 2. Synthesis of starting material **1**

### 2.1 General procedure

To a solution of the respective diyne (10 mmol) and 1-iodo-4-methylbenzene (30 mmol) in NEt<sub>3</sub> (60 mL), Pd(PPh<sub>3</sub>)<sub>2</sub>Cl<sub>2</sub> (421 mg), CuI (191 mg) and PPh<sub>3</sub> (185 mg) were added at ambient temperature. The reaction mixture was stirred at room temperature (60 °C for **1j**) under nitrogen for 12-24 h. Then the suspension was filtered through a 3 cm thick layer of Celite, and the Celite was rinsed well with ethyl acetate (50 mL). The solvents of the filtrate were removed under reduced pressure, and the residue was subjected to chromatography on silica gel. Elution with hexane/ethyl acetate afforded the coupling product.

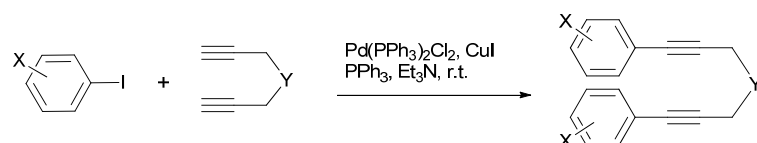

| X                 | Y                               | Time (h) | Product   | Yield |
|-------------------|---------------------------------|----------|-----------|-------|
| 4-CH <sub>3</sub> | (CH <sub>2</sub> ) <sub>2</sub> | 18       | <b>1a</b> | 80%   |
| 4-CH <sub>3</sub> | CH <sub>2</sub>                 | 12       | <b>1b</b> | 75%   |
| 4-F               | (CH <sub>2</sub> ) <sub>2</sub> | 24       | <b>1c</b> | 80%   |
| 4-F               | CH <sub>2</sub>                 | 24       | <b>1d</b> | 75%   |
| 4-Cl              | (CH <sub>2</sub> ) <sub>2</sub> | 24       | <b>1e</b> | 71%   |
| 4-Cl              | CH <sub>2</sub>                 | 24       | <b>1f</b> | 75%   |
| 4-Br              | (CH <sub>2</sub> ) <sub>2</sub> | 24       | <b>1g</b> | 63%   |
| 4-Br              | CH <sub>2</sub>                 | 24       | <b>1h</b> | 60%   |
| 4-COOMe           | CH <sub>2</sub>                 | 24       | <b>1i</b> | 30%   |
| 2-F               | CH <sub>2</sub>                 | 24       | <b>1j</b> | 35%   |
| 3-Br              | CH <sub>2</sub>                 | 24       | <b>1k</b> | 81%   |
| 4-CH <sub>3</sub> | O                               | 20       | <b>1l</b> | 99%   |
| 4-CH <sub>3</sub> | C(COOMe) <sub>2</sub>           | 24       | <b>1m</b> | 93%   |
| 4-Meo             | CH <sub>2</sub>                 | 24       | <b>1n</b> | 67%   |

### 2.2 Synthesis of unsymmetrical diyne **1o**.

A mixture of methyl 4-iodobenzoate (2.62 g, 10 mmol), CuI (98 mg, 0.5 mmol), PdCl<sub>2</sub>(PPh<sub>3</sub>)<sub>2</sub> (420 mg, 0.6 mmol), 1,6-heptadiyne (1.8 mL, 15.67 mmol) and 40 mL of triethylamine was stirred at 60 °C for 24 h. After filtration and solvent removal, the crude product was purified on a silica gel column using PE/EA as an eluent to give **1p** as a colorless oil (985 mg, 4.4 mmol, 44%). A mixture of **1p** (452 mg, 2 mmol), 1-iodo-4-methylbenzene (654 mg, 3 mmol), CuI (38 mg, 0.2 mmol), PdCl<sub>2</sub>(PPh<sub>3</sub>)<sub>2</sub> (84.2 mg, 0.12 mmol) and PPh<sub>3</sub> (37 mg, 0.14 mmol) in 5 mL triethylamine was stirred for 24 h at RT. After removal of the volatile components under reduced pressure, the residue was subjected to silica gel column chromatography (PE/EA) to afford **1o** as white solid (452 mg, 72%).

### 3. Characterization data of starting materials 1

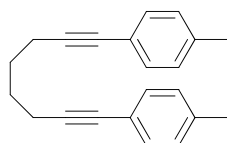

**1,8-di-*p*-tolyl-octa-1,7-diyne 1a:** white solid, melting point: 89 °C.

<sup>1</sup>H NMR (400 MHz, CHLOROFORM-D) δ 7.29 (d, *J* = 8.0 Hz, 4H), 7.08 (d, *J* = 8.0 Hz, 4H), 2.46 (t, *J* = 5.8 Hz, 4H), 2.32 (s, 6H), 1.81 - 1.74 (m, 4H).

<sup>13</sup>C NMR (101 MHz, CHLOROFORM-D) δ 137.6(2×C), 131.6(4×CH), 129.1(4×CH), 121.0(2×C), 89.2(2×C≡C), 81.1(2×C≡C), 28.1(2×CH<sub>2</sub>), 21.5(2×CH<sub>2</sub>), 19.2(2×CH<sub>3</sub>).

ESI-HRMS: *m/z* calcd for C<sub>22</sub>H<sub>22</sub> [M+H]<sup>+</sup>: 287.1794; found: 287.1796.

GC-MS *m/z*: 286

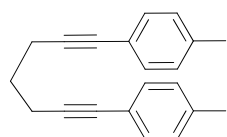

**1,7-di-*p*-tolyl-hepta-1,6-diyne 1b:** white solid, melting point: 47 °C.

<sup>1</sup>H NMR (400 MHz, CHLOROFORM-D) δ 7.29 (d, *J* = 8.0 Hz, 4H), 7.08 (d, *J* = 8.0 Hz, 4H), 2.57 (t, *J* = 7.0 Hz, 4H), 2.32 (s, 6H), 1.94 - 1.84 (m, 2H).

<sup>13</sup>C NMR (101 MHz, CHLOROFORM-D) δ 137.7(2×C), 131.6(4×CH), 129.1(4×CH), 120.9(2×C), 88.6(2×C≡C), 81.4(2×C≡C), 28.3, 21.6(2×CH<sub>2</sub>), 18.9(2×CH<sub>3</sub>).

ESI-HRMS: *m/z* calcd for C<sub>21</sub>H<sub>20</sub> [M+H]<sup>+</sup>: 273.1638; found: 273.1637.

GC-MS *m/z*: 272

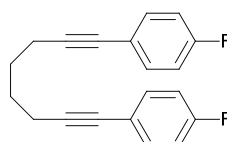

**1,8-bis(4-fluorophenyl)octa-1,7-diyne 1c:** white solid, melting point: 72 °C.

<sup>1</sup>H NMR (301 MHz, CHLOROFORM-D) δ 7.41 - 7.34 (m, 2H), 7.02 - 6.92 (m, 2H), 2.46 (t, *J* = 6.2 Hz, 4H), 1.83 - 1.73 (m, 4H).

<sup>13</sup>C NMR (76 MHz, CHLOROFORM-D) δ 162.2 (d, *J* = 248.2 Hz, 2×C), 133.5 (d, *J* = 8.3 Hz, 4×CH), 120.1 (d, *J* = 3.4 Hz, 2×C), 115.5 (d, *J* = 22.0 Hz, 4×CH) 89.5(2×C≡C), 80.0(2×C≡C), 28.0(2×CH<sub>2</sub>), 19.1(2×CH<sub>2</sub>).

ESI-HRMS: *m/z* calcd for C<sub>20</sub>H<sub>16</sub>F<sub>2</sub> [M+H]<sup>+</sup>: 295.1293; found: 295.1292.

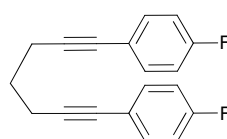

**1,7-bis(4-fluorophenyl)hepta-1,6-diyne 1d:** oil.

$^1\text{H}$  NMR (301 MHz, CHLOROFORM-D)  $\delta$  7.50 - 7.30 (m, 4H), 7.13 - 6.85 (m, 4H), 2.58 (t,  $J$  = 7.0 Hz, 4H), 1.96 - 1.83 (m, 2H).

$^{13}\text{C}$  NMR (76 MHz, CHLOROFORM-D)  $\delta$  162.2 (d,  $J$  = 248.4 Hz,  $2\times\text{C}$ ), 133.5 (d,  $J$  = 8.2 Hz,  $4\times\text{CH}$ ), 119.9 (d,  $J$  = 3.4 Hz,  $2\times\text{C}$ ), 115.5 (d,  $J$  = 21.9 Hz,  $4\times\text{CH}$ ), 88.8( $2\times\text{C}\equiv\text{C}$ ), 80.3( $2\times\text{C}\equiv\text{C}$ ), 28.0, 18.7( $2\times\text{CH}_2$ ).

ESI-HRMS:  $m/z$  calcd for  $\text{C}_{19}\text{H}_{14}\text{F}_2$   $[\text{M}+\text{H}]^+$ : 281.1136; found: 281.1134.

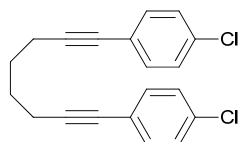

**1,8-bis(4-chlorophenyl)octa-1,7-diyne 1e**: white solid, melting point: 90 °C.

$^1\text{H}$  NMR (400 MHz, CHLOROFORM-D)  $\delta$  7.30 (d,  $J$  = 8.5 Hz, 4H), 7.24 (d,  $J$  = 8.5 Hz, 4H), 2.45 (t,  $J$  = 5.7 Hz, 4H), 1.81 - 1.73 (m, 4H).

$^{13}\text{C}$  NMR (101 MHz, CHLOROFORM-D)  $\delta$  133.7( $2\times\text{C}$ ), 132.9( $4\times\text{CH}$ ), 128.7( $4\times\text{CH}$ ), 122.5( $2\times\text{C}$ ), 91.0( $2\times\text{C}\equiv\text{C}$ ), 80.1( $2\times\text{C}\equiv\text{C}$ ), 27.9( $2\times\text{CH}_2$ ), 19.2( $2\times\text{CH}_2$ ).

ESI-HRMS:  $m/z$  calcd for  $\text{C}_{20}\text{H}_{16}\text{Cl}_2$   $[\text{M}+\text{H}]^+$ : 327.0702; found: 327.0703.

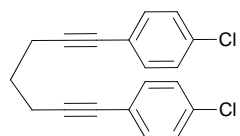

**1,7-bis(4-chlorophenyl)hepta-1,6-diyne 1f**: white solid, melting point: 53 °C.

$^1\text{H}$  NMR (400 MHz, CHLOROFORM-D)  $\delta$  7.34 - 7.29 (m, 4H), 7.27 - 7.22 (m, 4H), 2.57 (t,  $J$  = 7.0 Hz, 4H), 1.94 - 1.84 (m, 2H).

$^{13}\text{C}$  NMR (101 MHz, CHLOROFORM-D)  $\delta$  133.8( $2\times\text{C}$ ), 132.9( $4\times\text{CH}$ ), 128.7( $4\times\text{CH}$ ), 122.4( $2\times\text{C}$ ), 90.3( $2\times\text{C}\equiv\text{C}$ ), 80.4( $2\times\text{C}\equiv\text{C}$ ), 27.9, 18.8( $2\times\text{CH}_2$ ).

ESI-HRMS:  $m/z$  calcd for  $\text{C}_{19}\text{H}_{14}\text{Cl}_2$   $[\text{M}+\text{H}]^+$ : 313.0545; found: 313.0543.

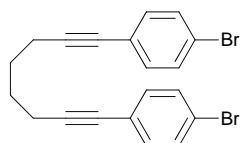

**1,8-bis(4-bromophenyl)octa-1,7-diyne 1g**: white solid, melting point: 95 °C.

$^1\text{H}$  NMR (301 MHz, CHLOROFORM-D)  $\delta$  7.46 - 7.36 (m, 4H), 7.28 - 7.23 (m, 4H), 2.45 (t,  $J$  = 6.0 Hz, 4H), 1.82 - 1.73 (m, 4H).

$^{13}\text{C}$  NMR (76 MHz, CHLOROFORM-D)  $\delta$  133.2( $4\times\text{CH}$ ), 131.6( $4\times\text{CH}$ ), 123.0( $2\times\text{C}$ ), 121.8( $2\times\text{C}$ ), 91.2( $2\times\text{C}\equiv\text{C}$ ), 80.1( $2\times\text{C}\equiv\text{C}$ ), 27.9( $2\times\text{CH}_2$ ), 19.2( $2\times\text{CH}_2$ ).

ESI-HRMS:  $m/z$  calcd for  $\text{C}_{20}\text{H}_{16}\text{Br}_2$   $[\text{M}+\text{H}]^+$ : 416.9672; found: 416.9673.

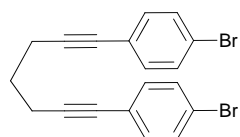

**1,7-bis(4-bromophenyl)hepta-1,6-diyne 1h:** white solid, melting point: 63 °C.

<sup>1</sup>H NMR (301 MHz, CHLOROFORM-D) δ 7.41 (d, *J* = 8.0 Hz, 4H), 7.25 (d, *J* = 8.0 Hz, 4H), 2.57 (t, *J* = 7.0 Hz, 4H), 1.97 - 1.83 (m, 2H).

<sup>13</sup>C NMR (76 MHz, CHLOROFORM-D) δ 133.2(4×CH), 131.6(4×CH), 122.9(2×C), 121.9(2×C), 90.5(2×C≡C), 80.5(2×C≡C), 27.8, 18.8(2×CH<sub>2</sub>).

ESI-HRMS: *m/z* calcd for C<sub>19</sub>H<sub>14</sub>Br<sub>2</sub> [M+H]<sup>+</sup>: 402.9515; found: 402.9516.

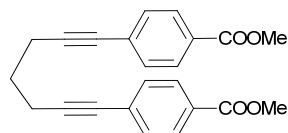

**dimethyl 4,4'-(hepta-1,6-diyne-1,7-diyl)dibenzoate 1i:** white solid, melting point: 105 °C.

<sup>1</sup>H NMR (400 MHz, CHLOROFORM-D) δ 7.96 (d, *J* = 8.5 Hz, 4H), 7.45 (d, *J* = 8.5 Hz, 4H), 3.91 (s, 6H), 2.63 (t, *J* = 7.0 Hz, 4H), 1.98 - 1.89 (m, 2H).

<sup>13</sup>C NMR (101 MHz, CHLOROFORM-D) δ 166.8(2×C=O), 131.7(4×CH), 129.6(4×CH), 129.2(2×C), 128.7(2×C), 92.6(2×C≡C), 81.0(2×C≡C), 52.3(2×OCH<sub>3</sub>), 27.7, 18.9(2×CH<sub>2</sub>).

ESI-HRMS: *m/z* calcd for C<sub>23</sub>H<sub>20</sub>O<sub>4</sub> [M+H]<sup>+</sup>: 361.1434; found: 361.1436.

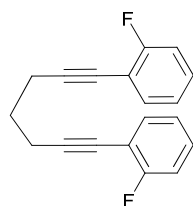

**1,7-bis(2-fluorophenyl)hepta-1,6-diyne 1j:** oil.

<sup>1</sup>H NMR (400 MHz, CHLOROFORM-D) δ 7.44 - 7.35 (m, 2H), 7.28 - 7.19 (m, 2H), 7.10 - 7.00 (m, 4H), 2.65 (t, *J* = 7.0 Hz, 4H), 1.99 - 1.91 (m, 2H).

<sup>13</sup>C NMR (101 MHz, CHLOROFORM-D) δ 163.0 (d, *J* = 250.3 Hz, 2×C), 133.7(2×CH), 129.4 (d, *J* = 7.8 Hz, 2×CH), 123.9 (d, *J* = 3.6 Hz, 2×CH), 115.5 (d, *J* = 21.1 Hz, 2×CH), 112.4 (d, *J* = 16.0 Hz, 2×C), 94.7 (d, *J* = 3.0 Hz, 2×C≡C), 74.8(2×C≡C), 27.8, 19.0(2×CH<sub>2</sub>).

ESI-HRMS: *m/z* calcd for C<sub>19</sub>H<sub>14</sub>F<sub>2</sub> [M+H]<sup>+</sup>: 281.1136; found: 281.1134.

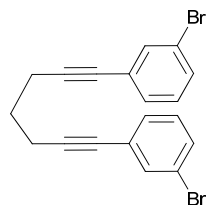

**1,7-bis(3-bromophenyl)hepta-1,6-diyne 1k:** oil.

<sup>1</sup>H NMR (400 MHz, CHLOROFORM-D) δ 7.55 (t, *J* = 1.7 Hz, 2H), 7.43 - 7.37 (m, 2H), 7.34 - 7.29 (m, 2H), 7.13 (t, *J* = 7.8 Hz, 2H), 2.58 (t, *J* = 7.0 Hz, 4H), 1.93 - 1.84 (m, 2H).

$^{13}\text{C}$  NMR (101 MHz, CHLOROFORM-D)  $\delta$  134.5(2 $\times$ CH), 131.0(2 $\times$ CH), 130.3(2 $\times$ CH), 129.8(2 $\times$ CH), 125.9(2 $\times$ C), 122.2(2 $\times$ C), 90.7(2 $\times$ C $\equiv$ C), 80.1(2 $\times$ C $\equiv$ C), 27.8, 18.8(2 $\times$ CH<sub>2</sub>).

ESI-HRMS:  $m/z$  calcd for C<sub>19</sub>H<sub>14</sub>Br<sub>2</sub> [M+H]<sup>+</sup>: 402.9515; found: 402.9515.

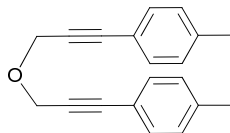

**4,4'-(oxybis(prop-1-yn-3,1-diyl))bis(methylbenzene) 1l:** oil.

$^1\text{H}$  NMR (301 MHz, CHLOROFORM-D)  $\delta$  7.34 (d,  $J$  = 8.0 Hz, 4H), 7.10 (d,  $J$  = 8.0 Hz, 4H), 4.52 (s, 4H), 2.32 (s, 6H).

$^{13}\text{C}$  NMR (76 MHz, CHLOROFORM-D)  $\delta$  138.7(2 $\times$ C), 131.8(4 $\times$ CH), 129.1(4 $\times$ CH), 119.5(2 $\times$ C), 87.0(2 $\times$ C $\equiv$ C), 83.8(2 $\times$ C $\equiv$ C), 57.5(2 $\times$ CH<sub>2</sub>), 21.5(2 $\times$ CH<sub>3</sub>).

ESI-HRMS:  $m/z$  calcd for C<sub>20</sub>H<sub>18</sub>O [M+H]<sup>+</sup>: 275.1430; found: 275.1431.

GC-MS  $m/z$ : 274

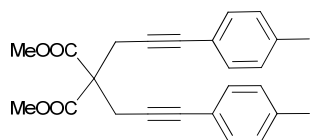

**dimethyl 2,2-bis(3-(p-tolyl)prop-2-yn-1-yl)malonate 1m:** <sup>1b</sup>

$^1\text{H}$  NMR (400 MHz, CHLOROFORM-D)  $\delta$  7.26 (d,  $J$  = 8.0 Hz, 4H), 7.08 (d,  $J$  = 8.0 Hz, 4H), 3.79 (s, 6H), 3.25 (s, 4H), 2.32 (s, 6H).

$^{13}\text{C}$  NMR (101 MHz, CHLOROFORM-D)  $\delta$  169.6(2 $\times$ C=O), 138.2(2 $\times$ C), 131.7(4 $\times$ CH), 129.1(4 $\times$ CH), 120.1(2 $\times$ C), 84.0(2 $\times$ C $\equiv$ C), 83.3(2 $\times$ C $\equiv$ C), 57.5, 53.2(2 $\times$ CH<sub>3</sub>), 24.0(2 $\times$ CH<sub>2</sub>), 21.6(2 $\times$ CH<sub>3</sub>).

ESI-HRMS:  $m/z$  calcd for C<sub>25</sub>H<sub>24</sub>O<sub>4</sub> [M+H]<sup>+</sup>: 389.1747; found: 389.1746.

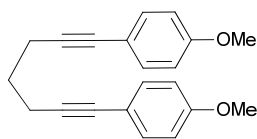

**1,7-bis(4-methoxyphenyl)hepta-1,6-diyne 1i:** white solid, melting point: 49 °C.

$^1\text{H}$  NMR (400 MHz, CHLOROFORM-D)  $\delta$  7.36 - 7.30 (m, 4H), 6.87 - 6.76 (m, 4H), 3.79 (s, 6H), 2.56 (t,  $J$  = 7.0 Hz, 4H), 1.94 - 1.83 (m, 2H).

$^{13}\text{C}$  NMR (101 MHz, CHLOROFORM-D)  $\delta$  159.2(2 $\times$ C), 133.0(4 $\times$ CH), 116.1(2 $\times$ C), 114.0(4 $\times$ CH), 87.8(2 $\times$ C $\equiv$ C), 81.0(2 $\times$ C $\equiv$ C), 55.4(2 $\times$ OCH<sub>3</sub>), 28.3, 18.8(2 $\times$ CH<sub>2</sub>).

ESI-HRMS:  $m/z$  calcd for C<sub>21</sub>H<sub>20</sub>O<sub>2</sub> [M+H]<sup>+</sup>: 305.1536; found: 305.1539.

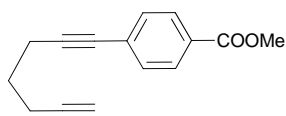

**methyl 4-(hepta-1,6-diyne-1-yl)benzoate 1p:** oil.

$^1\text{H}$  NMR (400 MHz, CHLOROFORM-D)  $\delta$  7.95 (d,  $J = 8.3$  Hz, 2H), 7.44 (d,  $J = 8.3$  Hz, 2H), 3.90 (s, 3H), 2.57 (t,  $J = 7.0$  Hz, 2H), 2.38 (td,  $J = 7.0, 2.6$  Hz, 2H), 2.00 (t,  $J = 2.6$  Hz, 1H), 1.88 - 1.80(m, 2H).

$^{13}\text{C}$  NMR (101 MHz, CHLOROFORM-D)  $\delta$  166.7, 131.6(2 $\times$ CH), 129.5(2 $\times$ CH), 129.1, 128.7, 92.5, 83.5, 80.9, 69.2, 52.3, 27.6, 18.7, 17.8.

ESI-HRMS:  $m/z$  calcd for  $\text{C}_{15}\text{H}_{14}\text{O}_2$   $[\text{M}+\text{H}]^+$ : 227.1067; found: 227.1067.

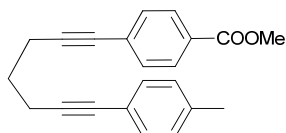

**methyl 4-(7-(p-tolyl)hepta-1,6-diyn-1-yl)benzoate 1o**: white solid, melting point: 119 °C.

$^1\text{H}$  NMR (301 MHz, CHLOROFORM-D)  $\delta$  7.95 (d,  $J = 8.3$  Hz, 2H), 7.45 (d,  $J = 8.3$  Hz, 2H), 7.29 (d,  $J = 8.1$  Hz, 2H), 7.09 (d,  $J = 8.1$  Hz, 2H), 3.91 (s, 3H), 2.66 - 2.55 (m, 4H), 2.33 (s, 3H), 1.98 - 1.85 (m, 2H).

$^{13}\text{C}$  NMR (76 MHz, CHLOROFORM-D)  $\delta$  166.8, 137.8, 131.7(2 $\times$ CH), 131.6(2 $\times$ CH), 129.6(2 $\times$ CH), 129.1(2 $\times$ CH, C), 128.8, 120.8, 92.9, 88.3, 81.5, 80.8, 52.3, 28.0, 21.6, 18.9.

ESI-HRMS:  $m/z$  calcd for  $\text{C}_{22}\text{H}_{20}\text{O}_2$   $[\text{M}+\text{H}]^+$ : 317.1536; found: 317.1534.



## 4. NMR spectra of starting materials **1**

**1a**

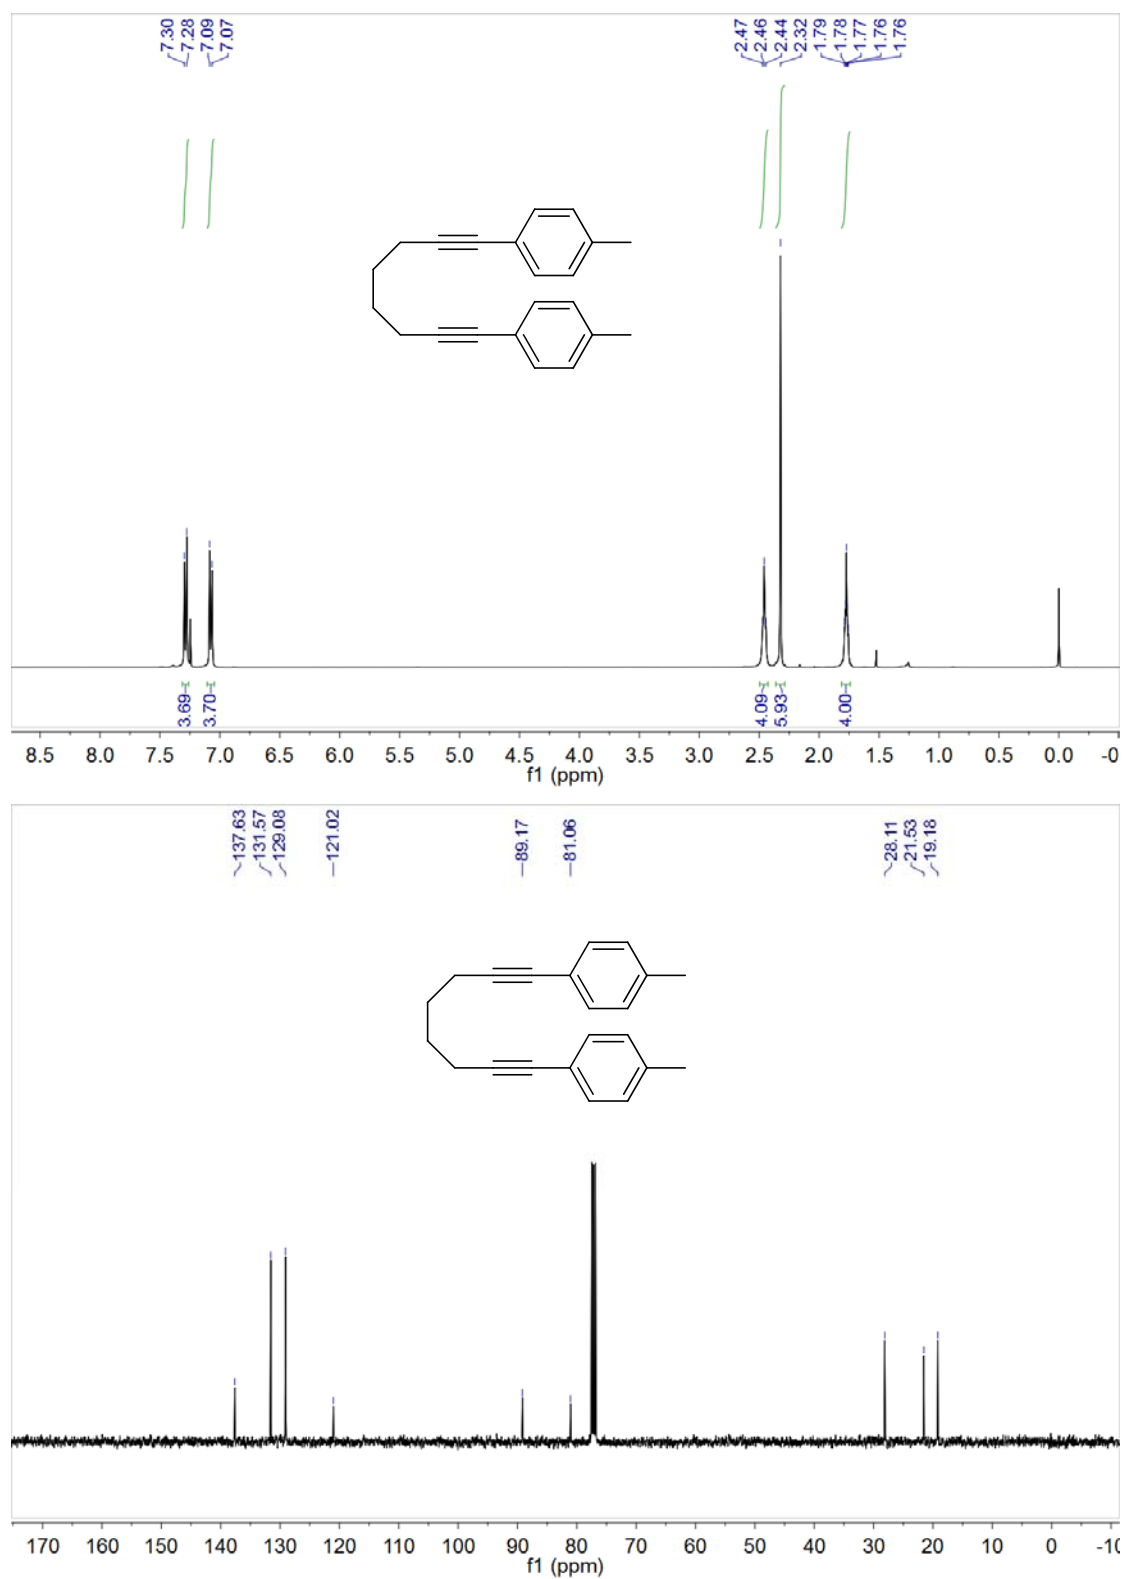

$^1\text{H}$  NMR (400 MHz,  $\text{CDCl}_3$ ) (up) and  $^{13}\text{C}$  NMR (101 MHz,  $\text{CDCl}_3$ ) (down)

1b

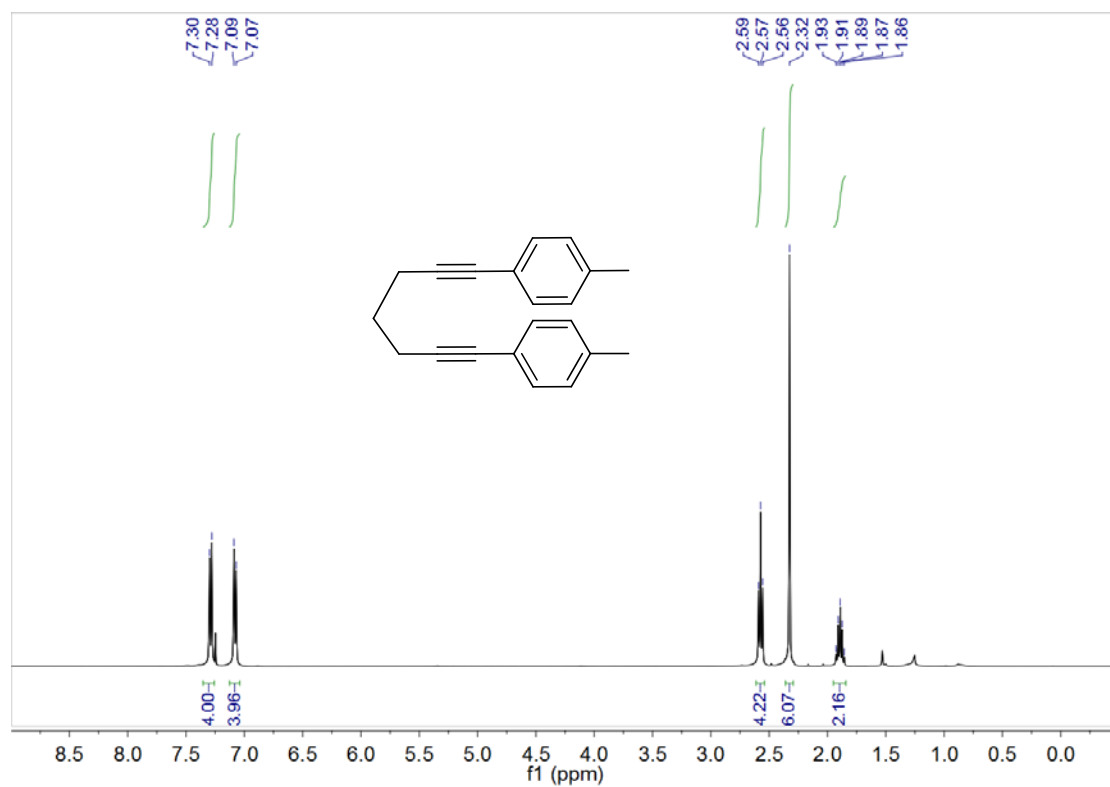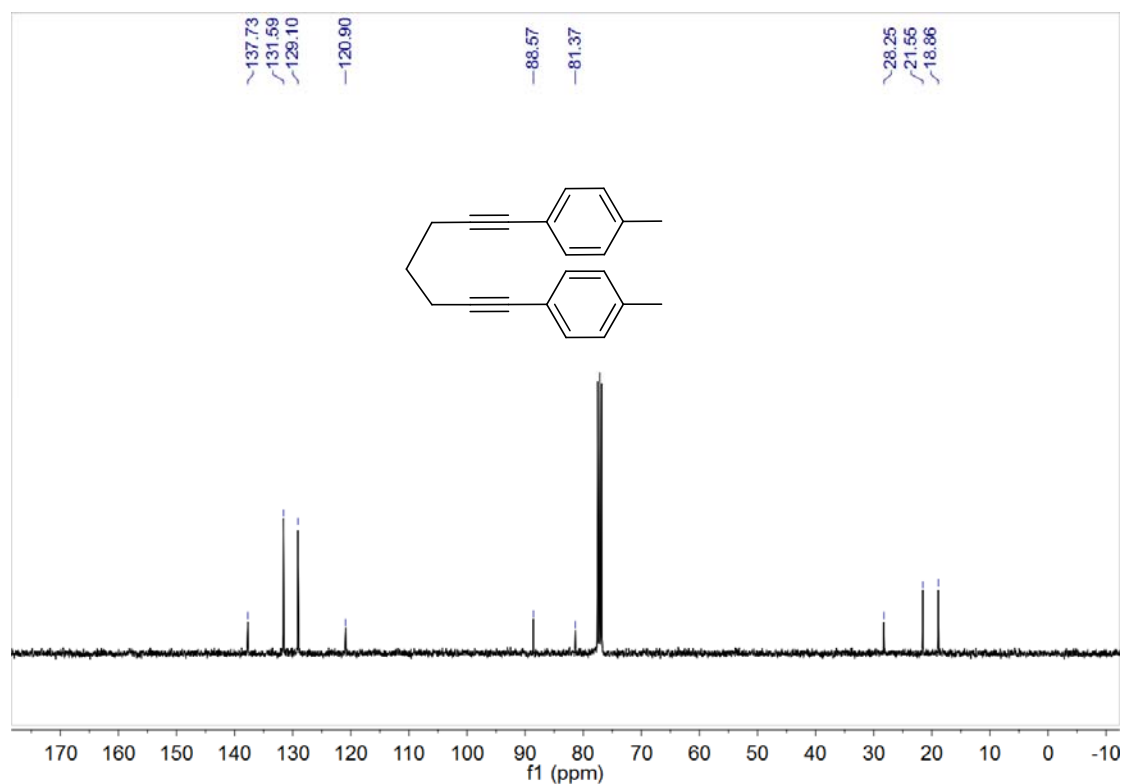

<sup>1</sup>H NMR (400 MHz, CDCl<sub>3</sub>) (up) and <sup>13</sup>C NMR (101 MHz, CDCl<sub>3</sub>) (down)

1c

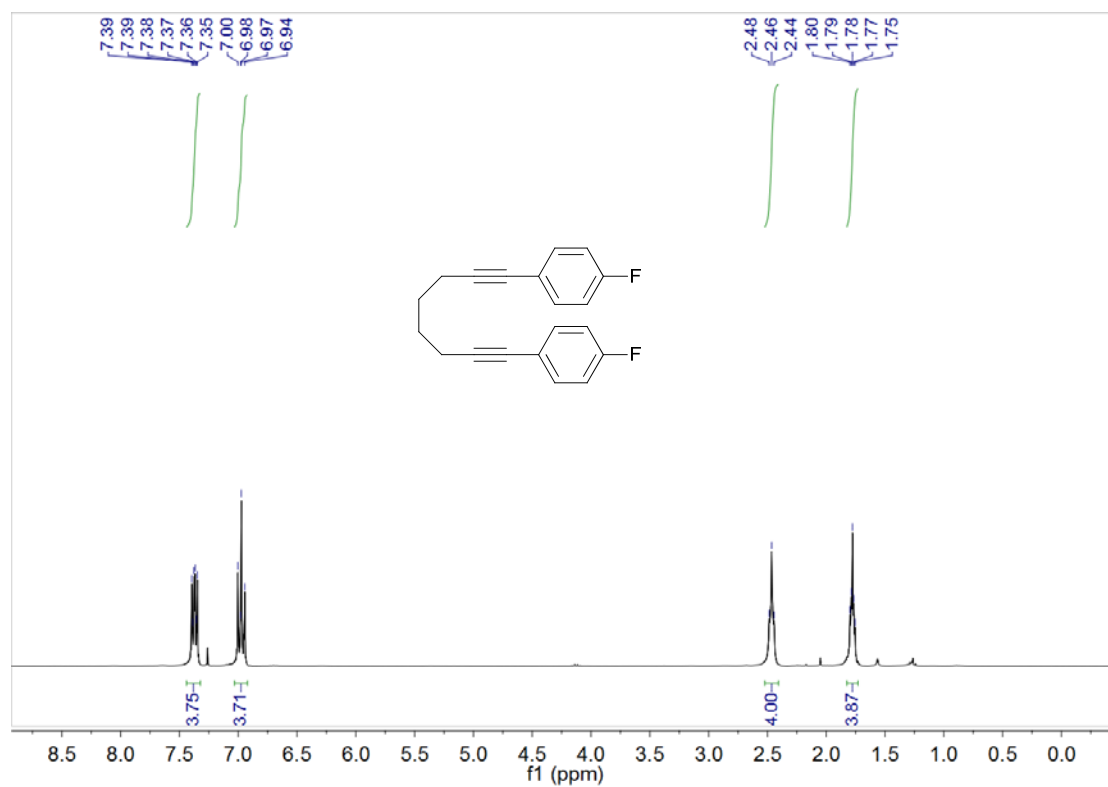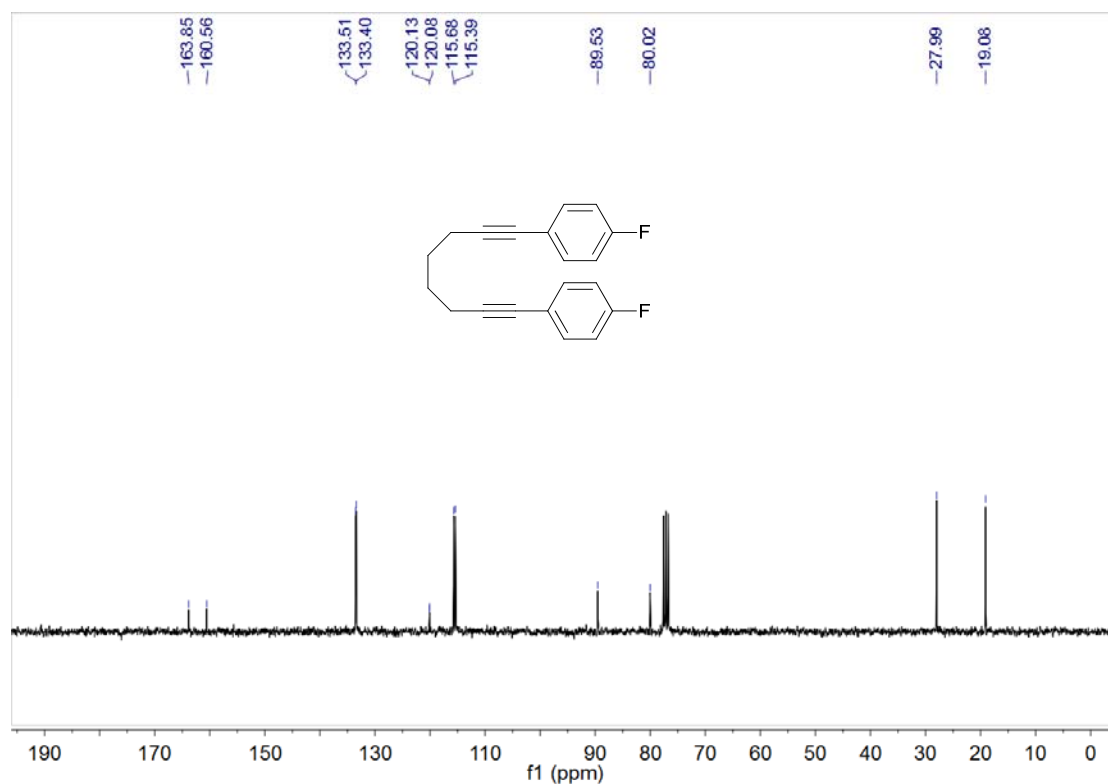

<sup>1</sup>H NMR (300 MHz, CDCl<sub>3</sub>) (up) and <sup>13</sup>C NMR (76 MHz, CDCl<sub>3</sub>) (down)

1d

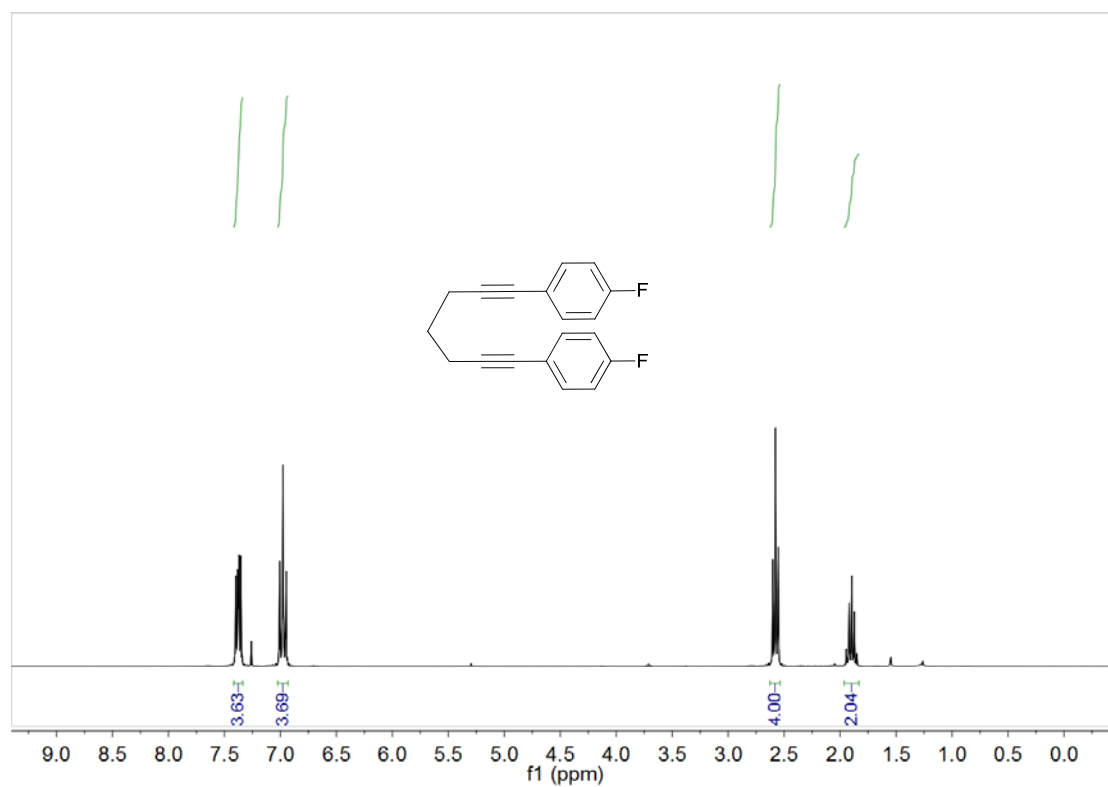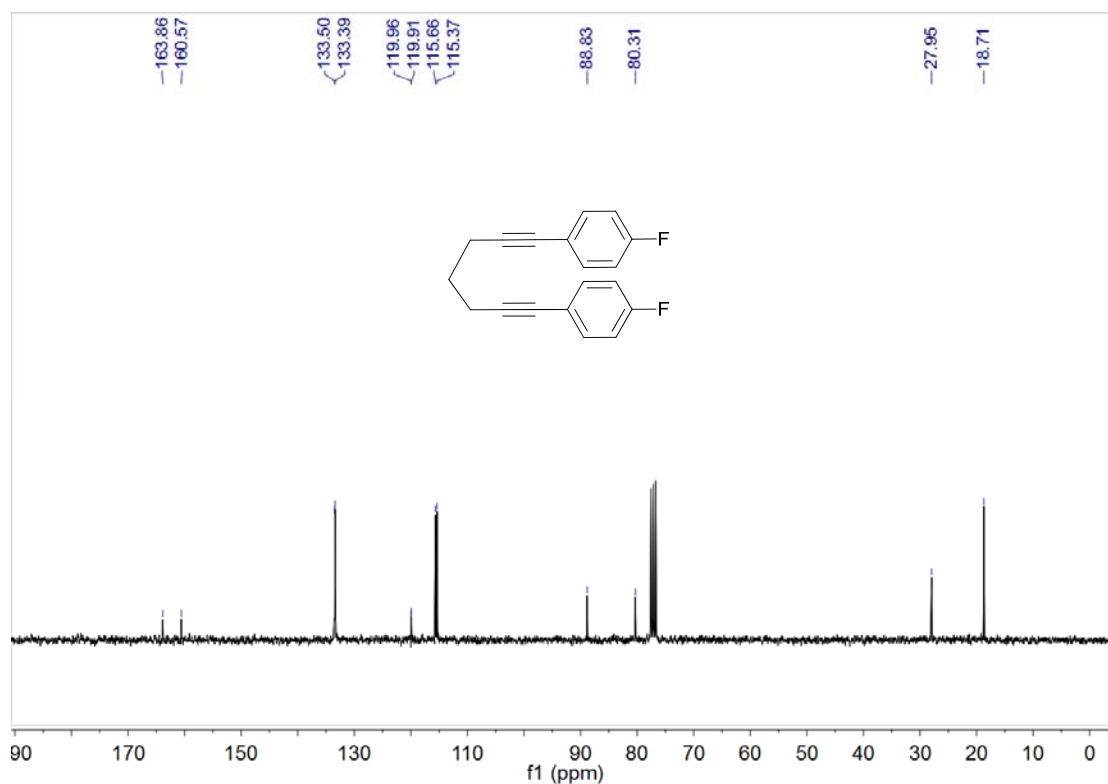

<sup>1</sup>H NMR (300 MHz, CDCl<sub>3</sub>) (up) and <sup>13</sup>C NMR (76 MHz, CDCl<sub>3</sub>) (down)

1e

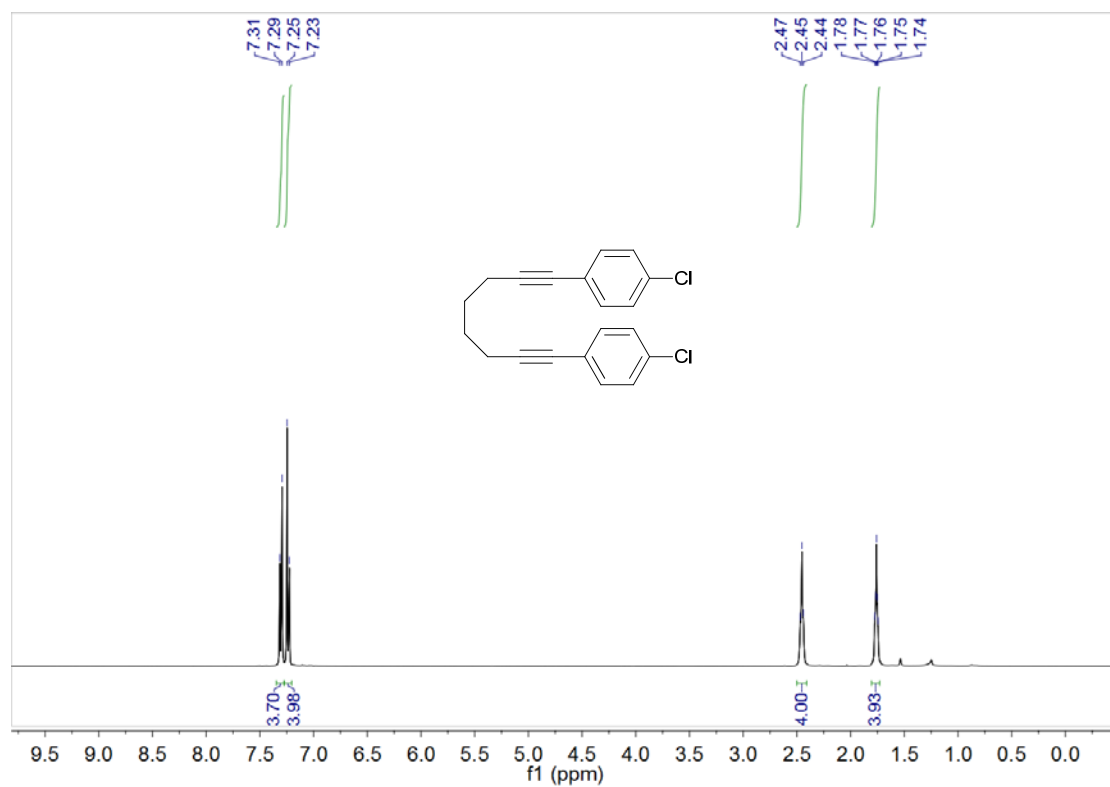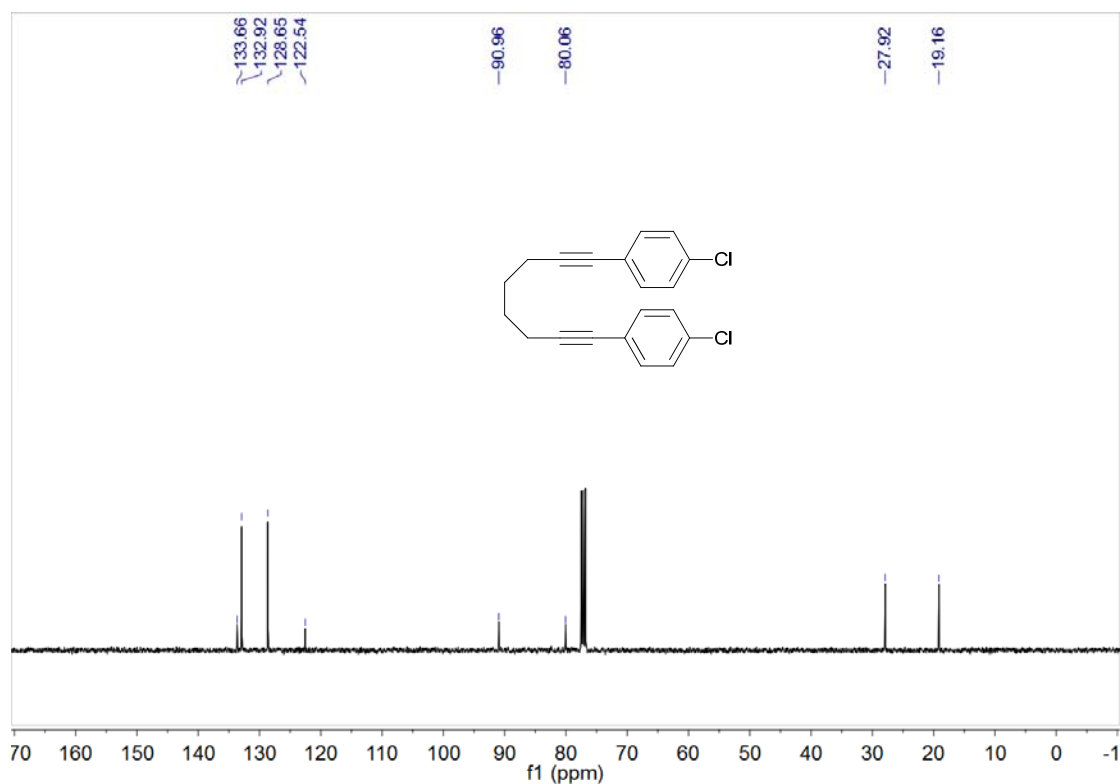

<sup>1</sup>H NMR (400 MHz, CDCl<sub>3</sub>) (up) and <sup>13</sup>C NMR (101 MHz, CDCl<sub>3</sub>) (down)

1f

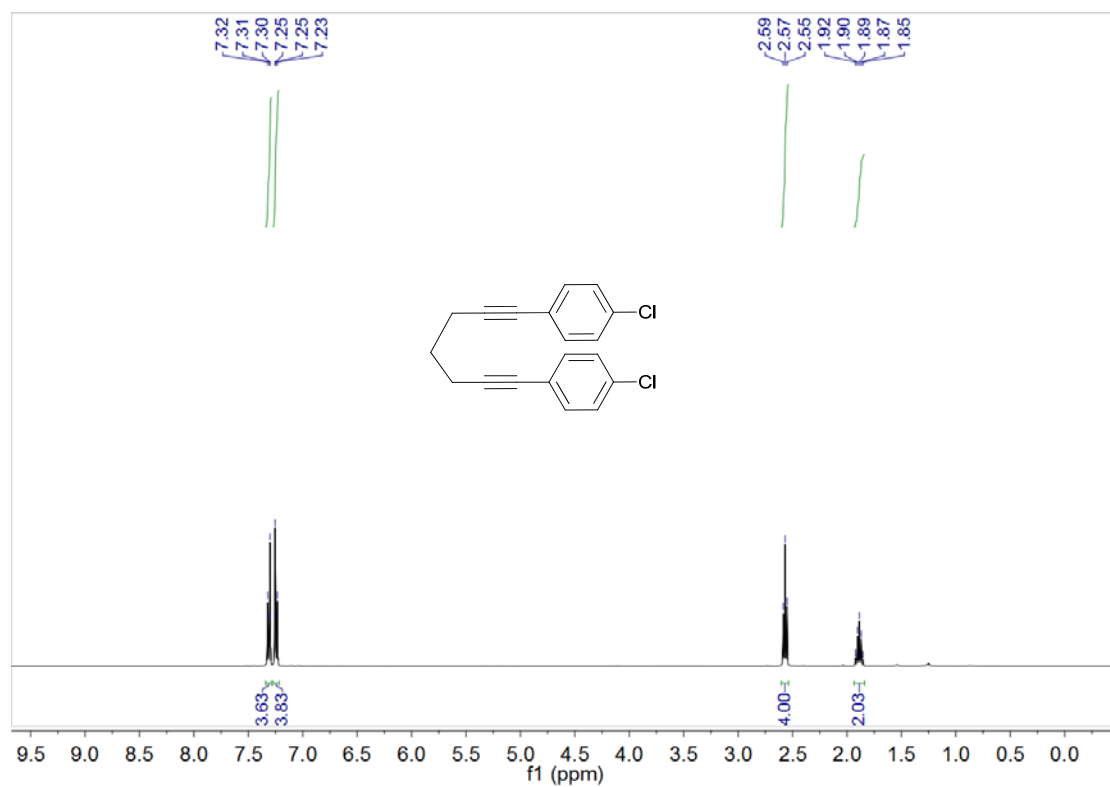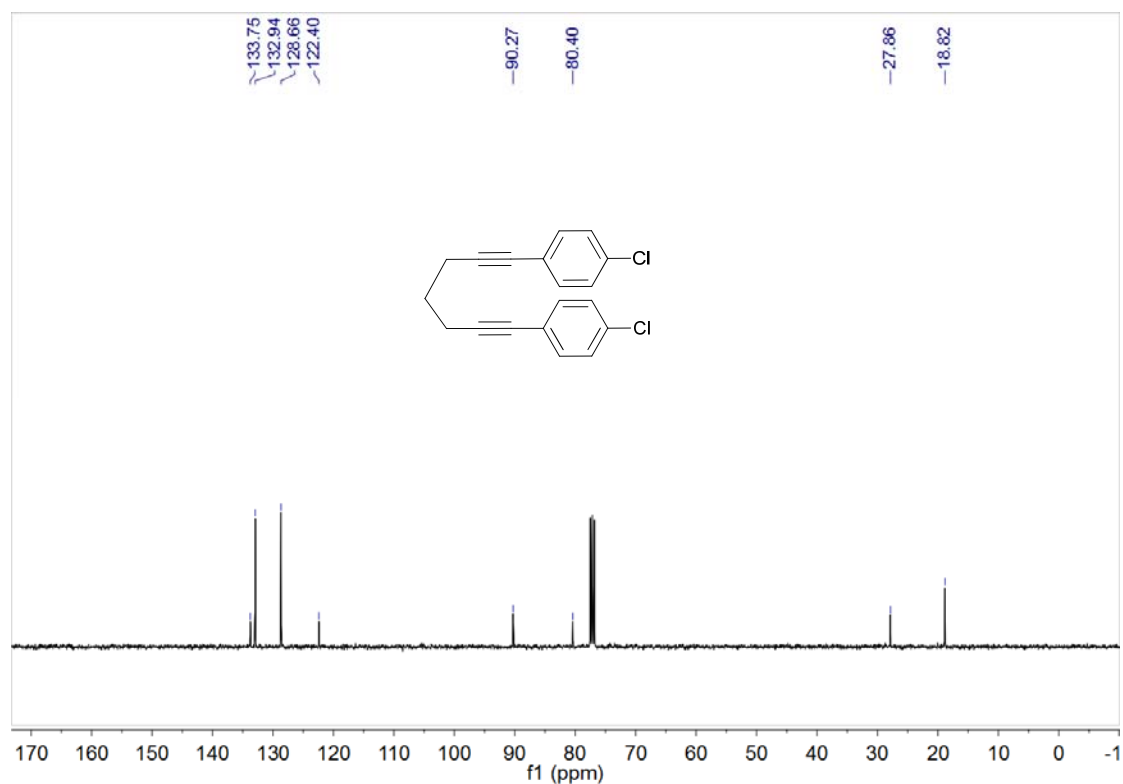

<sup>1</sup>H NMR (400 MHz, CDCl<sub>3</sub>) (up) and <sup>13</sup>C NMR (101 MHz, CDCl<sub>3</sub>) (down)

1g

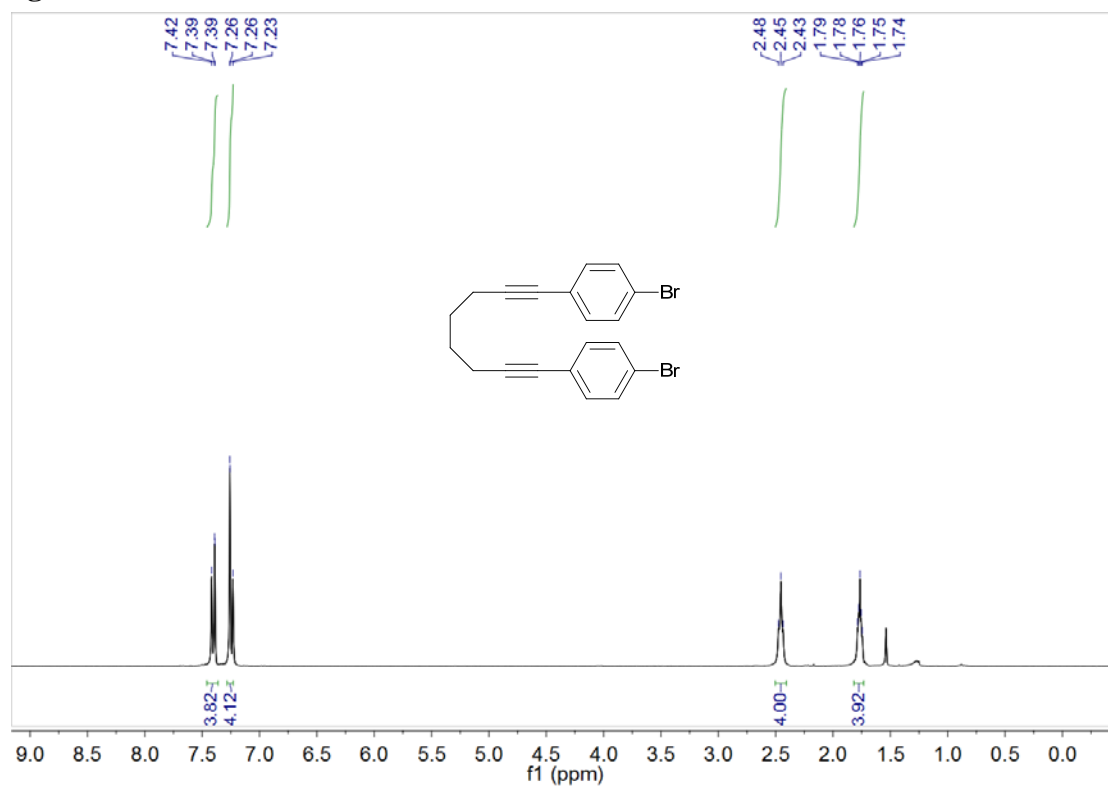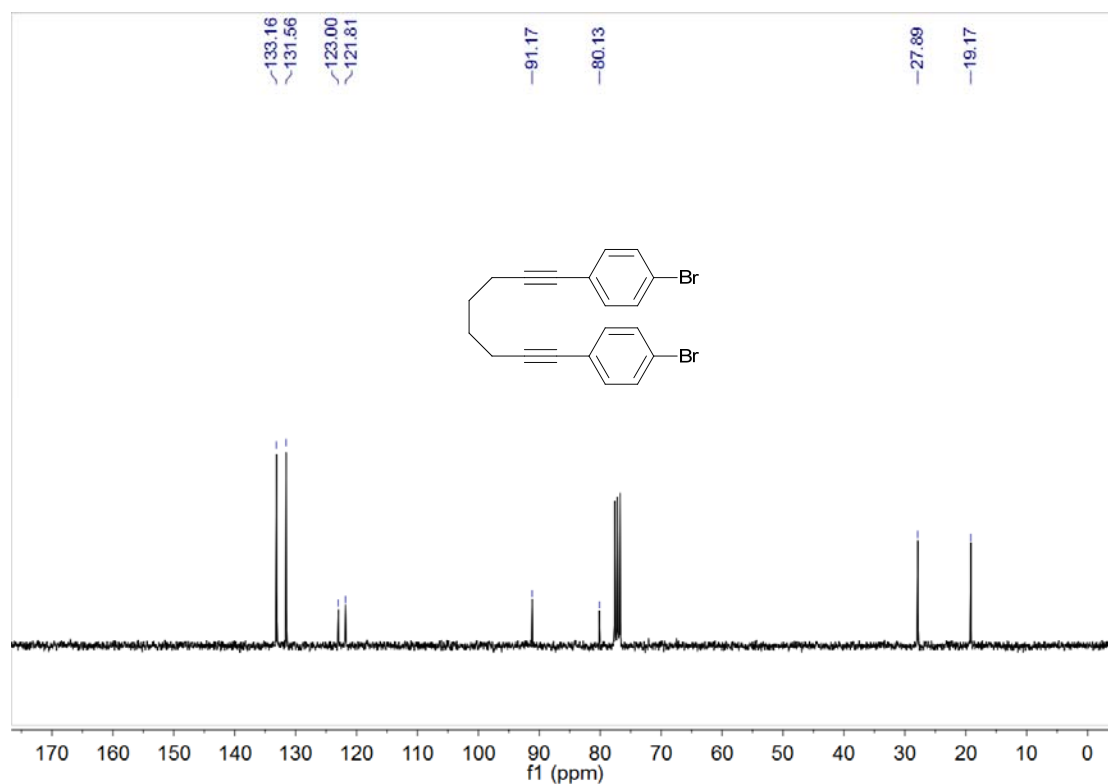

<sup>1</sup>H NMR (300 MHz, CDCl<sub>3</sub>) (up) and <sup>13</sup>C NMR (76 MHz, CDCl<sub>3</sub>) (down)

1h

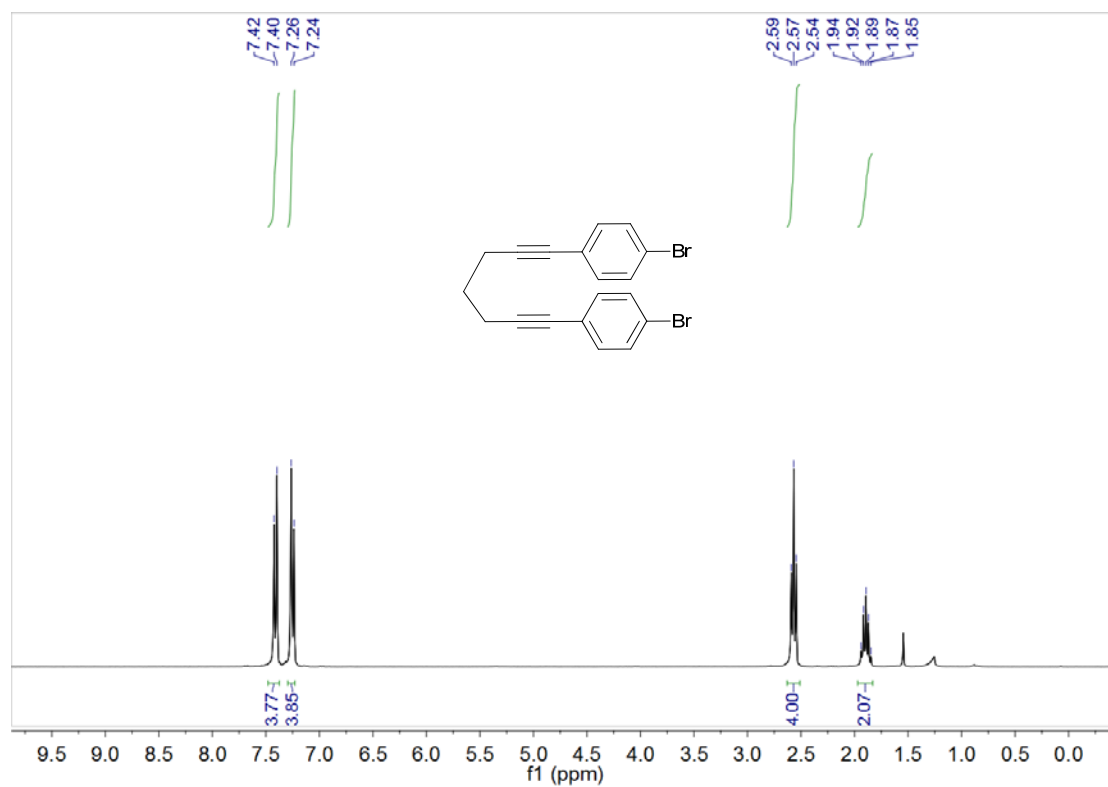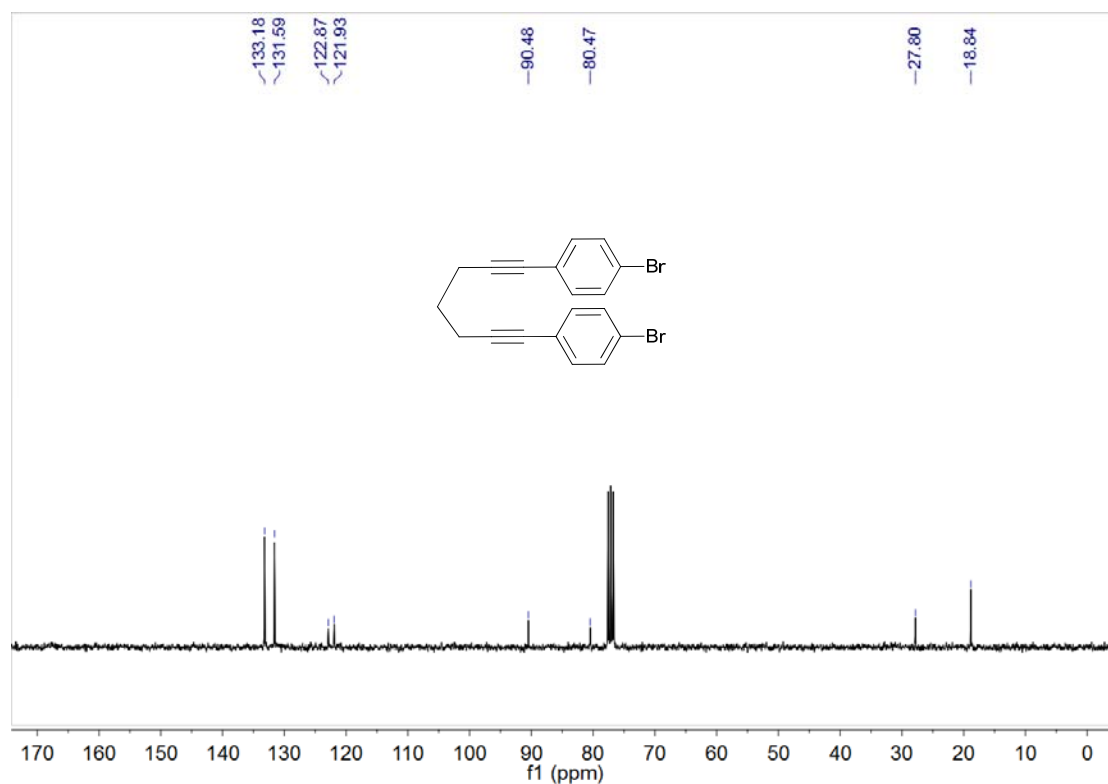

<sup>1</sup>H NMR (300 MHz, CDCl<sub>3</sub>) (up) and <sup>13</sup>C NMR (76 MHz, CDCl<sub>3</sub>) (down)



1i

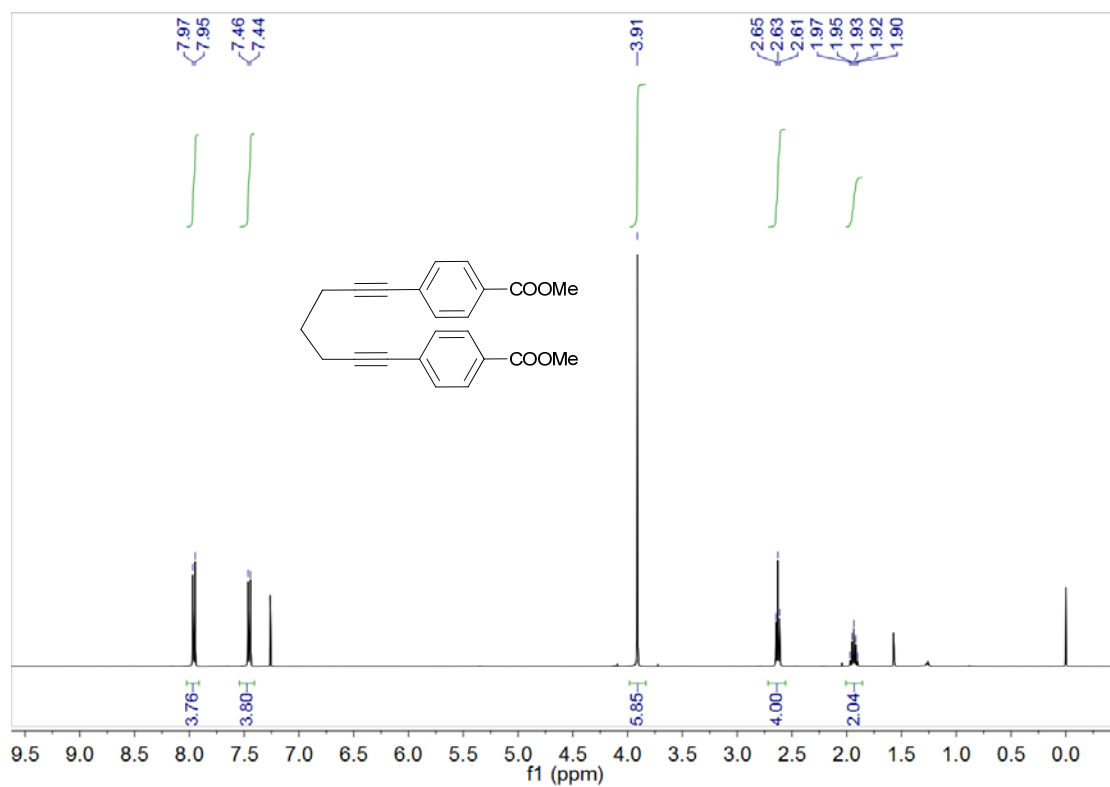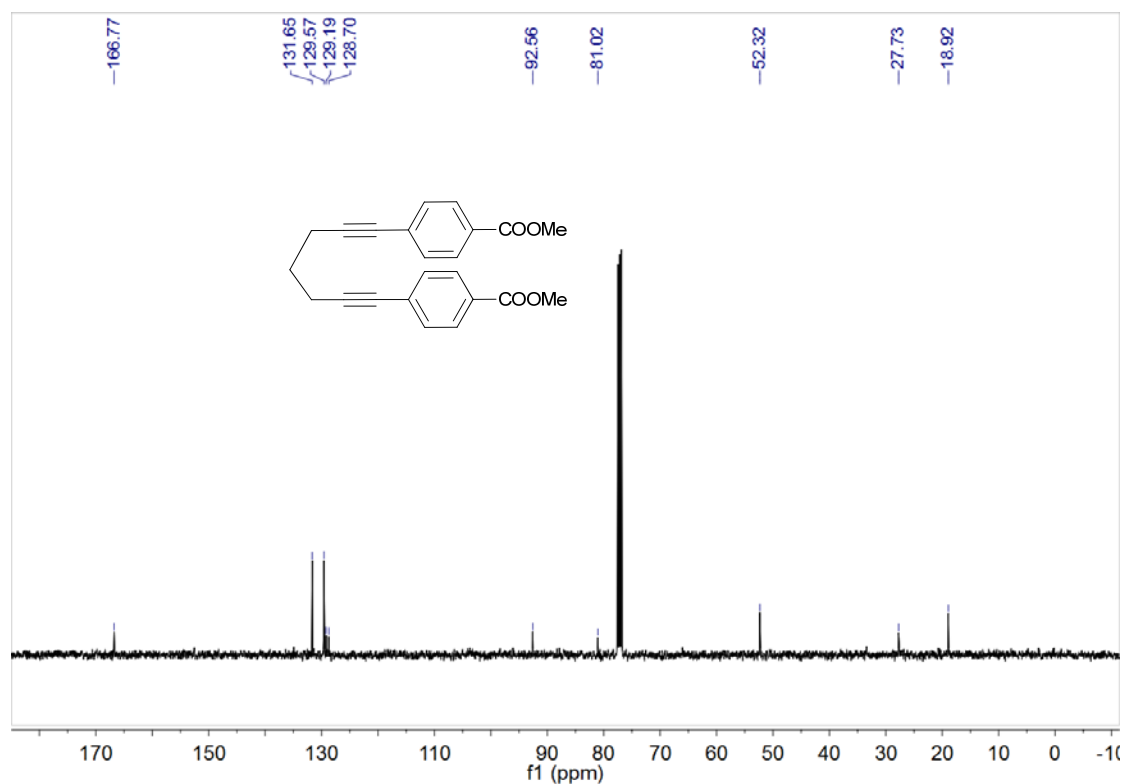

<sup>1</sup>H NMR (400 MHz, CDCl<sub>3</sub>) (up) and <sup>13</sup>C NMR (101 MHz, CDCl<sub>3</sub>) (down)

1j

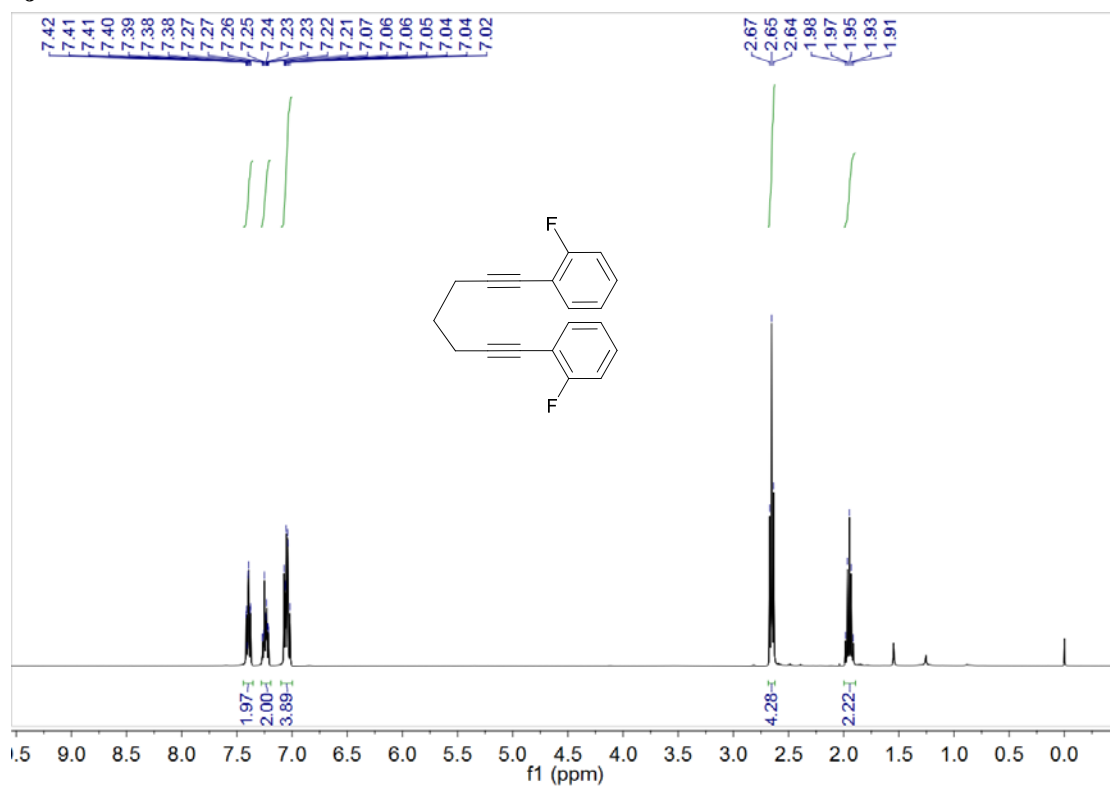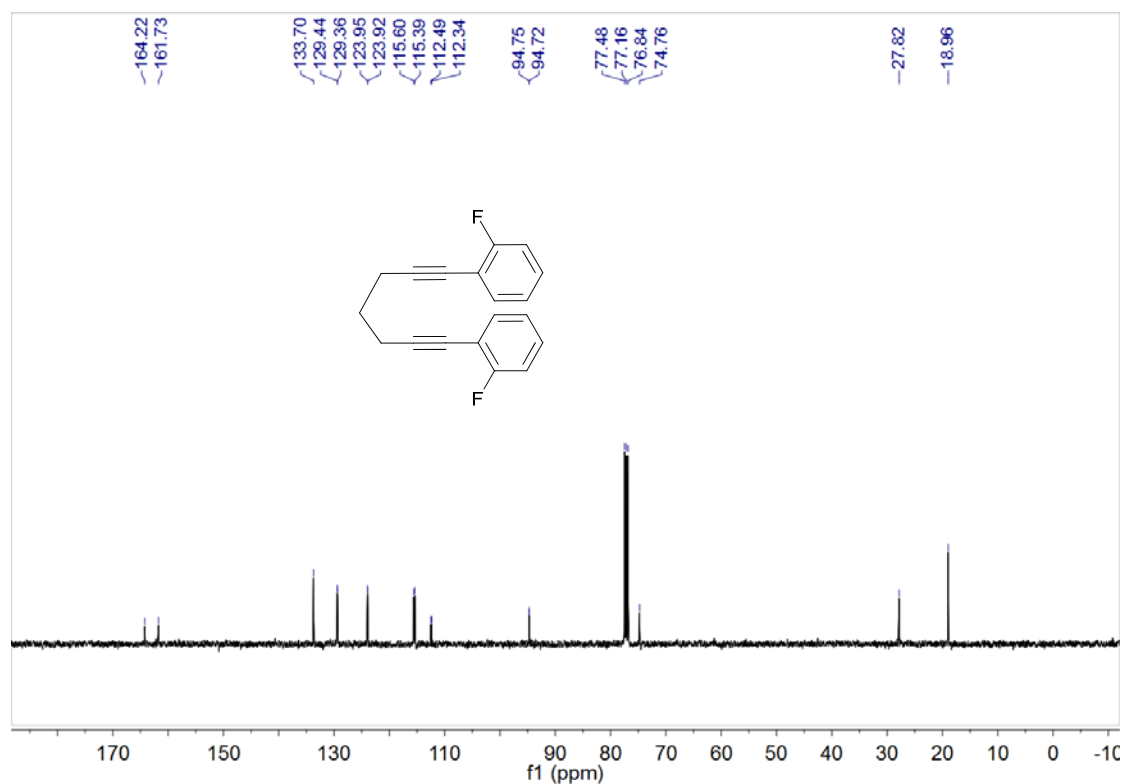

$^1\text{H}$  NMR (400 MHz,  $\text{CDCl}_3$ ) (up) and  $^{13}\text{C}$  NMR (101 MHz,  $\text{CDCl}_3$ ) (down)



11

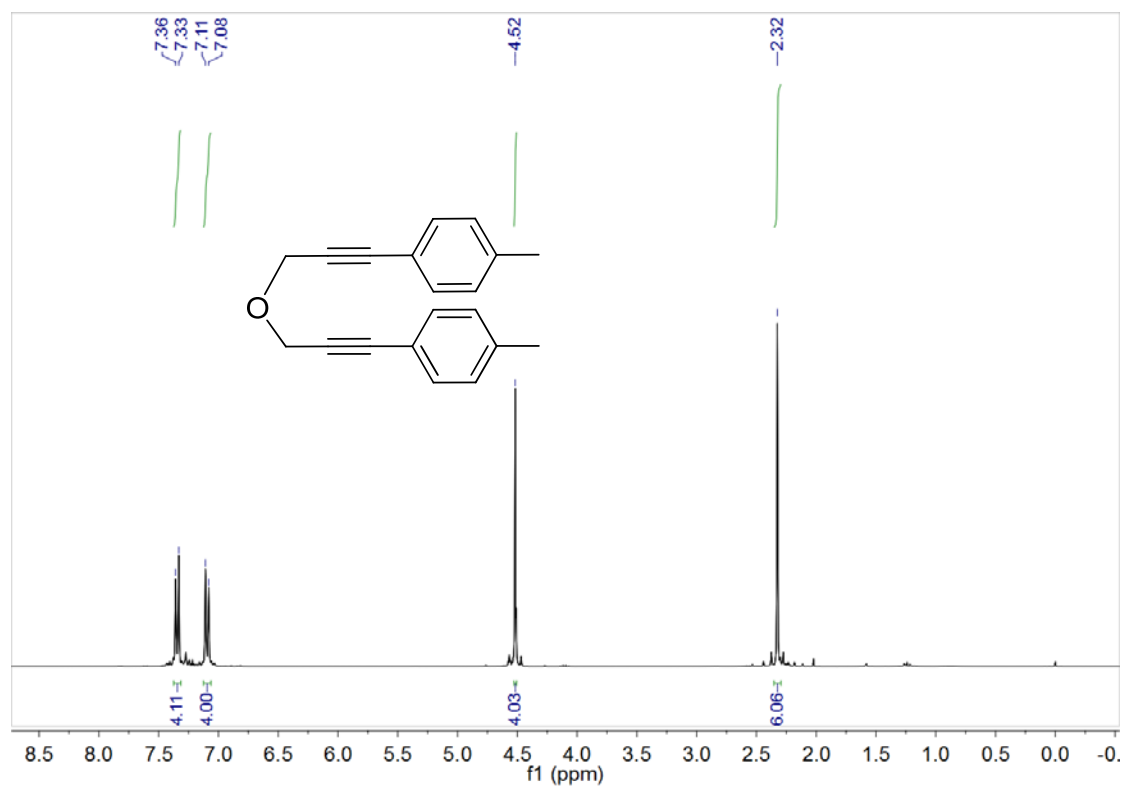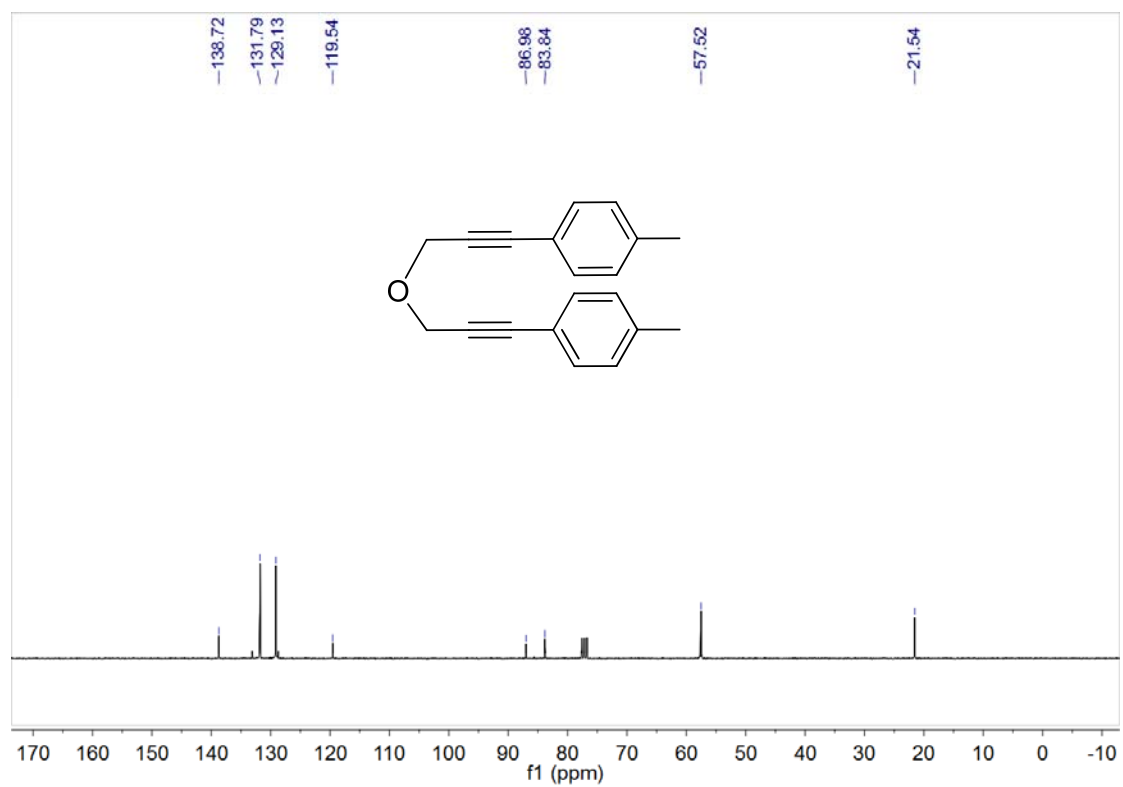

<sup>1</sup>H NMR (300 MHz, CDCl<sub>3</sub>) (up) and <sup>13</sup>C NMR (76 MHz, CDCl<sub>3</sub>) (down)

1m

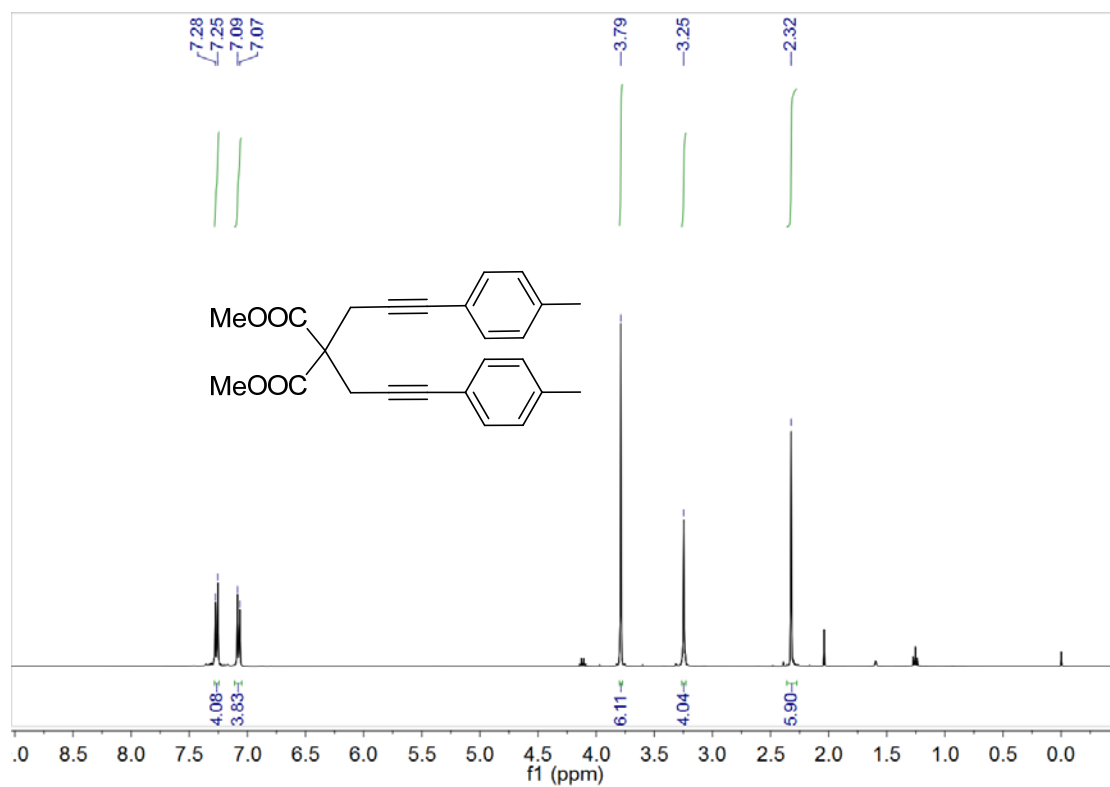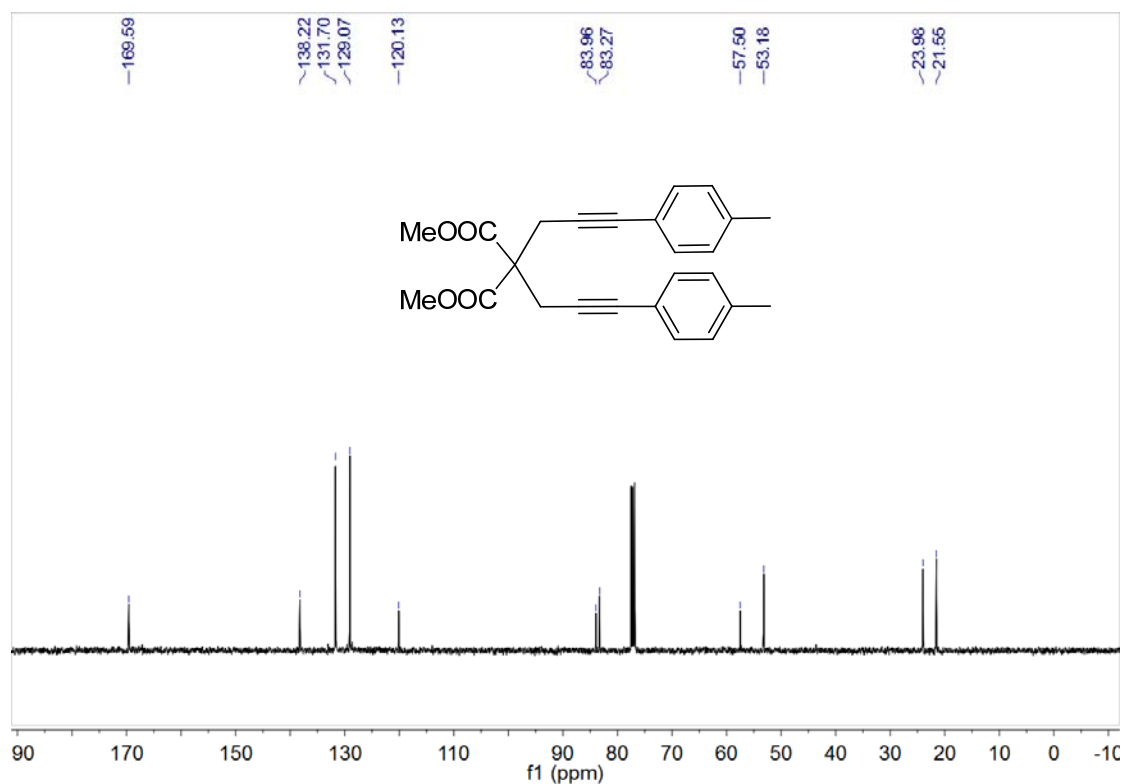

<sup>1</sup>H NMR (400 MHz, CDCl<sub>3</sub>) (up) and <sup>13</sup>C NMR (101 MHz, CDCl<sub>3</sub>) (down)

1n

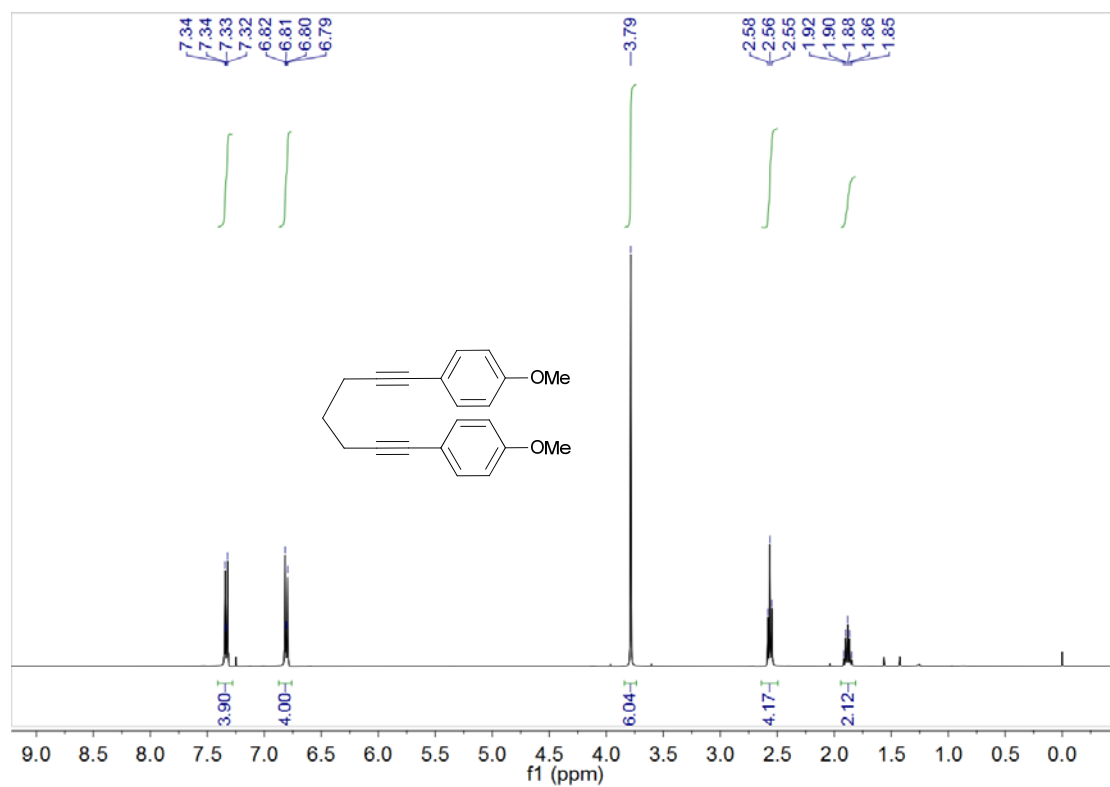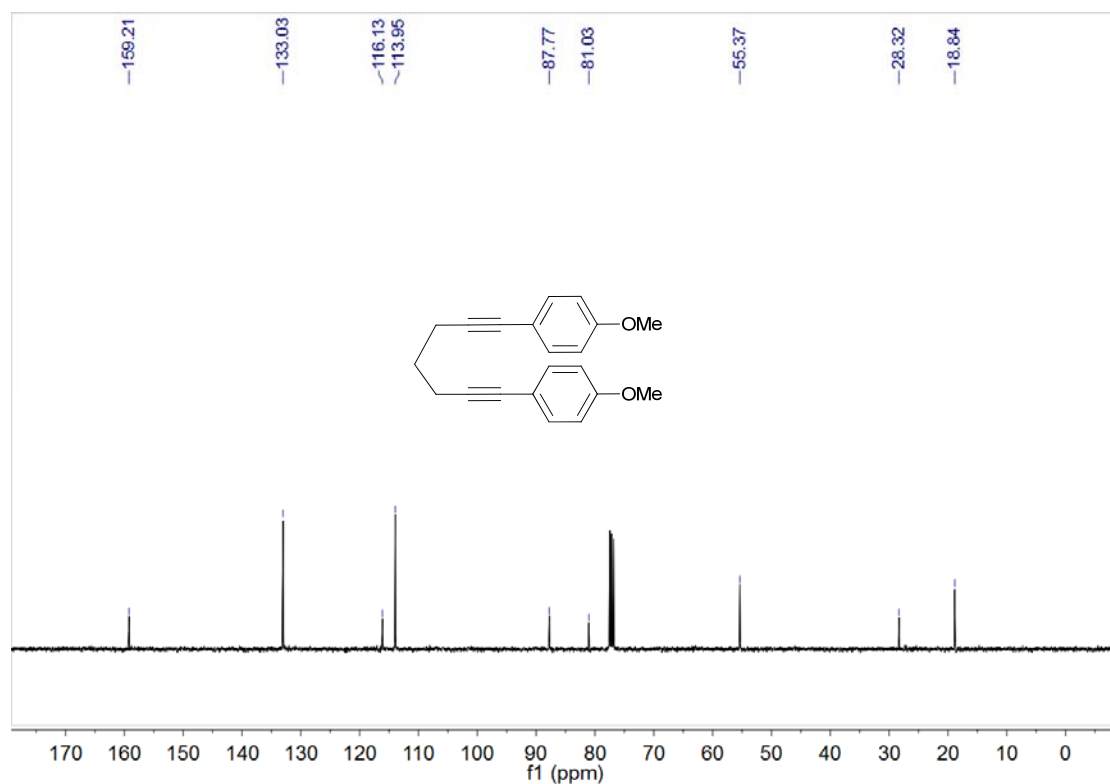

$^1\text{H}$  NMR (400 MHz,  $\text{CDCl}_3$ ) (up) and  $^{13}\text{C}$  NMR (101 MHz,  $\text{CDCl}_3$ ) (down)

1p

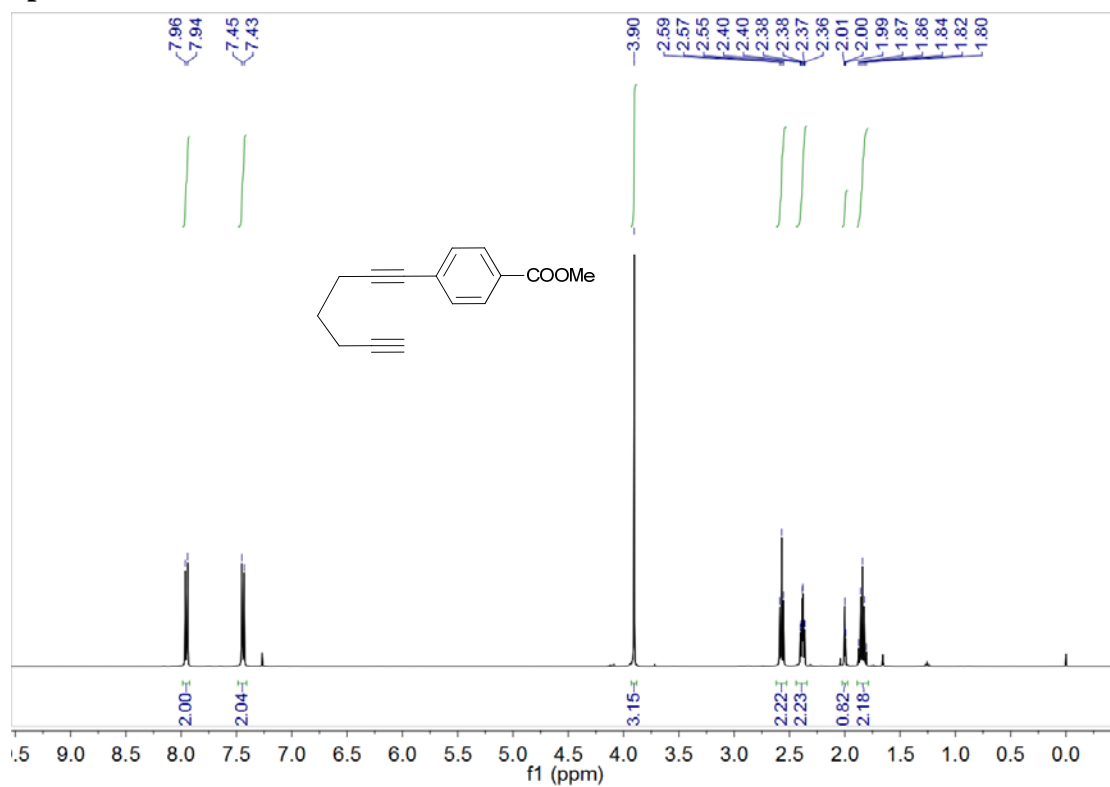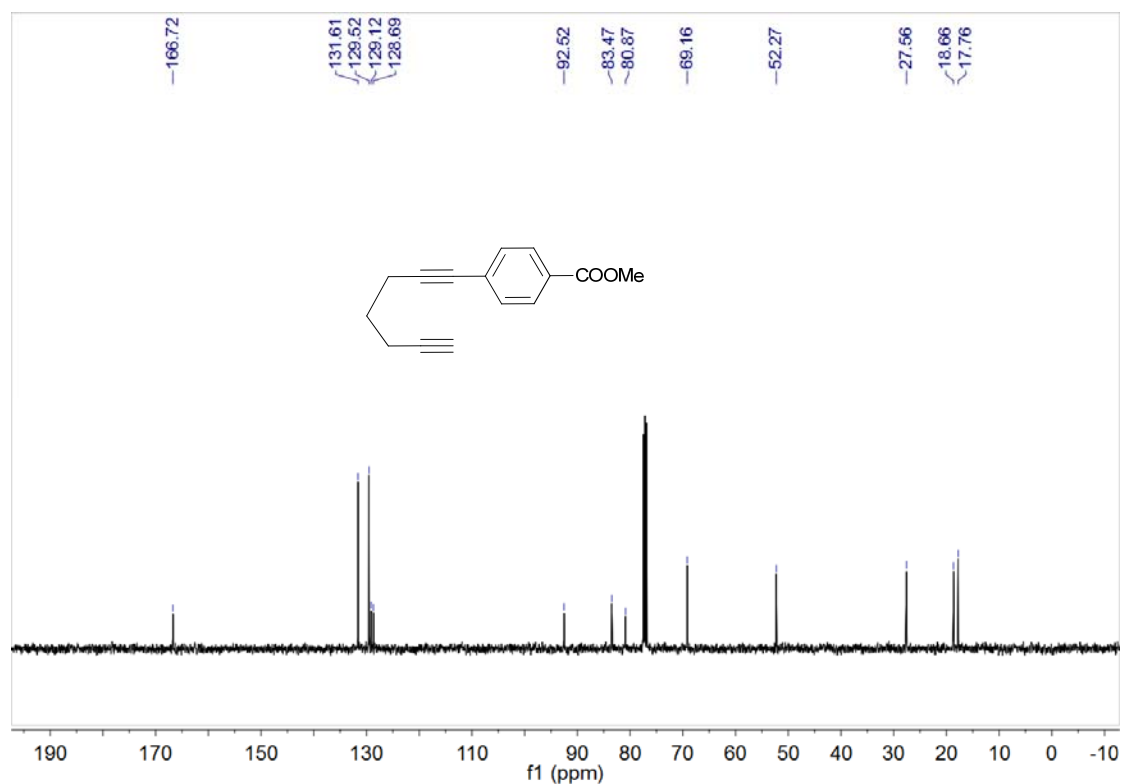

<sup>1</sup>H NMR (400 MHz, CDCl<sub>3</sub>) (up) and <sup>13</sup>C NMR (101 MHz, CDCl<sub>3</sub>) (down)

1o

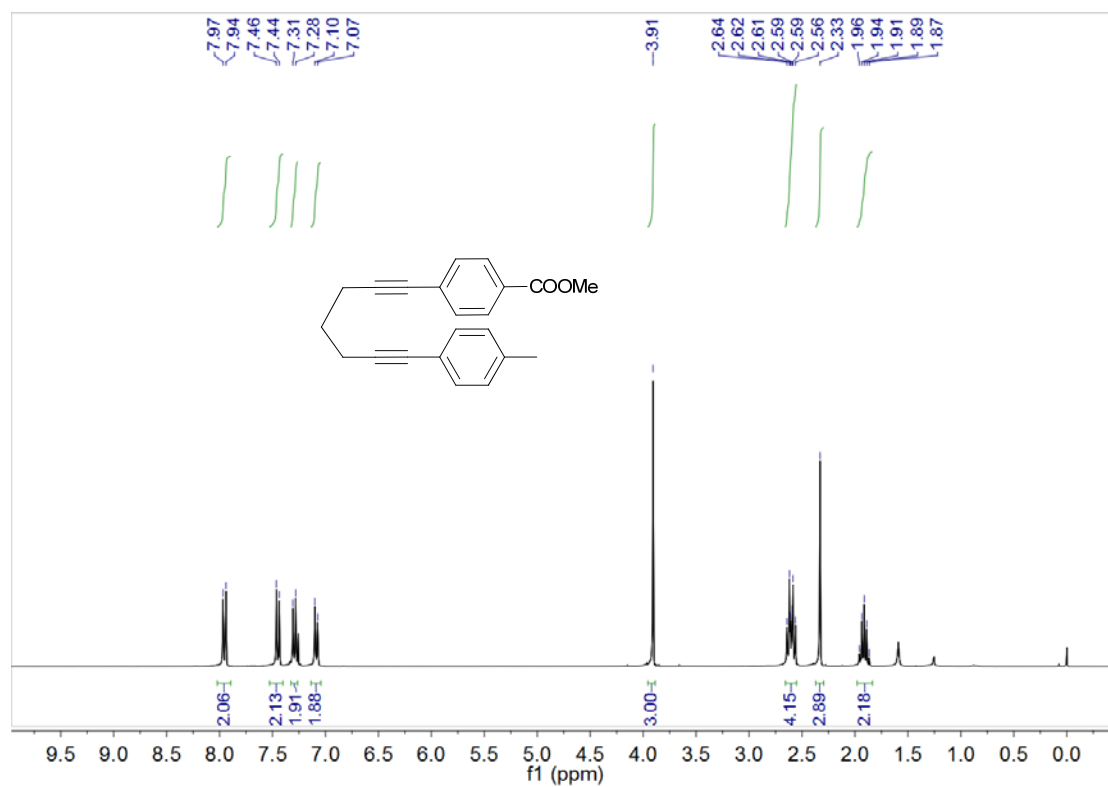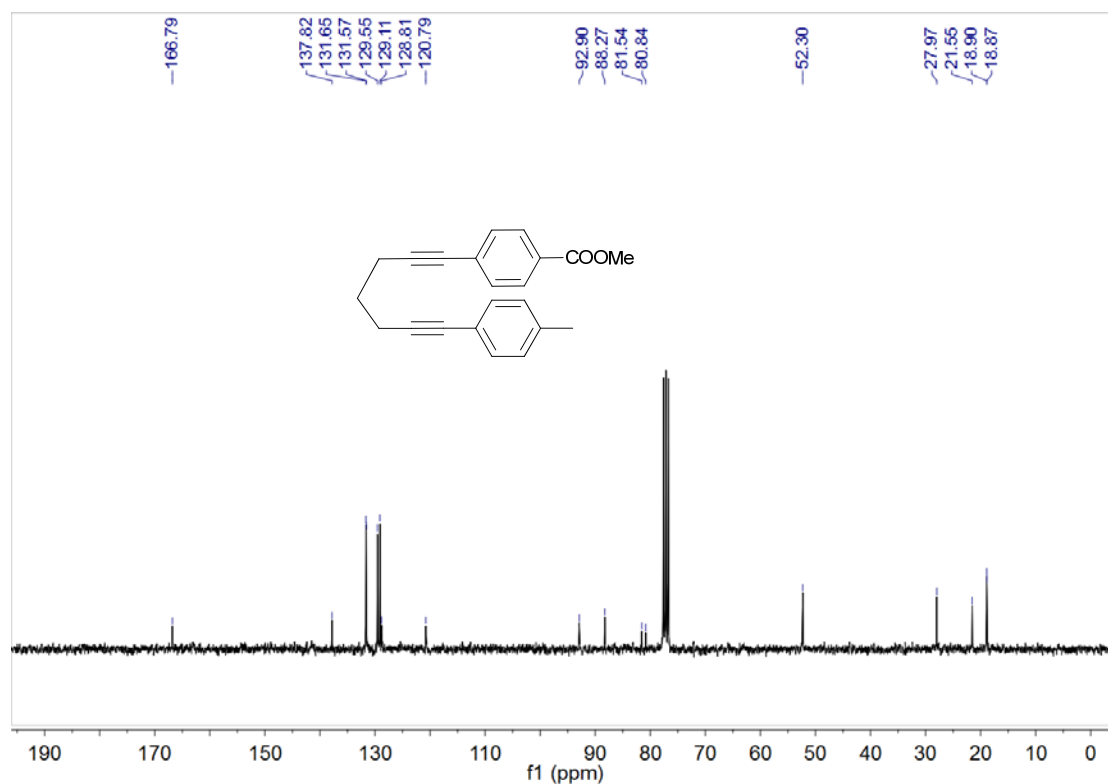

<sup>1</sup>H NMR (300 MHz, CDCl<sub>3</sub>) (up) and <sup>13</sup>C NMR (76 MHz, CDCl<sub>3</sub>) (down)



## 5. General procedure for the synthesis of products

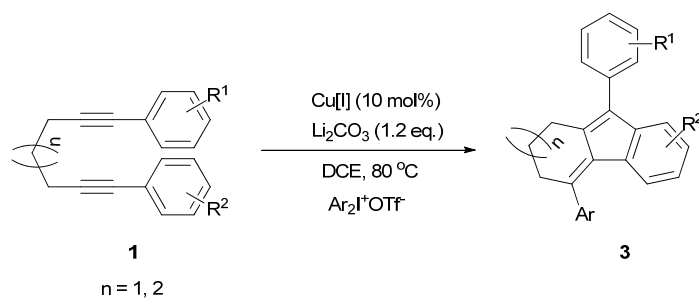

A sealed tube was charged with the mixture of prepared diyne **1** (0.2 mmol), diaryliodonium salt **2** (0.24 mmol),  $\text{Li}_2\text{CO}_3$  (0.24 mmol, 18 mg),  $\text{CuBr}$  ( $n=2$ , 0.02 mmol, 3 mg) or  $\text{CuCl}$  ( $n=1$ , 0.02 mmol, 2 mg). The tube was evacuated and recharged with  $\text{N}_2$  for 4 times. Then dichloroethane (2.0 mL) were added, the tube was sealed and the mixture was allowed to stir at  $80\text{ }^\circ\text{C}$  for 12 h. After completion, the mixture was cooled to room temperature, then water (4 mL) was added and the mixture was extracted with EA ( $4\text{ mL} \times 3$ ), dried by anhydrous  $\text{Na}_2\text{SO}_4$ . Evaporation of the solvent followed by purification on silica gel (PE or PE/EA) provided the corresponding product as a yellow solid. Or evaporation of the solvent and the yellow products were recrystallized from the dichloromethane or diethyl ether.

## 6. Characterization data of polycyclic products

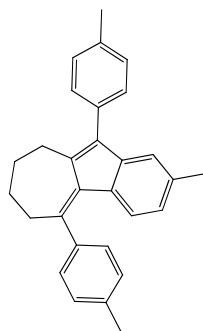

**2-methyl-5,10-di-*p*-tolyl-6,7,8,9-tetrahydrobenzo[*a*]azulene (3aa):** yellow solid, 50 mg, yield: 66%, melting point: 177 °C.

<sup>1</sup>H NMR (400 MHz, CHLOROFORM-*D*) δ 7.23 - 7.37 (m, 8H), 6.96 (s, 1H), 6.60 (d, *J* = 7.9 Hz, 1H), 6.25 (d, *J* = 7.9 Hz, 1H), 2.91 - 2.84 (m, 2H), 2.81 - 2.75 (m, 2H), 2.44 (s, 3H), 2.43 (s, 3H), 2.23 (s, 3H), 2.06 - 1.92 (m, 2H), 1.91 - 1.71 (m, 2H).

<sup>13</sup>C NMR (101 MHz, CHLOROFORM-*D*) δ 150.3, 143.8, 141.8, 139.9, 139.3, 139.1, 137.6, 136.9, 136.2, 133.4, 132.7, 129.5(2×CH), 129.5(2×CH), 129.2(2×CH), 128.3(2×CH), 124.8, 122.7, 119.9, 36.2, 26.9, 25.7, 25.5, 21.6, 21.5(2×CH<sub>3</sub>).

ESI-HRMS: *m/z* calcd for C<sub>29</sub>H<sub>28</sub> [M+H]<sup>+</sup>: 377.2264; found: 377.2266.

GC-MS *m/z*: 376

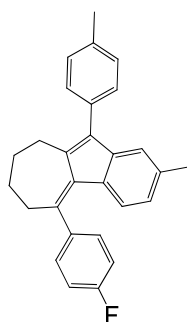

**5-(4-fluorophenyl)-2-methyl-10-(*p*-tolyl)-6,7,8,9-tetrahydrobenzo[*a*]azulene (3ab):** yellow solid, 44 mg, yield: 58%, melting point: 202 °C.

<sup>1</sup>H NMR (400 MHz, CHLOROFORM-*D*) δ 7.40 - 7.26 (m, 6H), 7.12 (t, *J* = 8.7 Hz, 2H), 6.97 (s, 1H), 6.61 (d, *J* = 7.8 Hz, 1H), 6.18 (d, *J* = 7.8 Hz, 1H), 2.88 - 2.81 (m, 2H), 2.81 - 2.73 (m, 2H), 2.43 (s, 3H), 2.24 (s, 3H), 2.05 - 1.95 (m, 2H), 1.87 - 1.77 (m, 2H).

<sup>13</sup>C NMR (101 MHz, CHLOROFORM-*D*) δ 162.6 (d, *J* = 246.8 Hz), 148.6, 143.9, 140.7 (d, *J* = 3.4 Hz), 139.8, 139.7, 139.6, 137.1, 136.6, 133.2, 132.5, 130.1 (d, *J* = 7.8 Hz, 2×CH), 129.5(2×CH), 129.3(2×CH), 124.9, 122.6, 120.1, 115.8 (d, *J* = 21.2 Hz, 2×CH), 36.2, 26.9, 25.6, 25.4, 21.6, 21.5.

ESI-HRMS: *m/z* calcd for C<sub>28</sub>H<sub>25</sub>F [M+H]<sup>+</sup>: 381.2013; found: 381.2015.

GC-MS *m/z*: 380

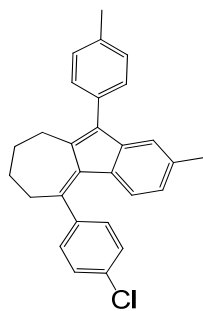

**5-(4-chlorophenyl)-2-methyl-10-(*p*-tolyl)-6,7,8,9-tetrahydrobenzo[*a*]azulene (3ac):**

yellow solid, 45 mg, yield: 57%, melting point: 180 °C.

<sup>1</sup>H NMR (400 MHz, CHLOROFORM-D) δ 7.43 - 7.28 (m, 8H), 6.96 (s, 1H), 6.62 (d, J = 7.9 Hz, 1H), 6.23 (d, J = 7.9 Hz, 1H), 2.86 - 2.80 (m, 2H), 2.74 - 2.80 (m, 2H), 2.43 (s, 3H), 2.24 (s, 3H), 2.05 - 1.96 (m, 2H), 1.87 - 1.77 (m, 2H).

<sup>13</sup>C NMR (101 MHz, CHLOROFORM-D) δ 148.2, 143.9, 143.2, 139.9, 139.7, 139.7, 137.1, 136.7, 133.7, 133.0, 132.5, 129.8(2×CH), 129.5(2×CH), 129.3(2×CH), 129.1(2×CH), 125.0, 122.6, 120.1, 36.0, 26.9, 25.6, 25.4, 21.6, 21.5.

ESI-HRMS: m/z calcd for C<sub>28</sub>H<sub>25</sub>Cl [M+H]<sup>+</sup>: 397.1718; found: 397.1717.

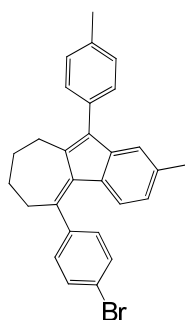

**5-(4-bromophenyl)-2-methyl-10-(*p*-tolyl)-6,7,8,9-tetrahydrobenzo[*a*]azulene (3ad):**

yellow solid, 52 mg, yield: 59%, melting point: 172 °C.

<sup>1</sup>H NMR (400 MHz, CHLOROFORM-D) δ 7.60 - 7.53 (m, 2H), 7.31 (dd, J = 15.4, 7.3 Hz, 4H), 7.26 - 7.23 (m, 2H), 6.96 (s, 1H), 6.63 (d, J = 7.8 Hz, 1H), 6.23 (d, J = 7.8 Hz, 1H), 2.87 - 2.80 (m, 2H), 2.80 - 2.73 (m, 2H), 2.43 (s, 3H), 2.24 (s, 3H), 2.05 - 1.96 (m, 2H), 1.86 - 1.77 (m, 2H).

<sup>13</sup>C NMR (101 MHz, CHLOROFORM-D) δ 148.1, 144.0, 143.7, 139.8, 139.8, 139.7, 137.1, 136.7, 133.0, 132.5, 132.0(2×CH), 130.1(2×CH), 129.5(2×CH), 129.3(2×CH), 125.0, 122.6, 121.9, 120.1, 36.0, 26.9, 25.6, 25.4, 21.6, 21.5.

ESI-HRMS: m/z calcd for C<sub>28</sub>H<sub>25</sub>Br [M+H]<sup>+</sup>: 443.1196; found: 443.1197.

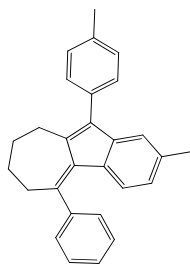

**2-methyl-5-phenyl-10-(*p*-tolyl)-6,7,8,9-tetrahydrobenzo[*a*]azulene (3ae)**: yellow solid, 45 mg, yield: 62% , melting point: 192°C.

<sup>1</sup>H NMR (400 MHz, CHLOROFORM-D) δ 7.45 - 7.26 (m, 9H), 6.96 (s, 1H), 6.57 (d, *J* = 7.8 Hz, 1H), 6.15 (d, *J* = 7.8 Hz, 1H), 2.91 - 2.84 (m, 2H), 2.82 - 2.75 (m, 2H), 2.42 (s, 3H), 2.22 (s, 3H), 2.06 - 1.97 (m, 2H), 1.88 - 1.78 (m, 2H).

<sup>13</sup>C NMR (101 MHz, CHLOROFORM-D) δ 150.0, 144.9, 143.9, 139.9, 139.4, 139.4, 137.0, 136.4, 133.3, 132.7, 129.5(2×CH), 129.3(2×CH), 128.8(2×CH), 128.2(2×CH), 127.8, 124.8, 122.7, 119.9, 36.2, 26.9, 25.7, 25.5, 21.6, 21.5.

ESI-HRMS: *m/z* calcd for C<sub>28</sub>H<sub>26</sub> [M+H]<sup>+</sup>: 363.2107; found: 363.2108.

GC-MS *m/z*: 362

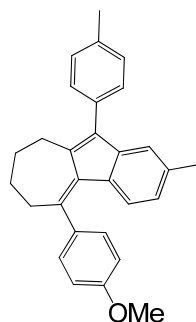

**5-(4-methoxyphenyl)-2-methyl-10-(*p*-tolyl)-6,7,8,9-tetrahydrobenzo[*a*]azulene (3af)**: yellow solid, 34.5 mg, yield: 44%, melting point: 108°C.

<sup>1</sup>H NMR (400 MHz, CHLOROFORM-D) δ 7.28 - 7.39 (m, 6H), 7.02 - 6.95 (m, 3H), 6.63 (dd, *J* = 7.8, 0.7 Hz, 1H), 6.33 (d, *J* = 7.8 Hz, 1H), 3.90 (s, 3H), 2.92 - 2.85 (m, 2H), 2.83 - 2.76 (m, 2H), 2.45 (s, 3H), 2.26 (s, 3H), 2.07 - 1.97 (m, 2H), 1.89 - 1.80 (m, 2H).

<sup>13</sup>C NMR (101 MHz, CHLOROFORM-D) δ 159.5, 150.0, 143.8, 139.8, 139.3, 139.1, 137.0, 136.9, 136.2, 133.4, 132.8, 129.9(2×CH), 129.5(2×CH), 129.2(2×CH), 124.8, 122.6, 119.9, 114.2(2×CH), 55.5, 36.2, 26.8, 25.6(2×CH<sub>2</sub>), 21.6, 21.5.

ESI-HRMS: *m/z* calcd for C<sub>29</sub>H<sub>28</sub>O [M+H]<sup>+</sup>: 393.2213; found: 393.2211.

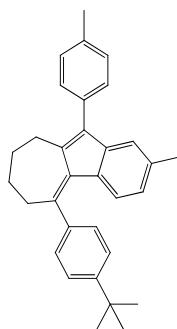

**5-(4-(tert-butyl)phenyl)-2-methyl-10-(p-tolyl)-6,7,8,9-tetrahydrobenzo[a]azulene**

**(3ag)**: yellow solid, 33.5 mg, yield: 40%, melting point: 139°C.

<sup>1</sup>H NMR (400 MHz, CHLOROFORM-D) δ 7.43 (d, 2H), 7.34 (d, 2H), 7.31 - 7.26 (m, 4H), 6.96 (s, 1H), 6.59 (d, *J* = 7.8 Hz, 1H), 6.20 (d, *J* = 7.8 Hz, 1H), 2.90 - 2.85 (m, 2H), 2.81 - 2.75 (m, 2H), 2.42 (s, 3H), 2.22 (s, 3H), 2.05 - 1.96 (m, 2H), 1.86 - 1.78 (m, 2H), 1.39 (s, 9H).

<sup>13</sup>C NMR (101 MHz, CHLOROFORM-D) δ 151.0, 150.4, 143.8, 141.8, 139.9, 139.3, 139.1, 136.9, 136.2, 133.4, 132.8, 129.5(2×CH), 129.2(2×CH), 128.0(2×CH), 125.6(2×CH), 124.8, 122.7, 119.8, 36.2, 34.8, 31.6(3×CH<sub>3</sub>), 26.9, 25.7, 25.5, 21.6, 21.5.

ESI-HRMS: *m/z* calcd for C<sub>32</sub>H<sub>34</sub> [M+H]<sup>+</sup>: 419.2733; found: 419.2734.

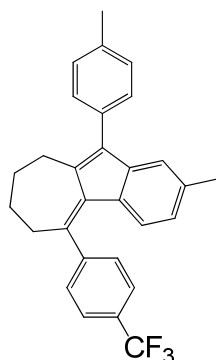

**2-methyl-10-(p-tolyl)-5-(4-(trifluoromethyl)phenyl)-6,7,8,9-tetrahydrobenzo[a]azulene**

**(3ah)**: yellow solid, 48 mg, yield: 56%, melting point: 141 °C.

<sup>1</sup>H NMR (400 MHz, CHLOROFORM-D) δ 7.68 (d, *J* = 8.0 Hz, 2H), 7.47 (d, *J* = 8.0 Hz, 2H), 7.31 (q, *J* = 8.0 Hz, 4H), 6.96 (s, 1H), 6.60 (d, *J* = 7.8 Hz, 1H), 6.09 (d, *J* = 7.8 Hz, 1H), 2.87 - 2.81 (m, 2H), 2.81 - 2.75 (m, 2H), 2.43 (s, 3H), 2.23 (s, 3H), 2.07 - 1.97 (m, 2H), 1.87 - 1.79 (m, 2H).

<sup>13</sup>C NMR (101 MHz, CHLOROFORM-D) δ 148.6, 147.5, 144.1, 140.1, 140.1, 139.6, 137.2, 136.9, 132.9, 132.4, 129.9 (q, *J* = 32.6 Hz), 129.5(2×CH), 129.3(2×CH), 128.7(2×CH), 125.9 (q, *J* = 3.5 Hz, 2×CH), 125.0, 124.4 (q, *J* = 272.2 Hz), 122.6, 120.2, 35.9, 27.0, 25.7, 25.3, 21.6, 21.5.

ESI-HRMS: *m/z* calcd for C<sub>29</sub>H<sub>25</sub>F<sub>3</sub> [M+H]<sup>+</sup>: 431.1981; found: 431.1980.

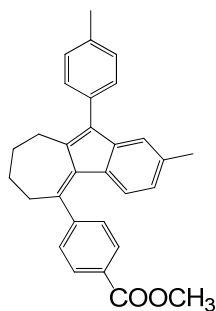

**methyl 4-(2-methyl-10-(*p*-tolyl)-6,7,8,9-tetrahydrobenzo[*a*]azulen-5-yl)benzoate (3ai):** yellow solid, 54 mg, yield: 64%, melting point: 136°C.

$^1\text{H}$  NMR (400 MHz, CHLOROFORM- $\text{D}$ )  $\delta$  8.11 (d,  $J = 8.3$  Hz, 2H), 7.45 (d,  $J = 8.3$  Hz, 2H), 7.36 - 7.27 (m, 4H), 6.95 (s, 1H), 6.57 (d,  $J = 7.8$  Hz, 1H), 6.12 (d,  $J = 7.8$  Hz, 1H), 3.97 (s, 3H), 2.91 - 2.82 (m, 2H), 2.82 - 2.74 (m, 2H), 2.44 (s, 3H), 2.23 (s, 3H), 2.08 - 1.96 (m, 2H), 1.88 - 1.79 (m, 2H).

$^{13}\text{C}$  NMR (101 MHz, CHLOROFORM- $\text{D}$ )  $\delta$  167.1, 149.8, 148.2, 144.0, 140.0, 139.9, 139.7, 137.2, 136.8, 132.9, 132.4, 130.2(2 $\times$ CH), 129.5(2 $\times$ CH), 129.4, 129.3(2 $\times$ CH), 128.4(2 $\times$ CH), 125.0, 122.7, 120.1, 52.4, 35.8, 27.0, 25.7, 25.3, 21.6, 21.5.

ESI-HRMS:  $m/z$  calcd for  $\text{C}_{30}\text{H}_{28}\text{O}_2$   $[\text{M}+\text{H}]^+$ : 421.2162; found: 421.2160.

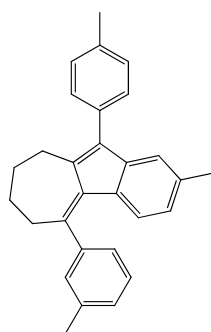

**2-methyl-5-(*m*-tolyl)-10-(*p*-tolyl)-6,7,8,9-tetrahydrobenzo[*a*]azulene (3aj):** yellow solid, 37.5 mg, yield: 50%, melting point: 161°C.

$^1\text{H}$  NMR (400 MHz, CHLOROFORM- $\text{D}$ )  $\delta$  7.37 - 7.27 (m, 5H), 7.23 - 7.13 (m, 3H), 6.96 (s, 1H), 6.59 (d,  $J = 7.9$  Hz, 1H), 6.19 (d,  $J = 7.9$  Hz, 1H), 2.91 - 2.84 (m, 2H), 2.81 - 2.75 (m, 2H), 2.43 (s, 3H), 2.39 (s, 3H), 2.23 (s, 3H), 2.06 - 1.97 (m, 2H), 1.87 - 1.78 (m, 2H).

$^{13}\text{C}$  NMR (101 MHz, CHLOROFORM- $\text{D}$ )  $\delta$  150.3, 144.9, 143.8, 139.9, 139.2, 138.4, 137.0, 136.3, 133.3, 132.7, 129.5(2 $\times$ CH), 129.2(2 $\times$ CH), 128.8, 128.7, 128.5, 125.2, 124.8, 122.7, 119.9, 36.2, 26.9, 25.7, 25.5, 21.6(2 $\times$ CH $_3$ ), 21.5.

ESI-HRMS:  $m/z$  calcd for  $\text{C}_{29}\text{H}_{28}$   $[\text{M}+\text{H}]^+$ : 377.2264; found: 377.2266.

GC-MS  $m/z$ : 376

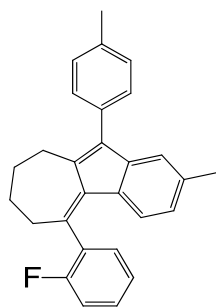

**5-(2-fluorophenyl)-2-methyl-10-(*p*-tolyl)-6,7,8,9-tetrahydrobenzo[*a*]azulene (3ak):** yellow solid, 22 mg, yield: 29%, melting point: 187°C.

<sup>1</sup>H NMR (400 MHz, CHLOROFORM-*D*) δ 7.43 - 7.28 (m, 6H), 7.22 - 7.16 (m, 2H), 6.95 (s, 1H), 6.60 (d, *J* = 7.9 Hz, 1H), 6.15 (d, *J* = 7.9 Hz, 1H), 2.87 - 2.72 (m, 4H), 2.43 (s, 3H), 2.23 (s, 3H), 2.09 - 1.99 (m, 2H), 1.89 - 1.78 (m, 2H).

<sup>13</sup>C NMR (101 MHz, CHLOROFORM-*D*) δ 159.2 (d, *J* = 246.2 Hz), 144.1, 143.2, 140.8, 139.8, 137.1, 136.7, 133.0, 132.4 (d, *J* = 21.6 Hz), 130.7, 130.6, 129.6 (d, *J* = 7.6 Hz), 129.5(2×CH), 129.3(2×CH), 125.0, 124.5, 124.5, 122.2, 120.1, 116.3 (d, *J* = 21.8 Hz), 35.0, 26.7, 25.6, 25.2, 21.6, 21.5.

ESI-HRMS: *m/z* calcd for C<sub>28</sub>H<sub>25</sub>F [M+H]<sup>+</sup>: 381.2013; found: 381.2015.

GC-MS *m/z*: 380

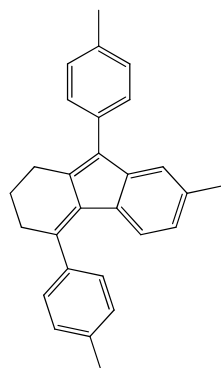

**7-methyl-4,9-di-*p*-tolyl-2,3-dihydro-1H-fluorene (3ba):** yellow solid, 58 mg, yield: 80%, melting point: 125°C.

<sup>1</sup>H NMR (400 MHz, CHLOROFORM-*D*) δ 7.39 (d, *J* = 8.0 Hz, 2H), 7.34 - 7.21 (m, 6H), 7.09 (s, 1H), 6.73 (d, *J* = 7.7 Hz, 1H), 6.65 (d, *J* = 7.7 Hz, 1H), 2.79 - 2.73 (m, 2H), 2.69 (t, *J* = 5.9 Hz, 2H), 2.43 (s, 3H), 2.41 (s, 3H), 2.27 (s, 3H), 2.00 - 1.91 (m, 2H).

<sup>13</sup>C NMR (101 MHz, CHLOROFORM-*D*) δ 145.2, 144.1, 139.2, 137.8, 136.7, 136.7, 135.6, 135.3, 134.8, 132.6, 131.8, 129.4(2×CH), 129.2 (2×CH), 129.0(2×CH), 128.2(2×CH), 124.6, 122.4, 119.8, 34.8, 24.8, 24.1, 21.8, 21.5, 21.4.

ESI-HRMS: *m/z* calcd for C<sub>28</sub>H<sub>26</sub> [M+H]<sup>+</sup>: 363.2107; found: 363.2107.

GC-MS *m/z*: 362

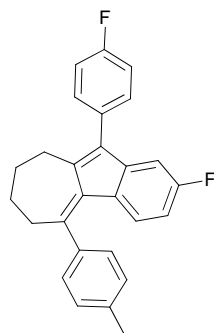

**2-fluoro-10-(4-fluorophenyl)-5-(*p*-tolyl)-6,7,8,9-tetrahydrobenzo[*a*]azulene 3ca:**

yellow solid, 32 mg, yield: 42%, melting point: 187 °C.

<sup>1</sup>H NMR (400 MHz, CHLOROFORM-D) δ 7.45 - 7.37 (m, 2H), 7.28 (s, 4H), 7.23 - 7.15 (m, 2H), 6.85 - 6.78 (m, 1H), 6.54 - 6.46 (m, 1H), 6.39 - 6.36 (m, 1H), 2.94 - 2.88 (m, 2H), 2.79 (t, *J* = 6.0 Hz, 2H), 2.48 (s, 3H), 2.09 - 2.00 (m, 2H), 1.91 - 1.82 (m, 2H).

<sup>13</sup>C NMR (101 MHz, CHLOROFORM-D) δ 162.3 (d, *J* = 246.6 Hz, 2×C), 152.0, 145.2 (d, *J* = 8.2 Hz), 141.8, 141.3, 138.2, 138.1, 137.5, 131.6, 131.1 (d, *J* = 7.9 Hz, 2×CH, C), 129.6 (2×CH), 128.1 (2×CH), 123.9 (d, *J* = 8.6 Hz), 115.7 (d, *J* = 21.3 Hz, 2×CH), 110.5 (d, *J* = 22.5 Hz), 106.0 (d, *J* = 23.6 Hz), 36.3, 26.7, 25.7, 25.3, 21.5.

ESI-HRMS: *m/z* calcd for C<sub>27</sub>H<sub>22</sub>F<sub>2</sub> [M+H]<sup>+</sup>: 385.1762; found: 385.1764.

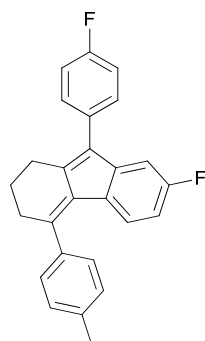

**7-fluoro-9-(4-fluorophenyl)-4-(*p*-tolyl)-2,3-dihydro-1H-fluorene 3da:** yellow solid, 63 mg, yield: 85%, melting point: 202 °C.

<sup>1</sup>H NMR (400 MHz, CHLOROFORM-D) δ 7.45 - 7.38 (m, 2H), 7.32 - 7.24 (m, 4H), 7.19 - 7.11 (m, 2H), 6.91 (d, *J* = 9.3 Hz, 1H), 6.80 - 6.72 (m, 1H), 6.57 - 6.49 (m, 1H), 2.78 - 2.68 (m, 4H), 2.44 (s, 3H), 2.03 - 1.93 (m, 2H).

<sup>13</sup>C NMR (101 MHz, CHLOROFORM-D) δ 162.7 (d, *J* = 243.8 Hz), 162.1 (d, *J* = 246.5 Hz), 147.0, 145.7 (d, *J* = 8.5 Hz), 138.6, 138.2, 137.6, 134.3, 133.3 (d, *J* = 1.7 Hz), 130.9 (d, *J* = 2.9 Hz), 130.5 (d, *J* = 7.9 Hz, 2×CH), 130.1, 129.5 (2×CH), 128.0 (2×CH), 123.6 (d, *J* = 8.9 Hz), 115.6 (d, *J* = 21.3 Hz, 2×CH), 110.3 (d, *J* = 22.8 Hz), 106.1 (d, *J* = 23.9 Hz), 34.8, 24.6, 24.1, 21.5.

ESI-HRMS: *m/z* calcd for C<sub>26</sub>H<sub>20</sub>F<sub>2</sub> [M+H]<sup>+</sup>: 371.1606; found: 371.1607.



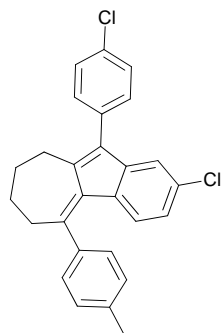

**2-chloro-10-(4-chlorophenyl)-5-(*p*-tolyl)-6,7,8,9-tetrahydrobenzo[*a*]azulene 3ea:** yellow solid, 32 mg, yield: 38%, melting point: 165 °C.

$^1\text{H}$  NMR (400 MHz, CHLOROFORM-*D*)  $\delta$  7.45 (d,  $J$  = 8.3 Hz, 2H), 7.34 (d,  $J$  = 8.3 Hz, 2H), 7.25 (s, 4H), 7.06 (d,  $J$  = 2.0 Hz, 1H), 6.77 - 6.73 (m, 1H), 6.26 (d,  $J$  = 8.3 Hz, 1H), 2.92 - 2.86 (m, 2H), 2.79 - 2.73 (m, 2H), 2.45 (s, 3H), 2.04 - 1.97 (m, 2H), 1.88 - 1.79 (m, 2H).

$^{13}\text{C}$  NMR (101 MHz, CHLOROFORM-*D*)  $\delta$  153.5, 144.6, 141.8, 141.1, 138.3 (2 $\times$ C), 137.2, 134.1, 133.4, 133.4, 132.3, 130.8 (2 $\times$ CH), 129.7(2 $\times$ CH), 129.0(2 $\times$ CH), 128.1(2 $\times$ CH), 124.0, 123.8, 118.9, 36.5, 26.7, 25.7, 25.3, 21.5.

ESI-HRMS:  $m/z$  calcd for  $\text{C}_{27}\text{H}_{22}\text{Cl}_2$   $[\text{M}+\text{H}]^+$ : 417.1171; found: 417.1170.

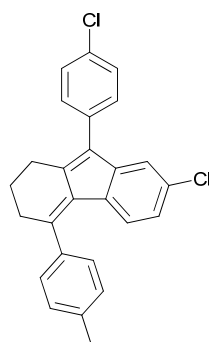

**7-chloro-9-(4-chlorophenyl)-4-(*p*-tolyl)-2,3-dihydro-1H-fluorene 3fa:** yellow solid, yield: 66% or 85% when use 2.4 eq. iodonium salt, melting point: 204 °C.

$^1\text{H}$  NMR (400 MHz, CHLOROFORM-*D*)  $\delta$  7.46 (d,  $J$  = 8.3 Hz, 2H), 7.40 (d,  $J$  = 8.3 Hz, 2H), 7.33 - 7.26 (m, 4H), 7.20 (s, 1H), 6.83 (d,  $J$  = 8.1 Hz, 1H), 6.76 (d,  $J$  = 8.1 Hz, 1H), 2.79 - 2.71 (m, 4H), 2.46 (s, 3H), 2.04 - 1.96 (m, 2H).

$^{13}\text{C}$  NMR (101 MHz, CHLOROFORM-*D*)  $\delta$  148.3, 145.0, 138.5, 138.4, 137.6, 134.4, 133.3, 133.1, 133.0, 132.8, 132.5, 130.3 (2 $\times$ CH), 129.5 (2 $\times$ CH), 128.9 (2 $\times$ CH), 128.0 (2 $\times$ CH), 123.8, 123.5, 118.9, 34.9, 24.5, 24.0, 21.5.

ESI-HRMS:  $m/z$  calcd for  $\text{C}_{26}\text{H}_{20}\text{Cl}_2$   $[\text{M}+\text{H}]^+$ : 403.1015; found: 403.1017.

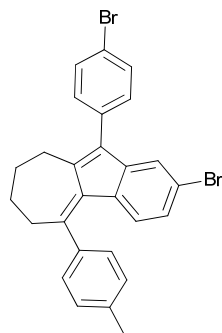

**2-bromo-10-(4-bromophenyl)-5-(*p*-tolyl)-6,7,8,9-tetrahydrobenzo[*a*]azulene 3ga:**

yellow solid, 36 mg, yield: 36%, melting point: 198 °C.

<sup>1</sup>H NMR (400 MHz, CHLOROFORM-D) δ 7.61 (d, *J* = 8.3 Hz, 2H), 7.30 - 7.19 (m, 7H), 6.90 (dd, *J* = 8.2, 4.1 Hz, 1H), 6.21 (d, *J* = 8.2 Hz, 1H), 2.91 - 2.85 (m, 2H), 2.79 - 2.73 (m, 2H), 2.44 (s, 3H), 2.05 - 1.96 (m, 2H), 1.87 - 1.78 (m, 2H).

<sup>13</sup>C NMR (101 MHz, CHLOROFORM-D) δ 153.8, 144.8, 141.6, 141.1, 138.4, 138.3, 137.2, 134.5, 133.9, 131.9 (2×CH), 131.2 (2×CH), 129.7 (2×CH), 128.1 (2×CH), 126.9, 124.2, 121.8, 121.6, 120.5, 36.5, 26.6, 25.7, 25.3, 21.5.

ESI-HRMS: *m/z* calcd for C<sub>27</sub>H<sub>22</sub>Br<sub>2</sub> [M+H]<sup>+</sup>: 507.0142; found: 507.0141.

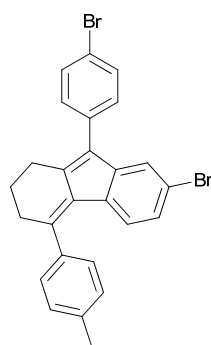

**7-bromo-9-(4-bromophenyl)-4-(*p*-tolyl)-2,3-dihydro-1H-fluorene 3ha:** yellow solid, 63 mg, yield: 64%, melting point: 197 °C.

<sup>1</sup>H NMR (301 MHz, CHLOROFORM-D) δ 7.59 (d, *J* = 8.2 Hz, 2H), 7.36 - 7.24 (m, 7H), 6.96 (d, *J* = 8.2 Hz, 1H), 6.69 (d, *J* = 8.2 Hz, 1H), 2.79 - 2.66 (m, 4H), 2.44 (s, 3H), 2.03 - 1.87 (m, 2H).

<sup>13</sup>C NMR (76 MHz, CHLOROFORM-D) δ 148.6, 145.2, 138.5, 138.4, 137.5, 134.5, 133.7, 133.0 (2×C), 131.9 (2×CH), 130.6 (2×CH), 129.5 (2×CH), 128.0 (2×CH), 126.7, 123.9, 121.8, 121.3, 121.0, 34.9, 24.5, 24.0, 21.5.

ESI-HRMS: *m/z* calcd for C<sub>26</sub>H<sub>20</sub>Br<sub>2</sub> [M+H]<sup>+</sup>: 492.9986; found: 492.9988.

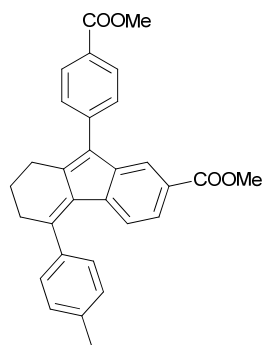

**methyl 9-(4-(methoxycarbonyl)phenyl)-4-(p-tolyl)-2,3-dihydro-1H-fluorene-7-carboxylate 3ia**: yellow solid, 17 mg, yield: 19%, melting point: 173 °C.

$^1\text{H}$  NMR (400 MHz, CHLOROFORM- $\text{D}$ )  $\delta$  8.17 (d,  $J$  = 8.1 Hz, 2H), 7.91 (s, 1H), 7.62 - 7.55 (m, 3H), 7.31 (q,  $J$  = 8.1 Hz, 4H), 6.91 (d,  $J$  = 8.1 Hz, 1H), 3.96 (s, 3H), 3.85 (s, 3H), 2.85 - 2.75 (m, 4H), 2.46 (s, 3H), 2.06 - 1.97 (m, 2H).

$^{13}\text{C}$  NMR (101 MHz, CHLOROFORM- $\text{D}$ )  $\delta$  167.6, 167.2, 150.7, 143.1, 139.9, 138.7, 138.6, 138.3, 137.9, 134.9, 133.7, 130.0(2 $\times$ CH), 129.6(2 $\times$ CH), 129.0(2 $\times$ CH), 128.9, 128.4, 128.0(2 $\times$ CH), 126.0, 122.4, 119.7, 52.3, 52.1, 35.2, 24.4, 24.1, 21.6.

ESI-HRMS:  $m/z$  calcd for  $\text{C}_{30}\text{H}_{26}\text{O}_4$   $[\text{M}+\text{H}]^+$ : 451.1904; found: 451.1905.

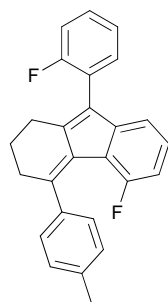

**5-fluoro-9-(2-fluorophenyl)-4-(p-tolyl)-2,3-dihydro-1H-fluorene 3ja**: yellow solid, 27 mg, yield: 36%, melting point: 192 °C.

$^1\text{H}$  NMR (400 MHz, CHLOROFORM- $\text{D}$ )  $\delta$  7.47 - 7.34 (m, 2H), 7.32 - 7.19 (m, 6H), 7.15 - 7.08 (m, 1H), 6.93 (d,  $J$  = 7.4 Hz, 1H), 6.68 - 6.61 (m, 1H), 2.82 (t,  $J$  = 5.9 Hz, 2H), 2.66 (s, 2H), 2.44 (s, 3H), 2.06 - 1.95 (m, 2H).

$^{13}\text{C}$  NMR (101 MHz, CHLOROFORM- $\text{D}$ )  $\delta$  160.3 (d,  $J$  = 247.3 Hz), 157.2 (d,  $J$  = 254.0 Hz), 149.5, 146.8 (d,  $J$  = 6.2 Hz), 140.6 (d,  $J$  = 4.5 Hz), 139.5, 137.8, 133.4 (d,  $J$  = 4.6 Hz), 131.5 (d,  $J$  = 3.8 Hz), 129.3 (d,  $J$  = 8.0 Hz), 128.9 (d,  $J$  = 1.9 Hz), 128.6 - 128.3 (multi-peaks), 124.1 (d,  $J$  = 3.4 Hz), 122.8 (d,  $J$  = 16.4 Hz), 119.4 (d,  $J$  = 14.9 Hz), 116.2 (d,  $J$  = 22.3 Hz), 115.1, 112.3 (d,  $J$  = 23.8 Hz), 35.6, 24.2 (d,  $J$  = 2.3 Hz), 23.8, 21.5.

ESI-HRMS:  $m/z$  calcd for  $\text{C}_{26}\text{H}_{20}\text{F}_2$   $[\text{M}+\text{H}]^+$ : 371.1606; found: 371.1607.

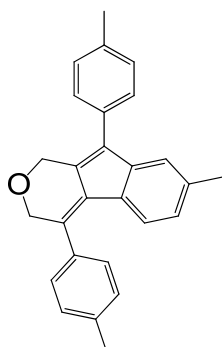

**7-methyl-4,9-di-p-tolyl-1,3-dihydroindeno[2,1-c]pyran (3la)**: orange solid, 47.5 mg, yield: 65%, melting point: 105°C.

<sup>1</sup>H NMR (400 MHz, CHLOROFORM-D) δ 7.39 (d, *J* = 8.0 Hz, 2H), 7.33 (d, *J* = 8.0 Hz, 2H), 7.31 - 7.25 (m, 4H), 7.18 (s, 1H), 7.02 (d, *J* = 7.7 Hz, 1H), 6.75 (d, *J* = 7.7 Hz, 1H), 4.85 (s, 2H), 4.57 (s, 2H), 2.44 (s, 3H), 2.42 (s, 3H), 2.31 (s, 3H).

<sup>13</sup>C NMR (101 MHz, CHLOROFORM-D) δ 143.8, 141.1, 139.0, 137.5, 137.4, 134.2, 134.0, 132.7, 131.6, 131.1, 130.8, 129.6(2×CH), 129.5(2×CH), 128.8(2×CH), 128.6(2×CH), 125.3, 122.5, 120.6, 69.8, 64.6, 21.9, 21.6, 21.5.

ESI-HRMS: *m/z* calcd for C<sub>27</sub>H<sub>24</sub>O [M+H]<sup>+</sup>: 365.1900; found: 365.1901.

GC-MS *m/z*: 364

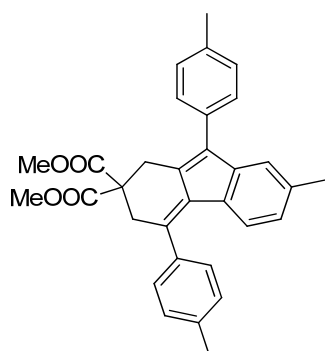

**dimethyl 7-methyl-4,9-di-p-tolyl-1H-fluorene-2,2(3H)-dicarboxylate (3ma)**: yellow solid, 18 mg, yield: 19%, melting point: 70°C.

<sup>1</sup>H NMR (400 MHz, CHLOROFORM-D) δ 7.43 - 7.36 (m, 4H), 7.33 - 7.25 (m, 4H), 7.04 (s, 1H), 6.73 (d, *J* = 7.8 Hz, 1H), 6.67 (d, *J* = 7.8 Hz, 1H), 3.70 (s, 6H), 3.35 (s, 2H), 3.27 (s, 2H), 2.44 (s, 3H), 2.43 (s, 3H), 2.26 (s, 3H).

<sup>13</sup>C NMR (101 MHz, CHLOROFORM-D) δ 171.2(2×C), 144.5, 140.5, 138.2, 137.8, 137.3, 137.2, 137.1, 134.7, 131.9, 131.5, 131.1, 129.4(4×CH), 128.9(2×CH), 128.3(2×CH), 125.1, 122.5, 120.2, 56.9, 53.0(2×CH<sub>3</sub>), 40.1, 29.9, 21.7, 21.6, 21.5.

ESI-HRMS: *m/z* calcd for C<sub>32</sub>H<sub>30</sub>O<sub>4</sub> [M+H]<sup>+</sup>: 479.2217; found: 479.2217.

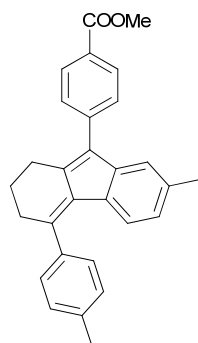

**methyl 4,9-di-p-tolyl-2,3-dihydro-1H-fluorene-7-carboxylate 30a:** yellow solid, melting point: 147 °C.

$^1\text{H}$  NMR (400 MHz, CHLOROFORM-D)  $\delta$  8.14 (d,  $J = 8.2$  Hz, 2H), 7.56 (d,  $J = 8.2$  Hz, 2H), 7.32 (d,  $J = 8.0$  Hz, 2H), 7.26 (d,  $J = 8.0$  Hz, 2H), 7.07 (s, 1H), 6.75 (d,  $J = 7.8$  Hz, 1H), 6.68 (d,  $J = 7.8$  Hz, 1H), 3.95 (s, 3H), 2.81 - 2.75 (m, 2H), 2.74 - 2.69 m, 2H), 2.44 (s, 3H), 2.28 (s, 3H), 2.03 - 1.94 (m, 2H).

$^{13}\text{C}$  NMR (101 MHz, CHLOROFORM-D)  $\delta$  167.2, 146.7, 143.4, 140.6, 138.9, 138.1, 137.2, 136.9, 135.2, 134.0, 131.7, 129.8(2 $\times$ CH), 129.4(2 $\times$ CH), 129.1(2 $\times$ CH), 128.6, 128.1(2 $\times$ CH), 124.9, 122.6, 119.6, 52.3, 34.8, 24.7, 24.2, 21.8, 21.5.

ESI-HRMS:  $m/z$  calcd for  $\text{C}_{29}\text{H}_{26}\text{O}_2$   $[\text{M}+\text{H}]^+$ : 407.2006; found: 407.2008.

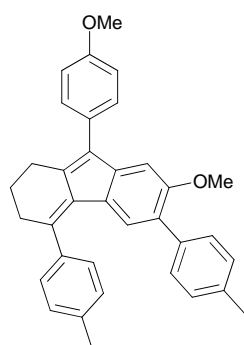

**7-methoxy-9-(4-methoxyphenyl)-4,6-di-p-tolyl-2,3-dihydro-1H-fluorene 4na:**

yellow solid, yield: 22% or 48% when 2.0 eq. iodonium salt was used, melting point: 186 °C.

$^1\text{H}$  NMR (600 MHz, CHLOROFORM-D)  $\delta$  7.46 (d,  $J = 8.6$  Hz, 2H), 7.35 (d,  $J = 7.9$  Hz, 2H), 7.26 - 7.22 (m, 4H), 7.10 (d,  $J = 7.9$  Hz, 2H), 7.04 (d,  $J = 8.6$  Hz, 2H), 6.91 (s, 1H), 6.86 (s, 1H), 3.88 (s, 3H), 3.73 (s, 3H), 2.77 (t,  $J = 6.3$  Hz, 2H), 2.72 (t,  $J = 5.9$  Hz, 2H), 2.39 (s, 3H), 2.33 (s, 3H), 2.01 - 1.95 (m, 2H).

$^{13}\text{C}$  NMR (151 MHz, CHLOROFORM-D)  $\delta$  158.8, 156.3, 144.7, 144.6, 139.0, 138.0, 136.4(2 $\times$ C), 135.9, 135.2, 134.3, 130.2(2 $\times$ CH), 129.4(2 $\times$ CH), 129.3(2 $\times$ CH), 128.6(2 $\times$ CH), 128.3(2 $\times$ CH), 127.9, 127.3, 125.7, 125.1, 114.1(2 $\times$ CH), 102.8, 56.0, 55.5, 34.5, 24.8, 24.3, 21.4, 21.3.

ESI-HRMS:  $m/z$  calcd for  $\text{C}_{35}\text{H}_{32}\text{O}_2$   $[\text{M}+\text{H}]^+$ : 485.2475; found: 485.2478.

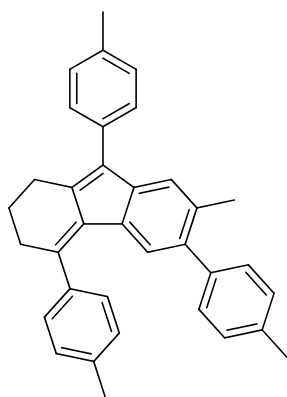

**7-methyl-4,6,9-tri-p-tolyl-2,3-dihydro-1H-fluorene (4ba):** yellow solid, 9 mg, yield: 10 % or 54% when 2.4 eq. iodonium salts were used

$^1\text{H}$  NMR (600 MHz, CHLOROFORM-D)  $\delta$  7.42 (d,  $J = 7.6$  Hz, 2H), 7.34 (d,  $J = 7.6$  Hz, 2H), 7.30 (d,  $J = 7.6$  Hz, 2H), 7.20 (d,  $J = 7.6$  Hz, 2H), 7.18 (s, 1H), 7.12 - 7.04 (m, 4H), 6.83 (s, 1H), 2.78 (t,  $J = 6.1$  Hz, 2H), 2.71 (t,  $J = 5.7$  Hz, 2H), 2.43 (s, 3H), 2.36 (s, 3H), 2.35 (s, 3H), 2.23 (s, 3H), 1.97 (dt,  $J = 13.2, 6.5$  Hz, 2H).

$^{13}\text{C}$  NMR (151 MHz, CHLOROFORM-D)  $\delta$  145.5, 142.9, 139.8, 138.9, 138.0, 137.3, 136.8, 136.0, 135.8, 135.5, 134.6, 134.0, 132.7, 132.4, 129.4(2 $\times$ CH), 129.3(4 $\times$ CH), 129.0(2 $\times$ CH), 128.7(2 $\times$ CH), 128.3(2 $\times$ CH), 124.4, 121.0, 34.7, 24.7, 24.2, 21.5, 21.4, 21.3, 21.2.

ESI-HRMS:  $m/z$  calcd for  $\text{C}_{35}\text{H}_{32}$   $[\text{M}+\text{H}]^+$ : 453.2577; found: 453.2576.

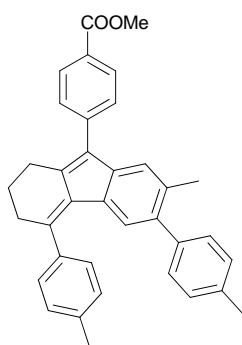

**methyl 4-(7-methyl-4,6-di-p-tolyl-2,3-dihydro-1H-fluoren-9-yl)benzoate 40a:** yellow solid, melting point: 213  $^{\circ}\text{C}$ .

$^1\text{H}$  NMR (400 MHz, CHLOROFORM-D)  $\delta$  8.16 (d,  $J = 8.3$  Hz, 2H), 7.59 (d,  $J = 8.3$  Hz, 2H), 7.34 (d,  $J = 7.8$  Hz, 2H), 7.21 (d,  $J = 7.8$  Hz, 2H), 7.15 (s, 1H), 7.12 (d,  $J = 7.9$  Hz, 2H), 7.05 (d,  $J = 7.9$  Hz, 2H), 6.84 (s, 1H), 3.96 (s, 3H), 2.82 - 2.70 (m, 4H), 2.37 (s, 3H), 2.36 (s, 3H), 2.24 (s, 3H), 2.03 - 1.95 (m, 2H).

$^{13}\text{C}$  NMR (101 MHz, CHLOROFORM-D)  $\delta$  167.2, 146.9, 142.2, 140.7, 139.6, 138.7, 138.2, 137.6, 137.5, 135.9, 135.4, 134.2, 133.8, 132.3, 129.9(2 $\times$ CH), 129.3(4 $\times$ CH), 129.1(2 $\times$ CH), 128.7(2 $\times$ CH), 128.6(2 $\times$ CH), 128.2, 124.5, 120.8, 52.2, 34.7, 24.7, 24.3, 21.5, 21.3, 21.2.

ESI-HRMS:  $m/z$  calcd for  $\text{C}_{36}\text{H}_{32}\text{O}_2$   $[\text{M}+\text{H}]^+$ : 497.2475; found: 497.2473.

## 7. NMR spectra of polycyclic products

### 3aa

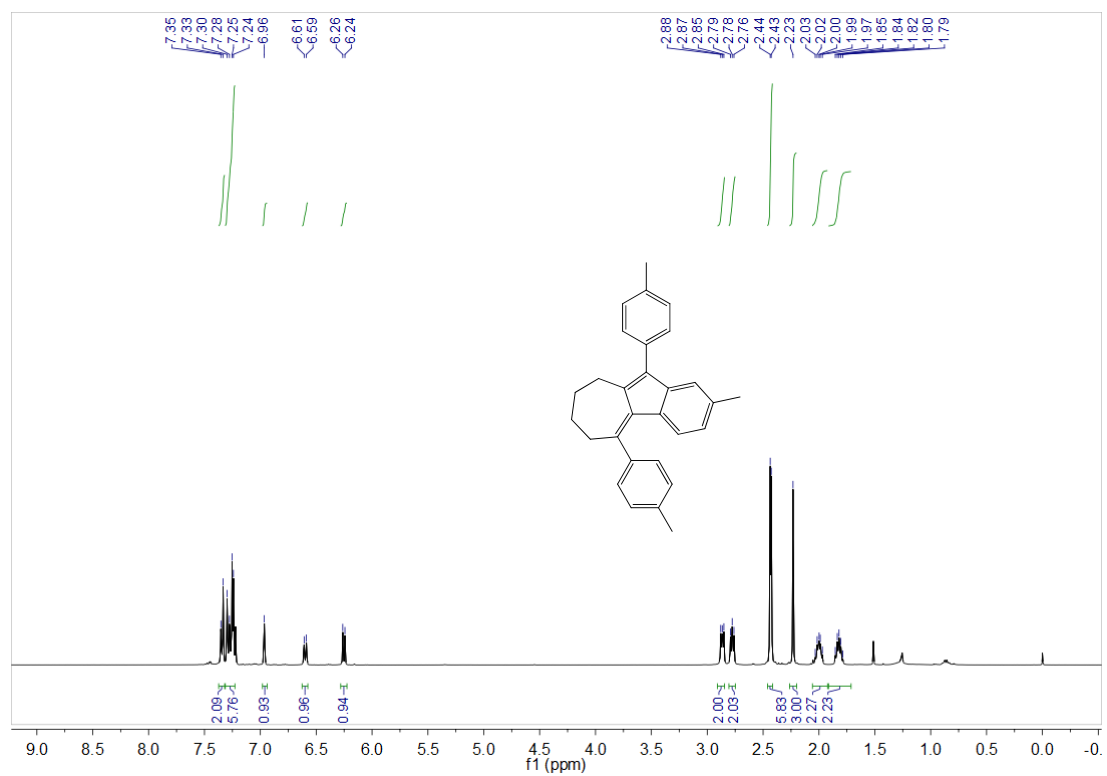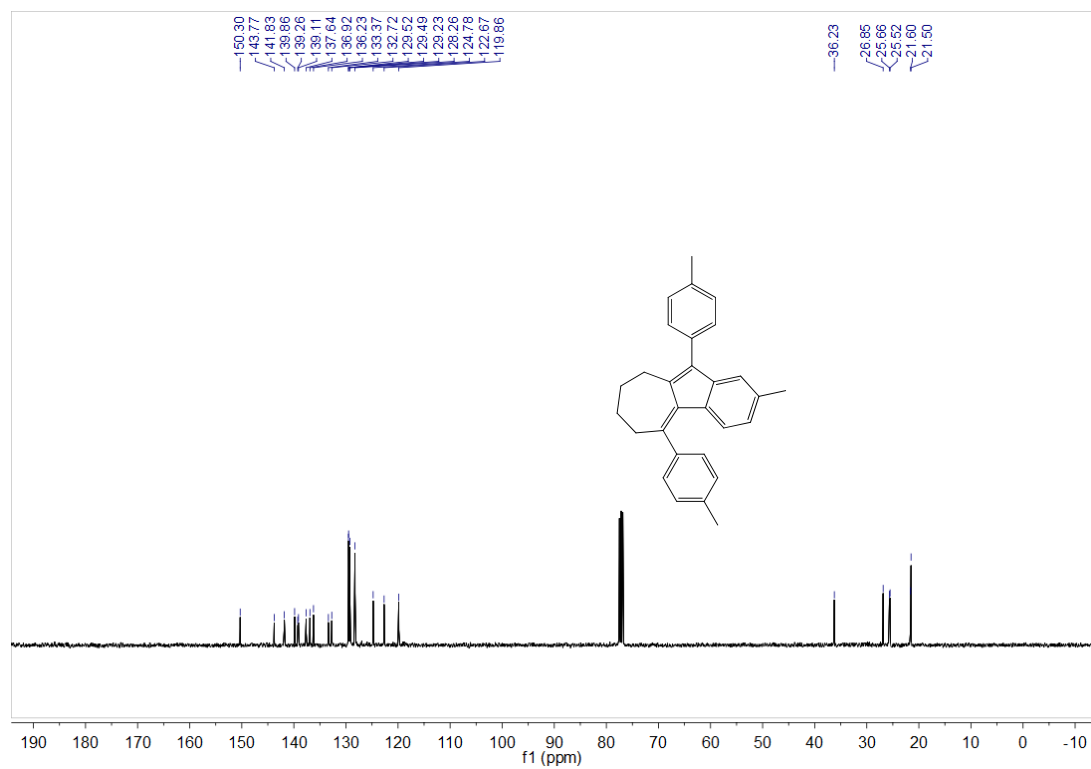

<sup>1</sup>H NMR (400 MHz, CDCl<sub>3</sub>) (up) and <sup>13</sup>C NMR (101 MHz, CDCl<sub>3</sub>) (down)

3ab

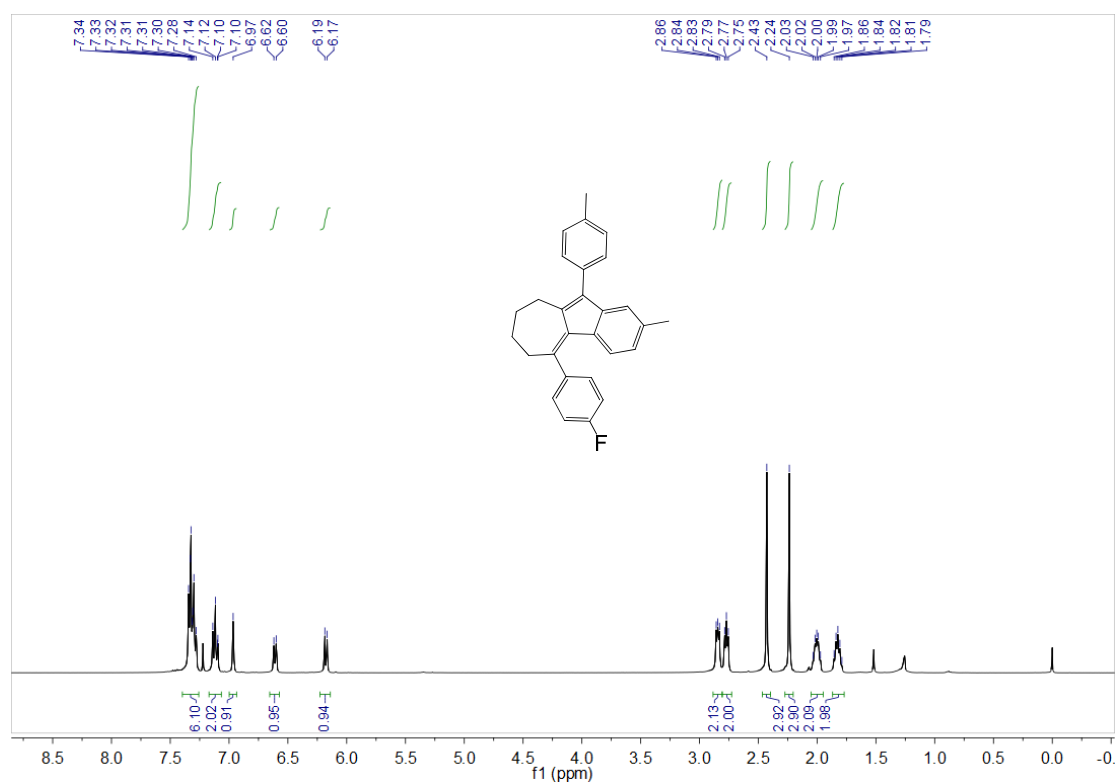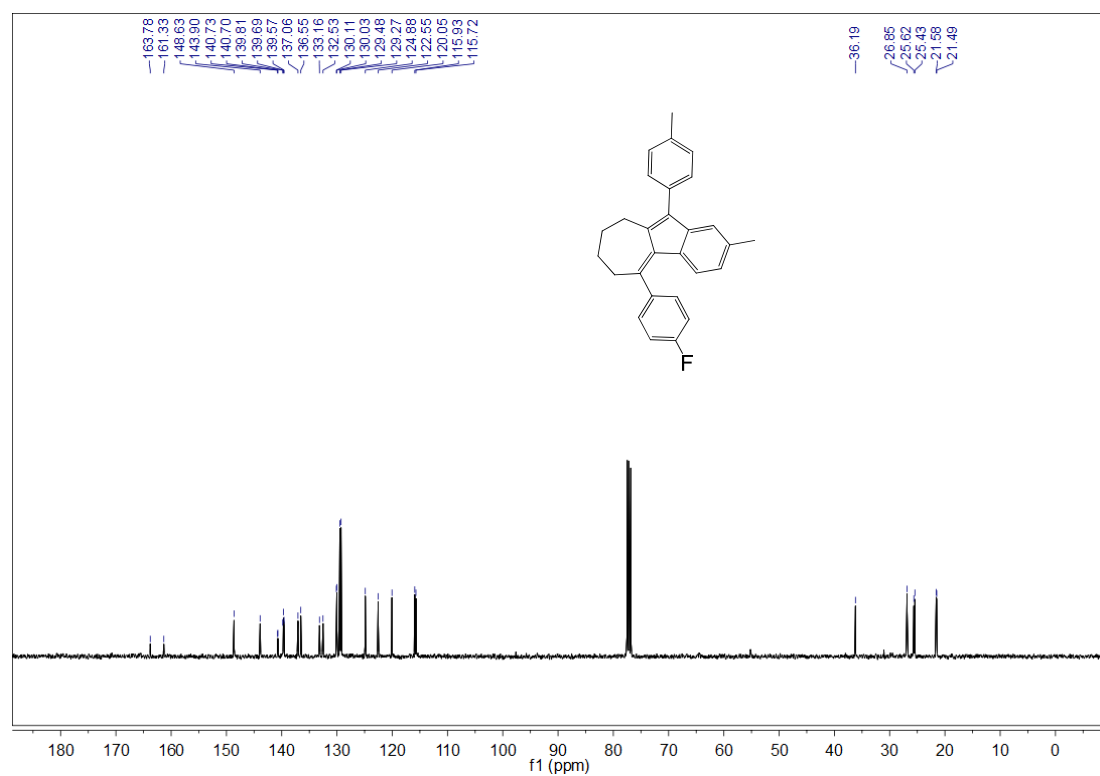

<sup>1</sup>H NMR (400 MHz, CDCl<sub>3</sub>) (up) and <sup>13</sup>C NMR (101 MHz, CDCl<sub>3</sub>) (down)



3ac

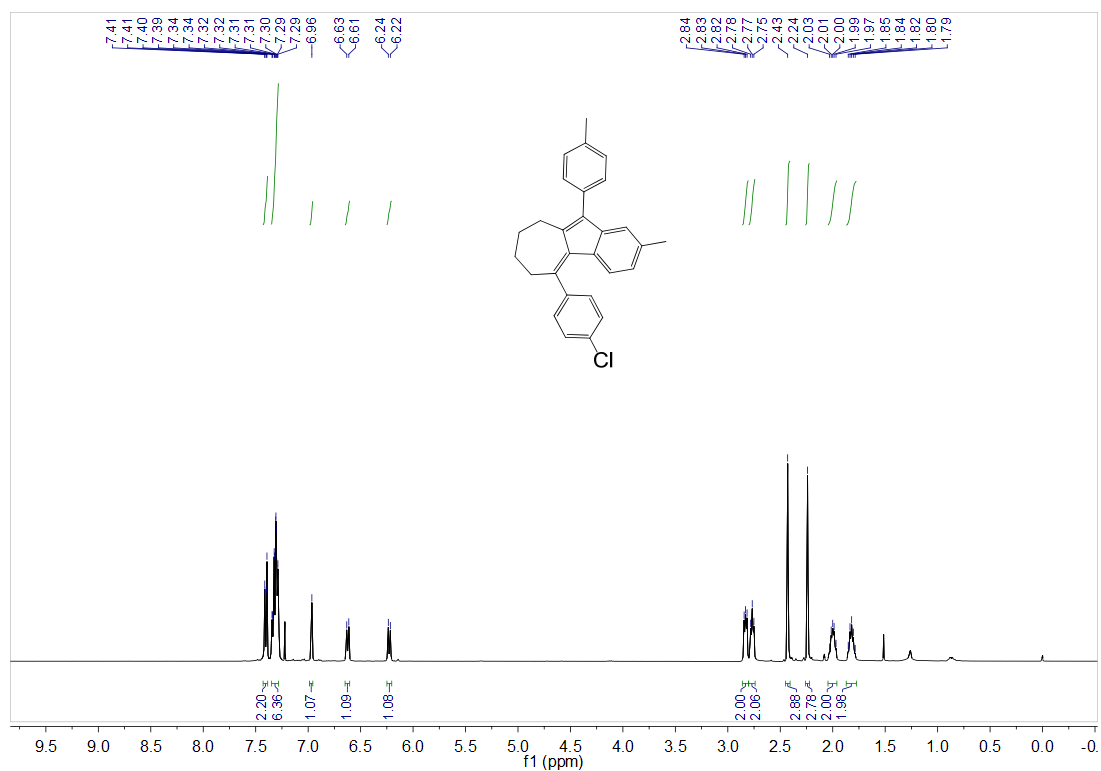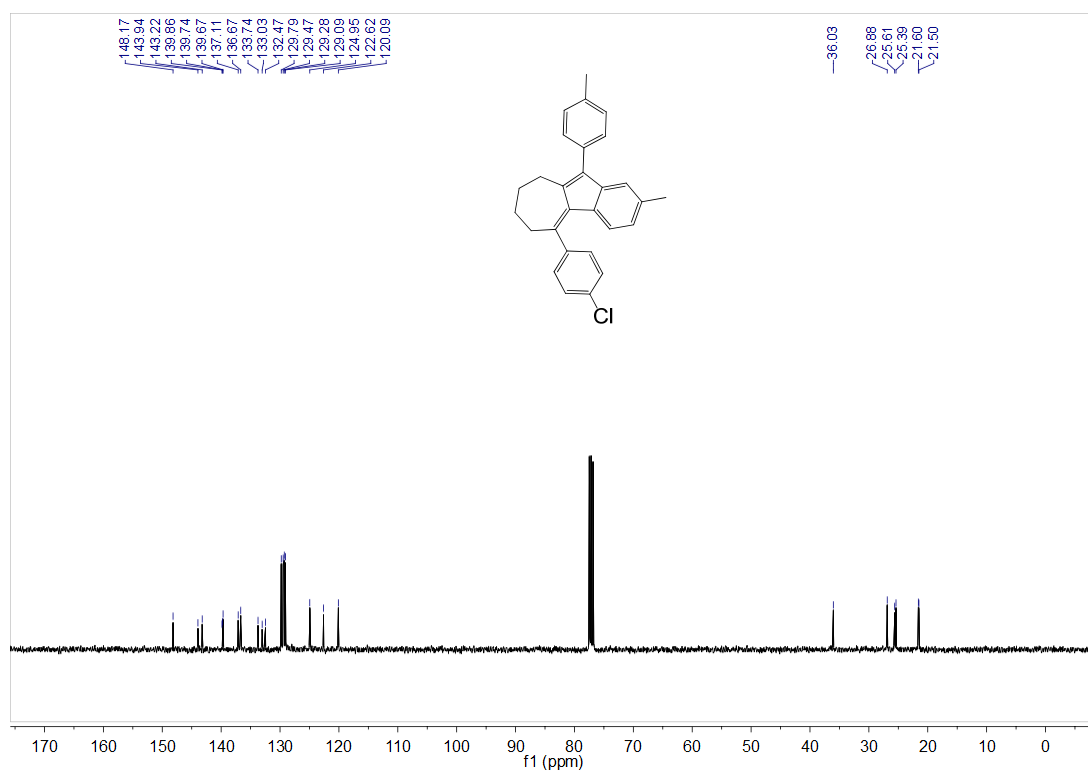

<sup>1</sup>H NMR (400 MHz, CDCl<sub>3</sub>) (up) and <sup>13</sup>C NMR (101 MHz, CDCl<sub>3</sub>) (down)

3ad

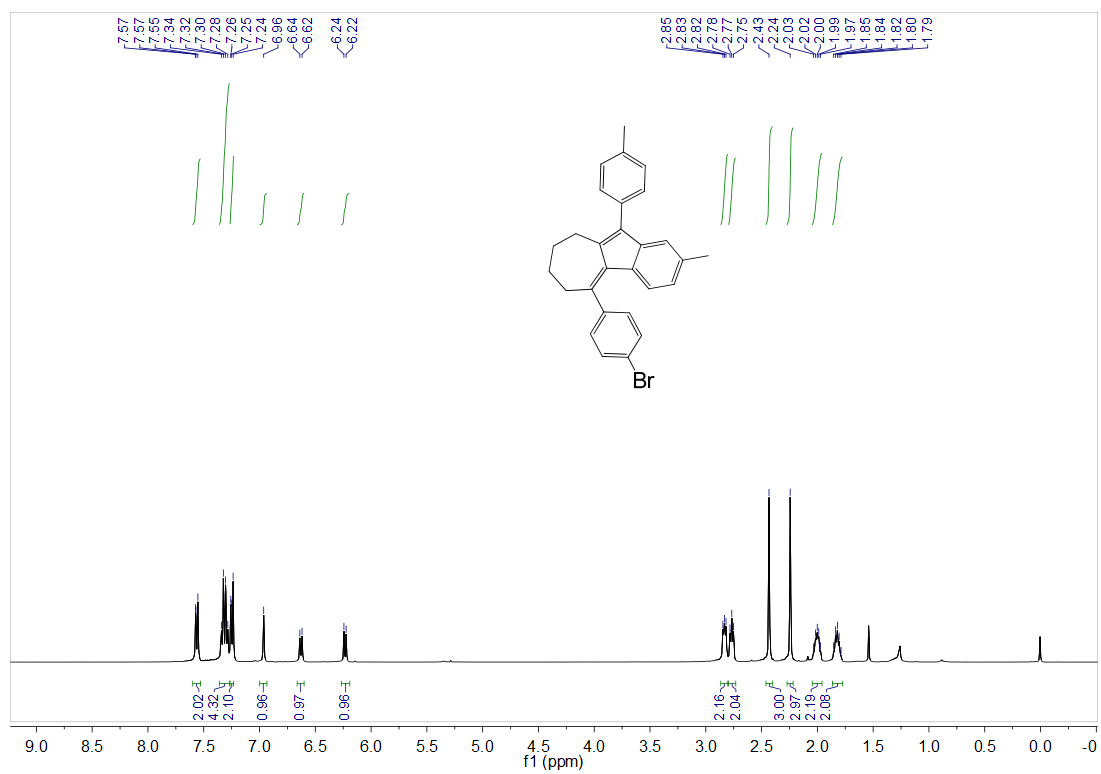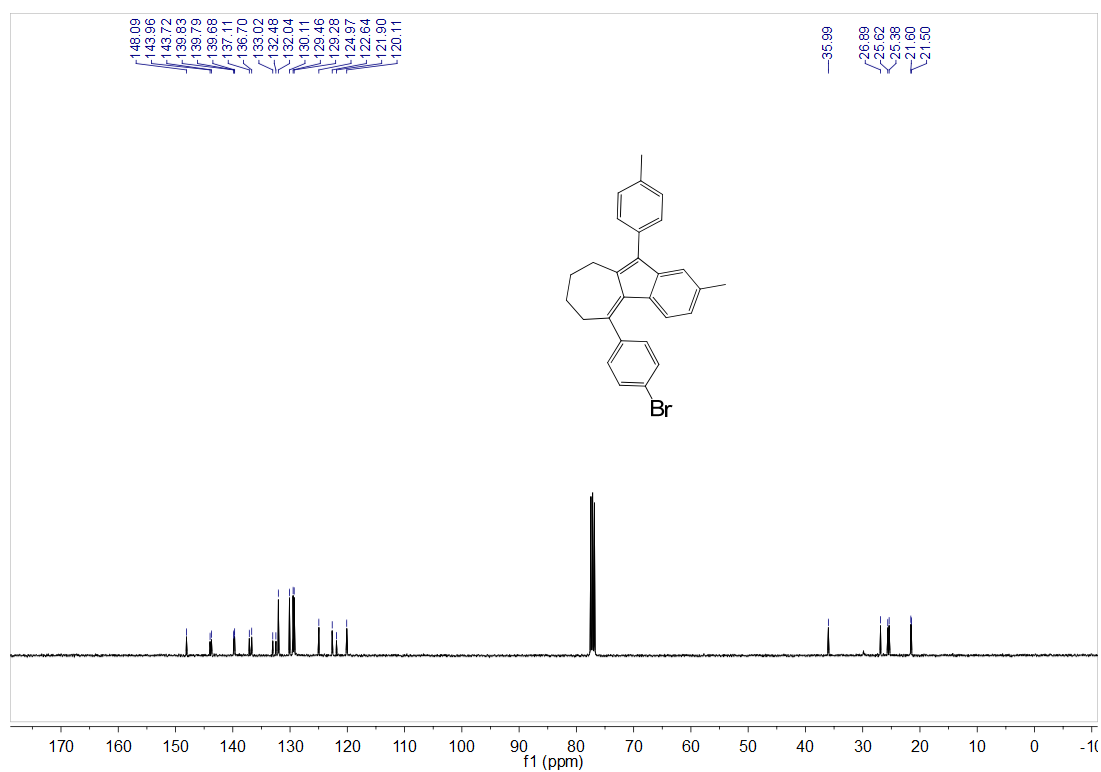

<sup>1</sup>H NMR (400 MHz, CDCl<sub>3</sub>) (up) and <sup>13</sup>C NMR (101 MHz, CDCl<sub>3</sub>) (down)

3ae

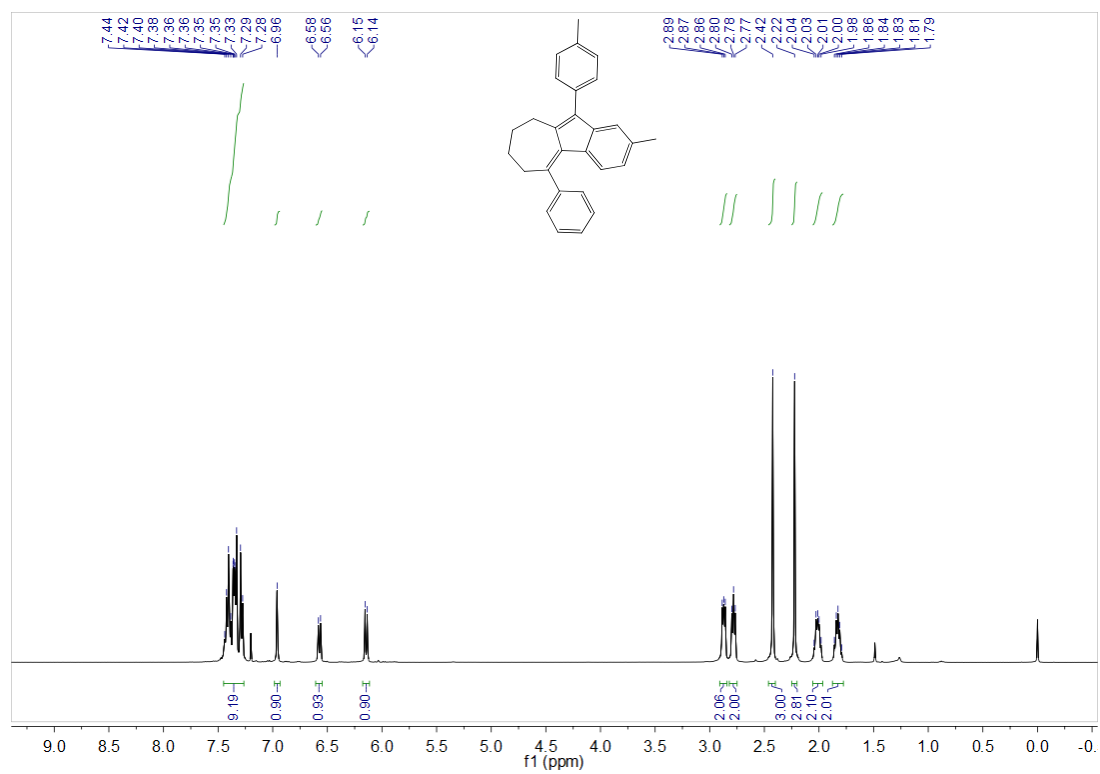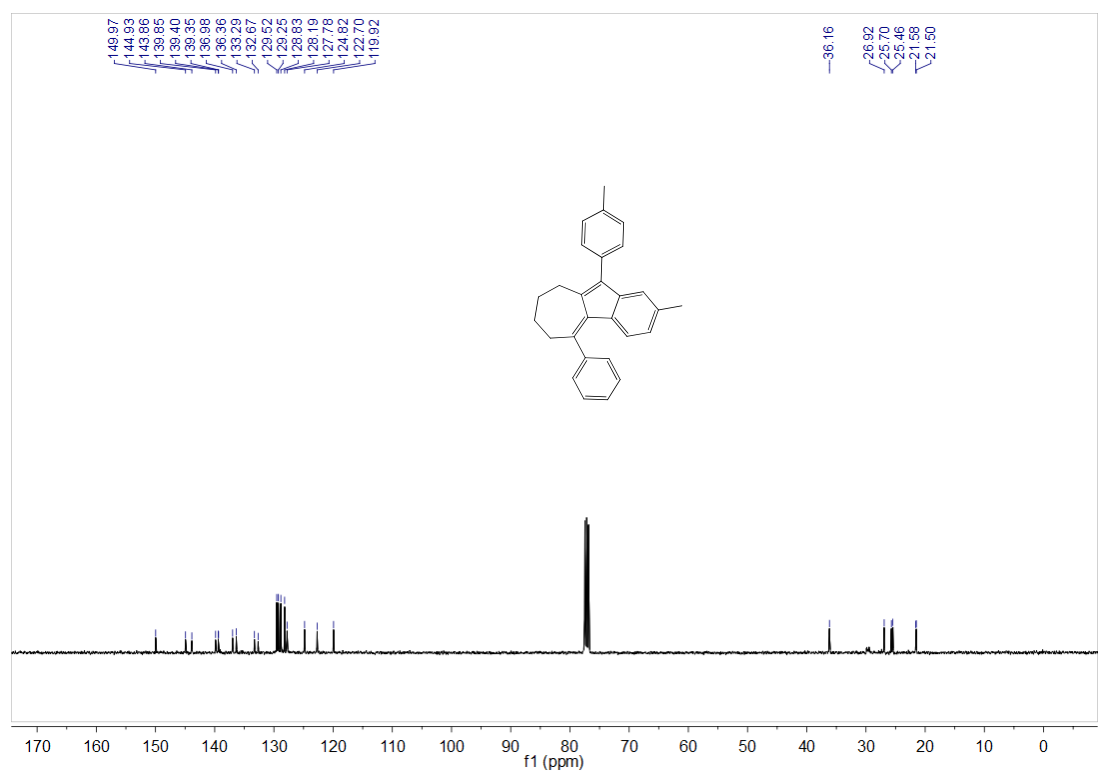

<sup>1</sup>H NMR (400 MHz, CDCl<sub>3</sub>) (up) and <sup>13</sup>C NMR (101 MHz, CDCl<sub>3</sub>) (down)

3af

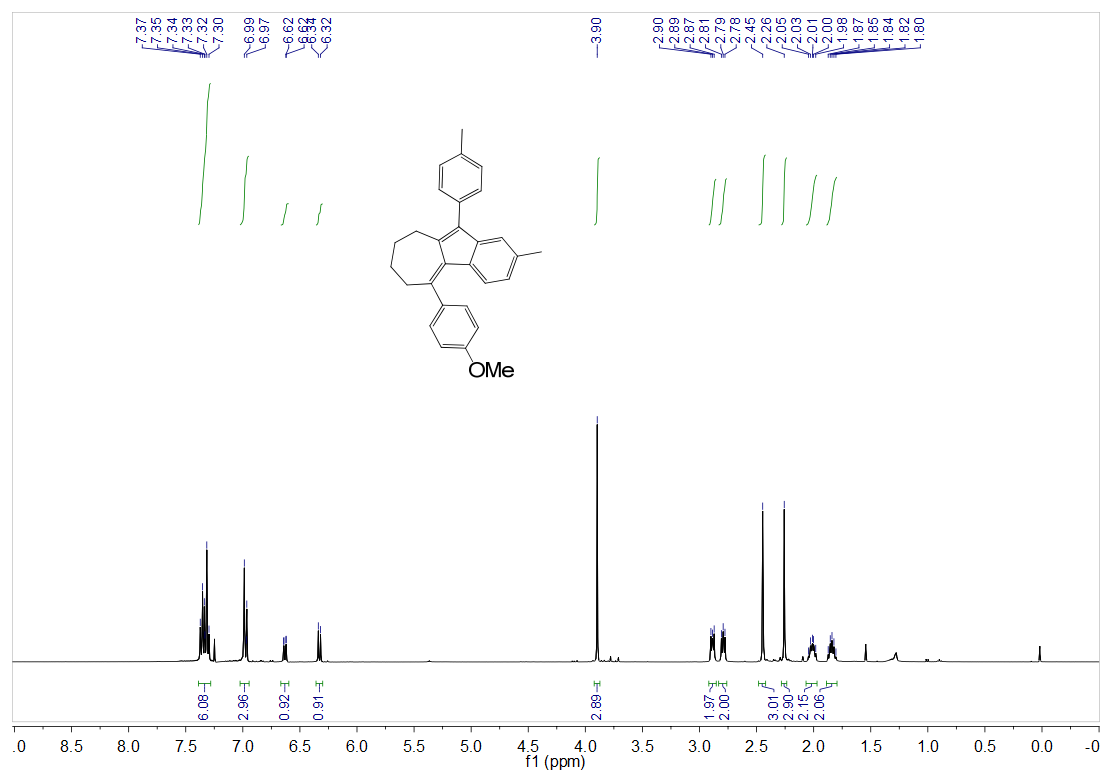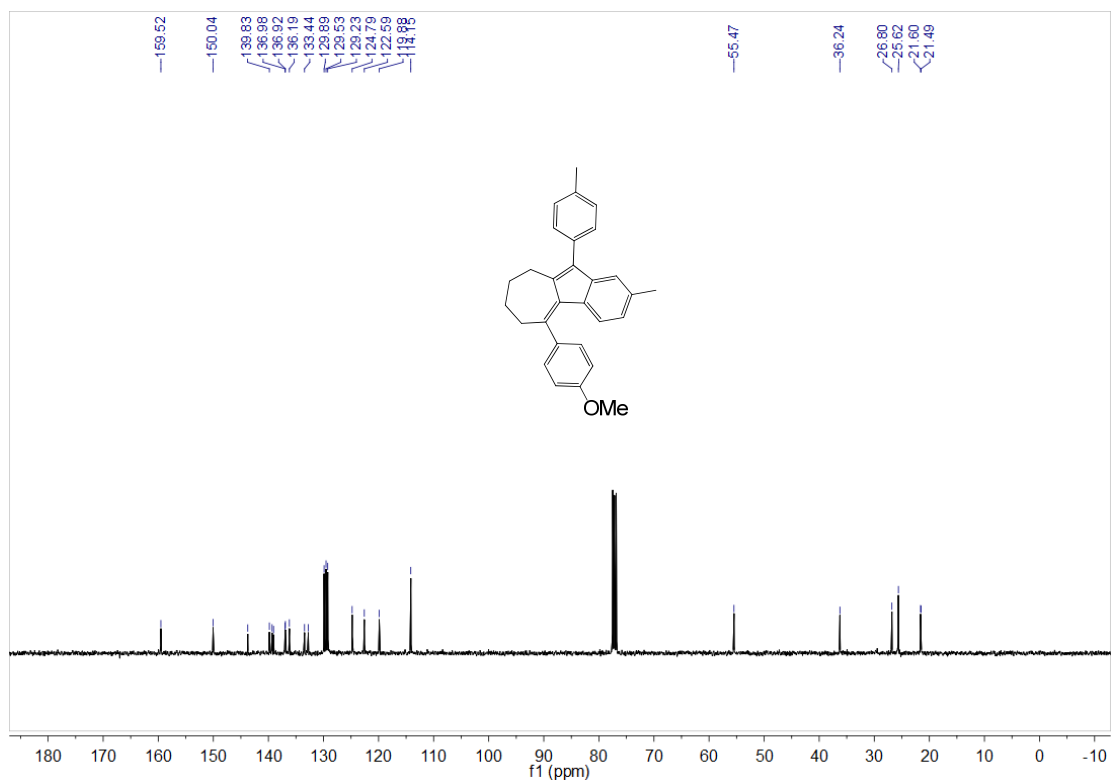

$^1\text{H}$  NMR (400 MHz,  $\text{CDCl}_3$ ) (up) and  $^{13}\text{C}$  NMR (101 MHz,  $\text{CDCl}_3$ ) (down)

3ag

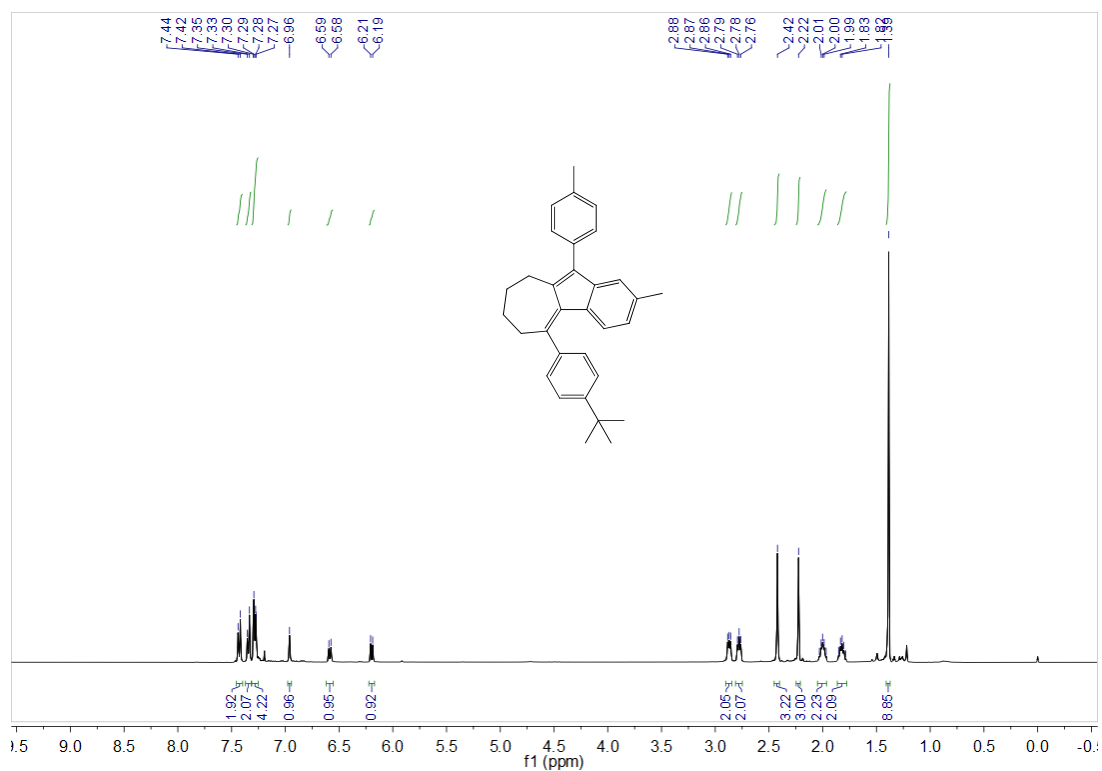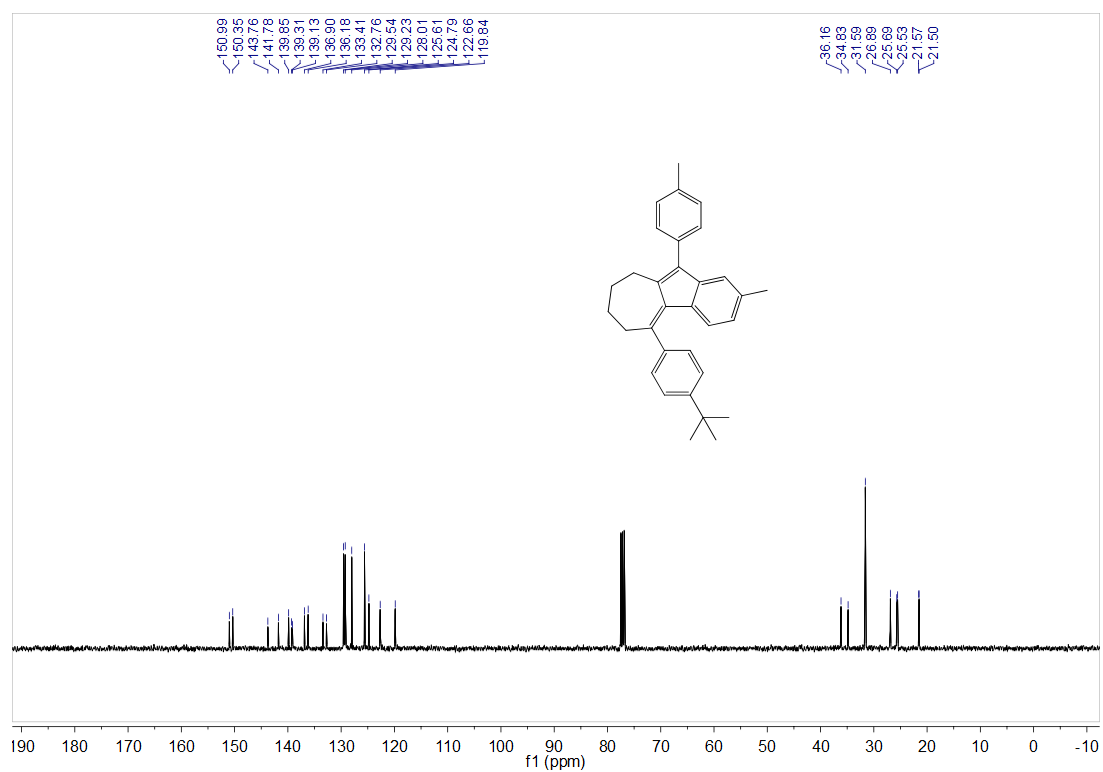

<sup>1</sup>H NMR (400 MHz, CDCl<sub>3</sub>) (up) and <sup>13</sup>C NMR (101 MHz, CDCl<sub>3</sub>) (down)

3ah

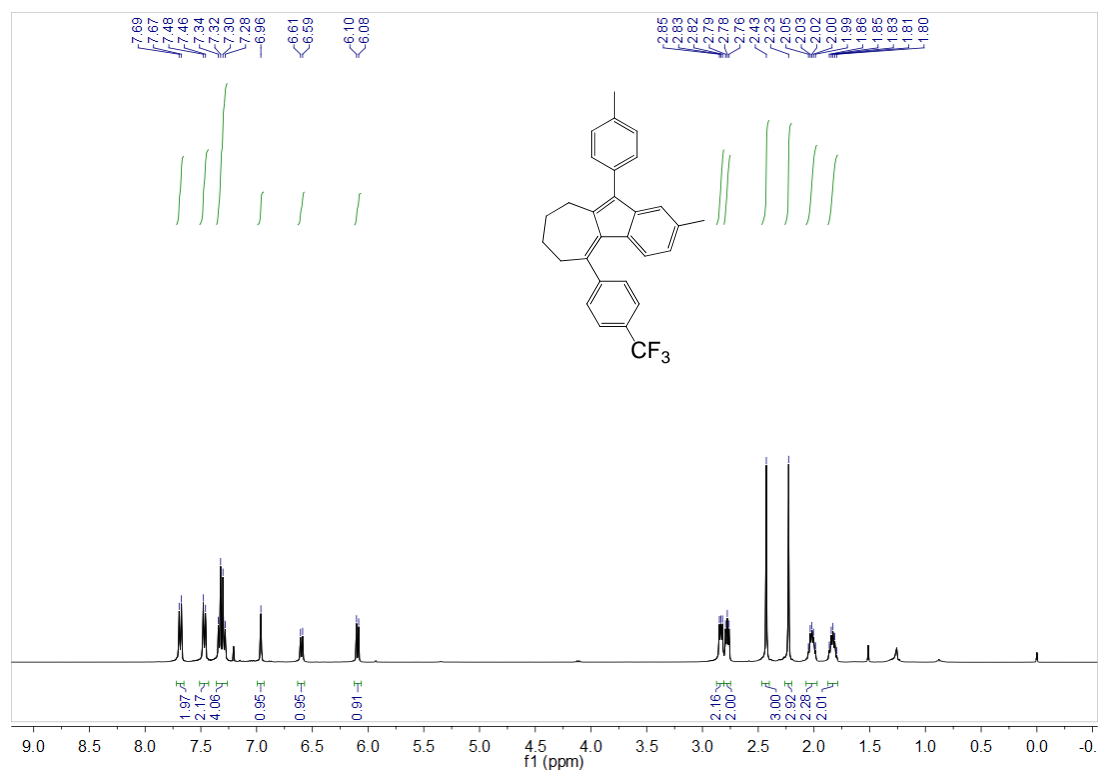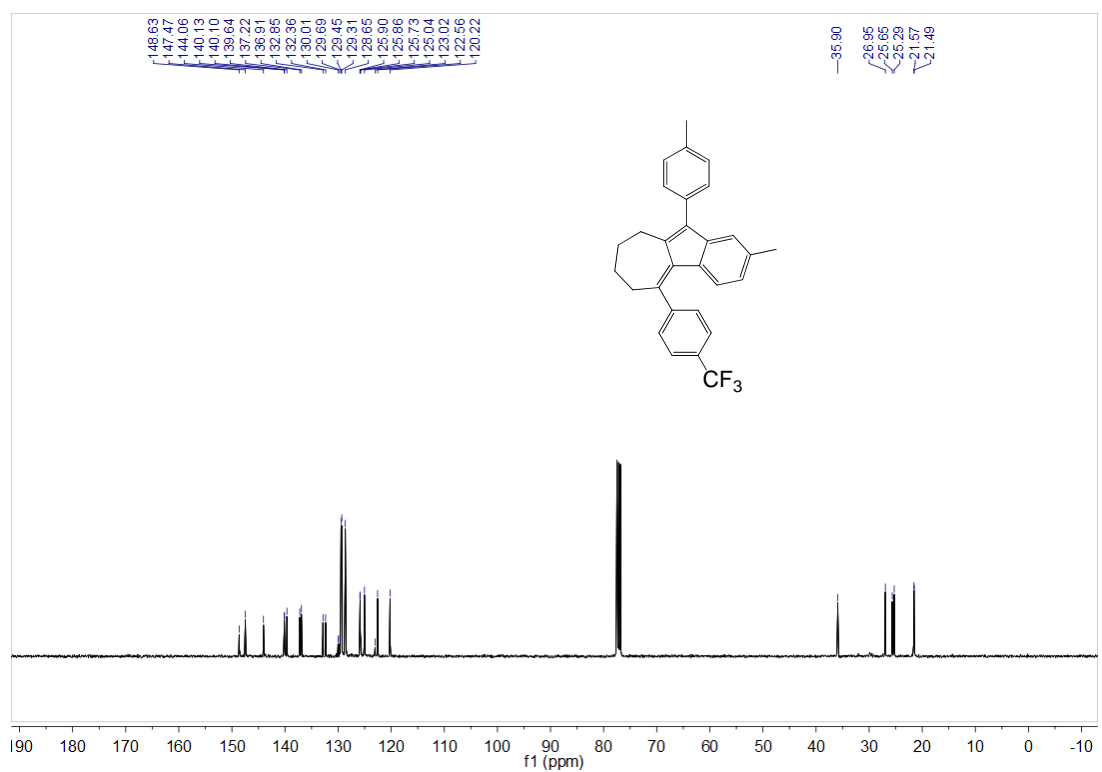

<sup>1</sup>H NMR (400 MHz, CDCl<sub>3</sub>) (up) and <sup>13</sup>C NMR (101 MHz, CDCl<sub>3</sub>) (down)

3ai

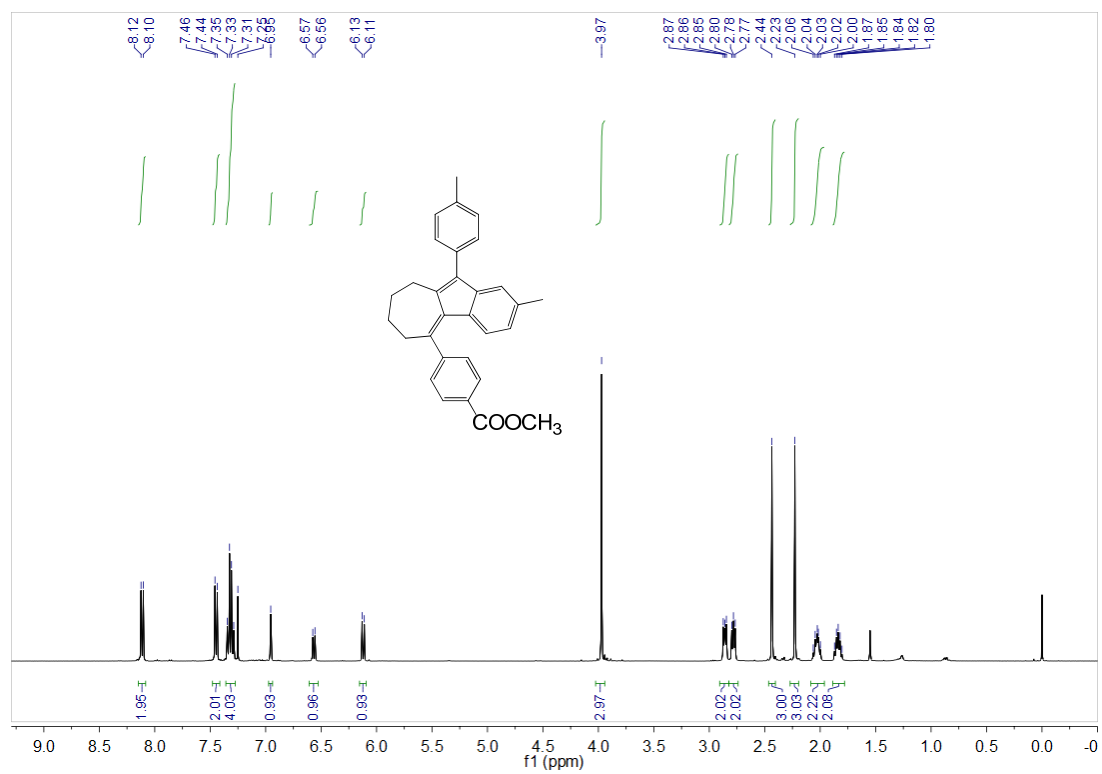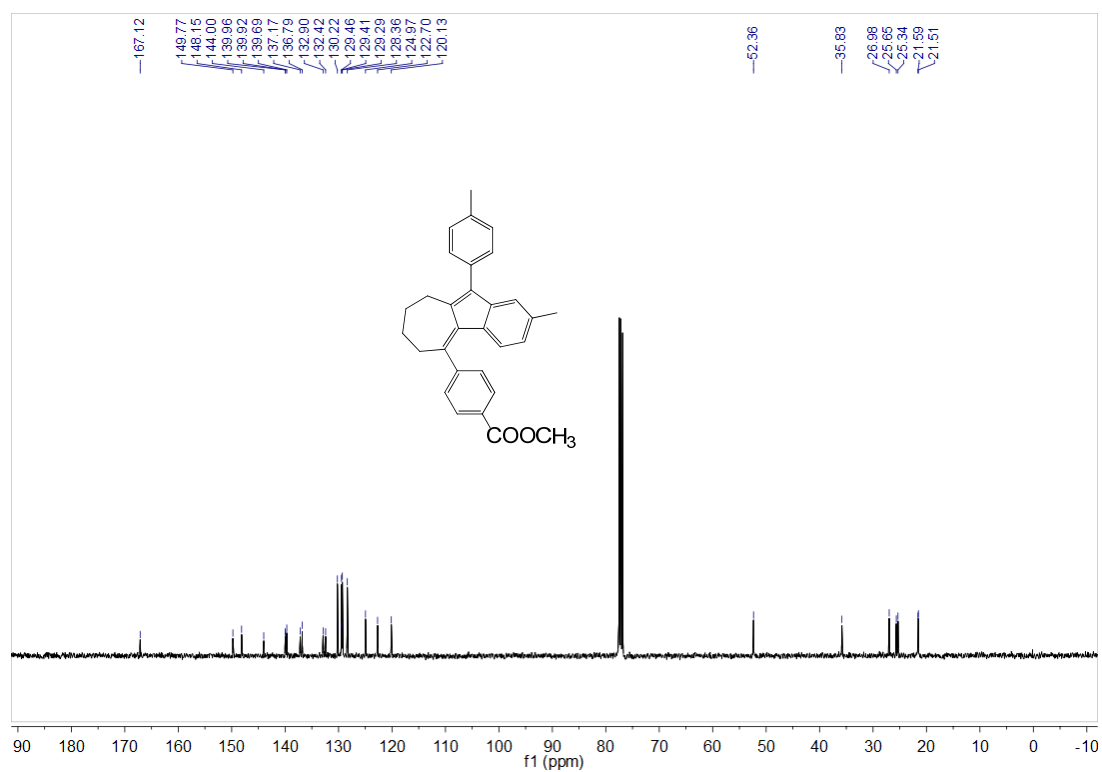

<sup>1</sup>H NMR (400 MHz, CDCl<sub>3</sub>) (up) and <sup>13</sup>C NMR (101 MHz, CDCl<sub>3</sub>) (down)

3aj

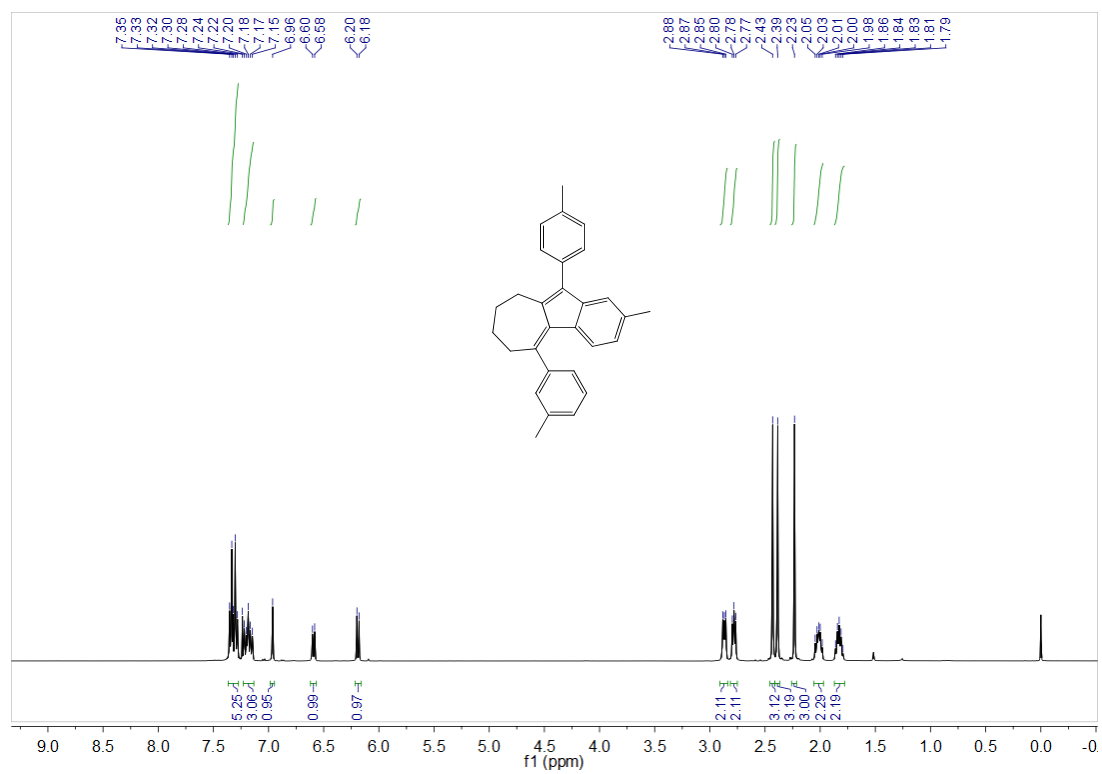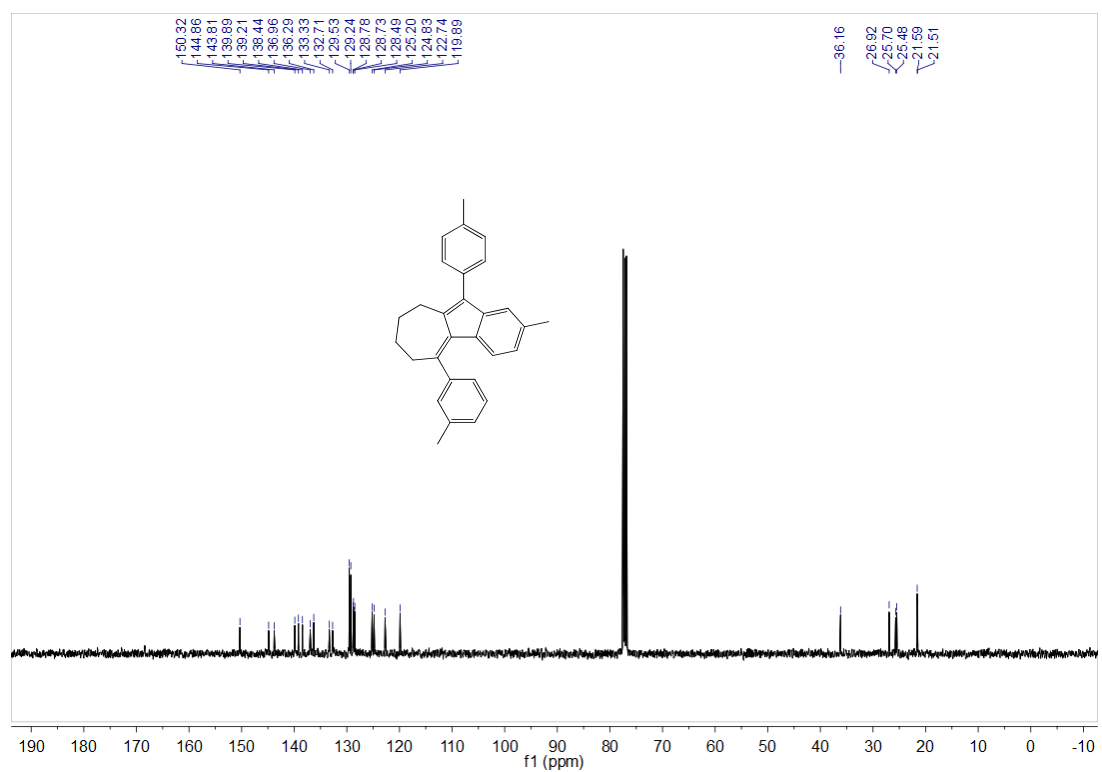

<sup>1</sup>H NMR (400 MHz, CDCl<sub>3</sub>) (up) and <sup>13</sup>C NMR (101 MHz, CDCl<sub>3</sub>) (down)



3ak

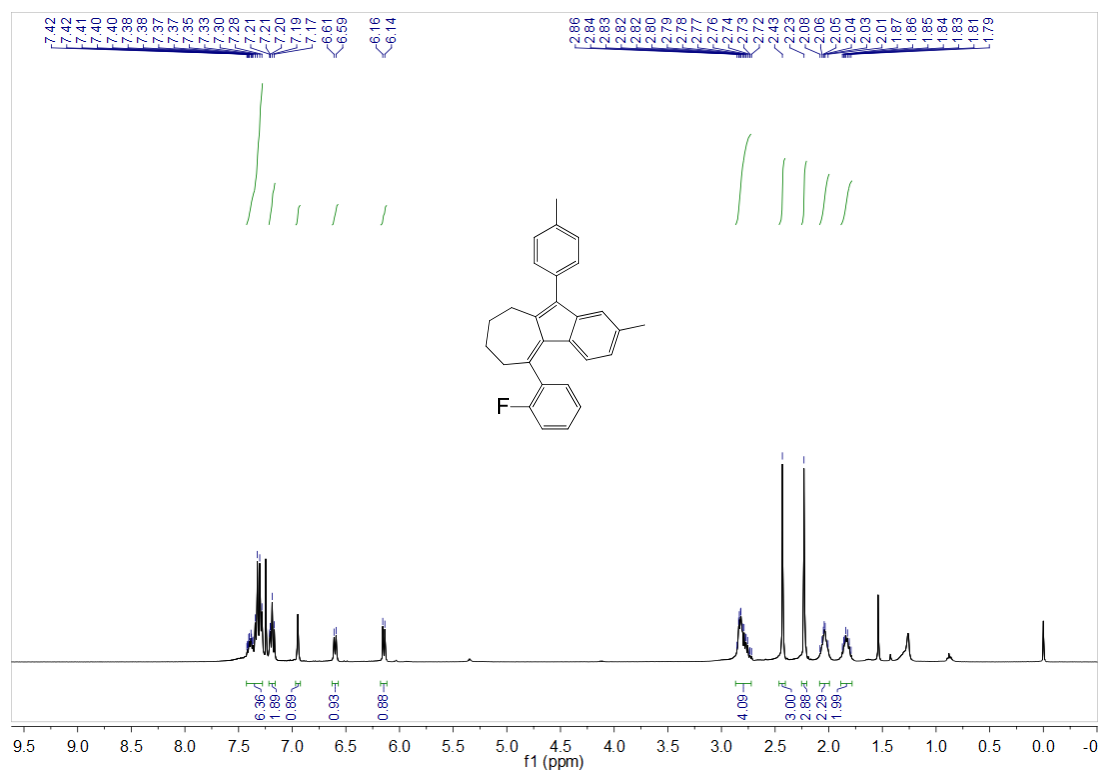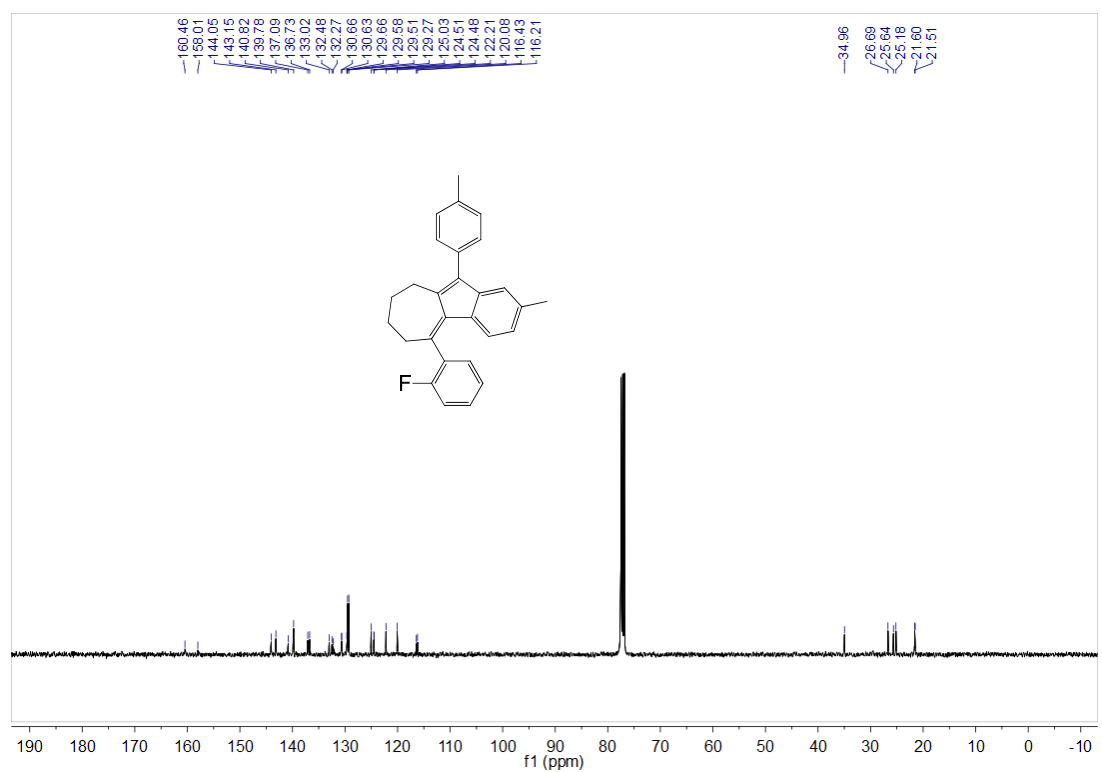

<sup>1</sup>H NMR (400 MHz, CDCl<sub>3</sub>) (up) and <sup>13</sup>C NMR (101 MHz, CDCl<sub>3</sub>) (down)

**3ba**

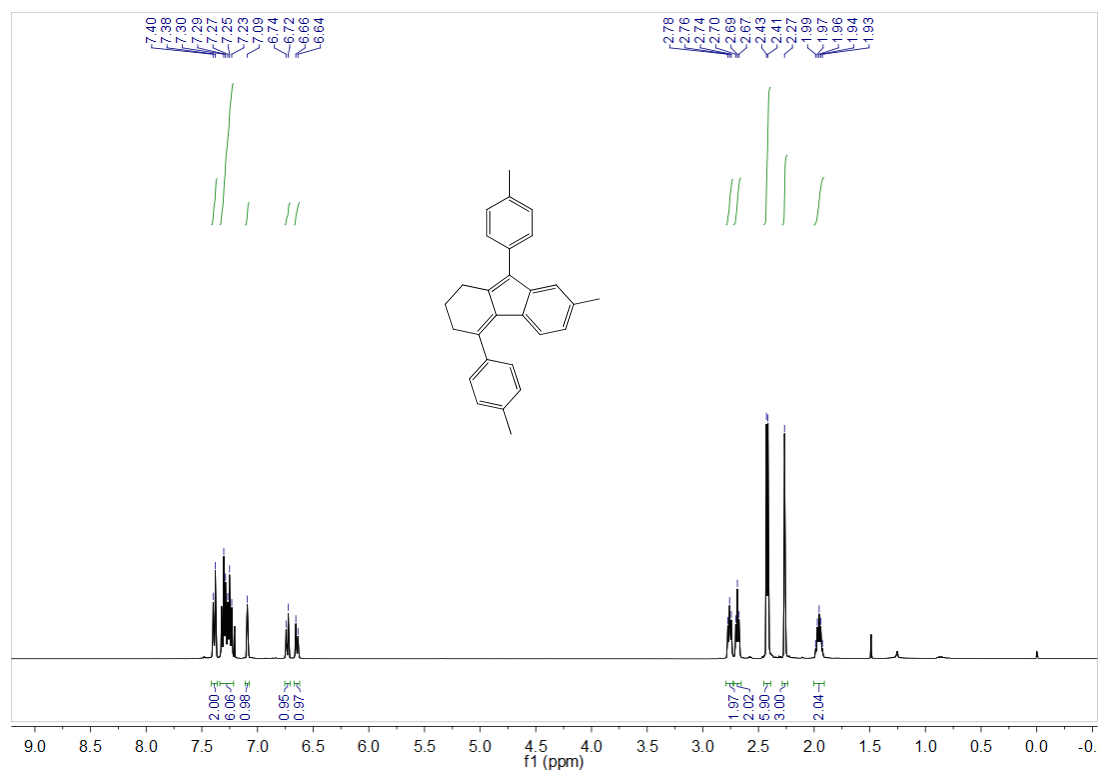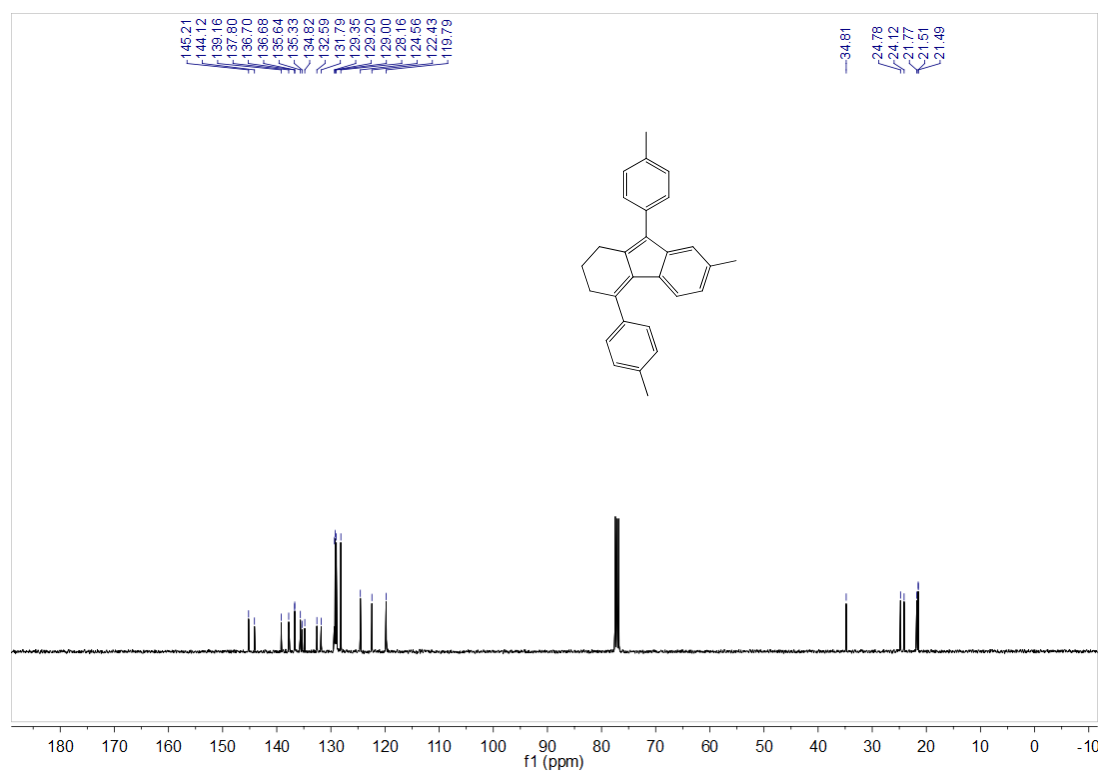

<sup>1</sup>H NMR (400 MHz, CDCl<sub>3</sub>) (up) and <sup>13</sup>C NMR (101 MHz, CDCl<sub>3</sub>) (down)

**3ca**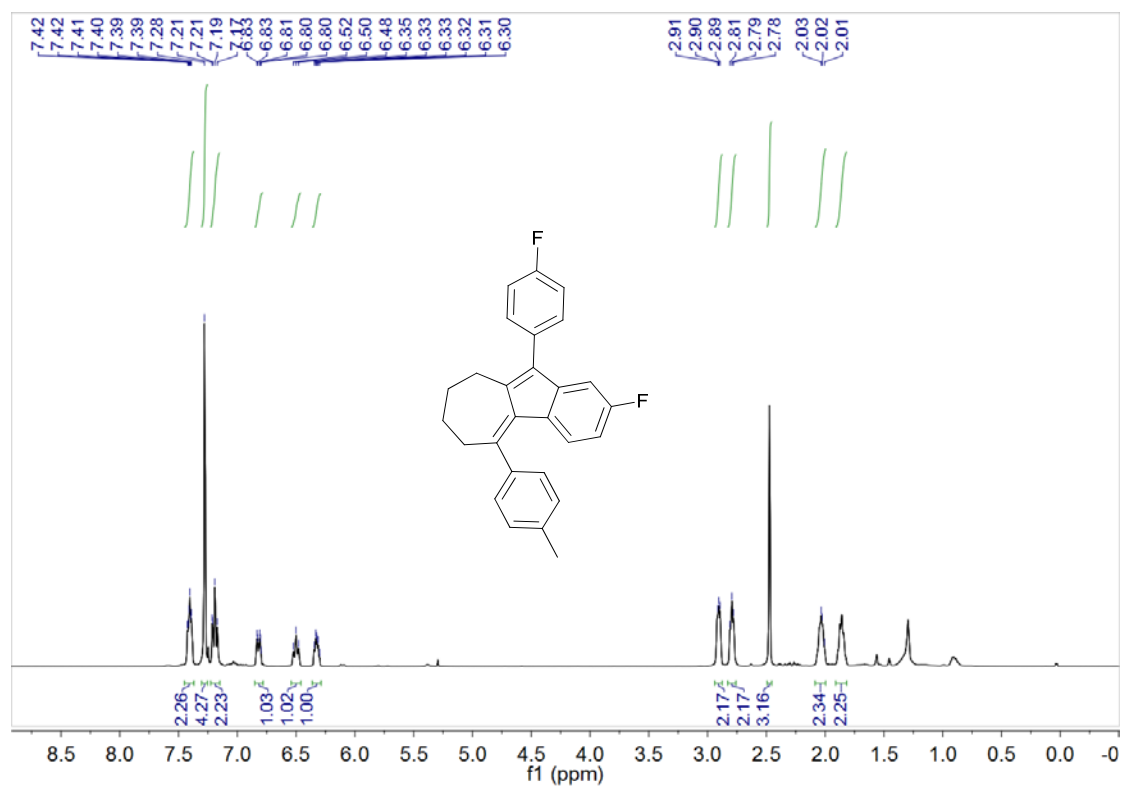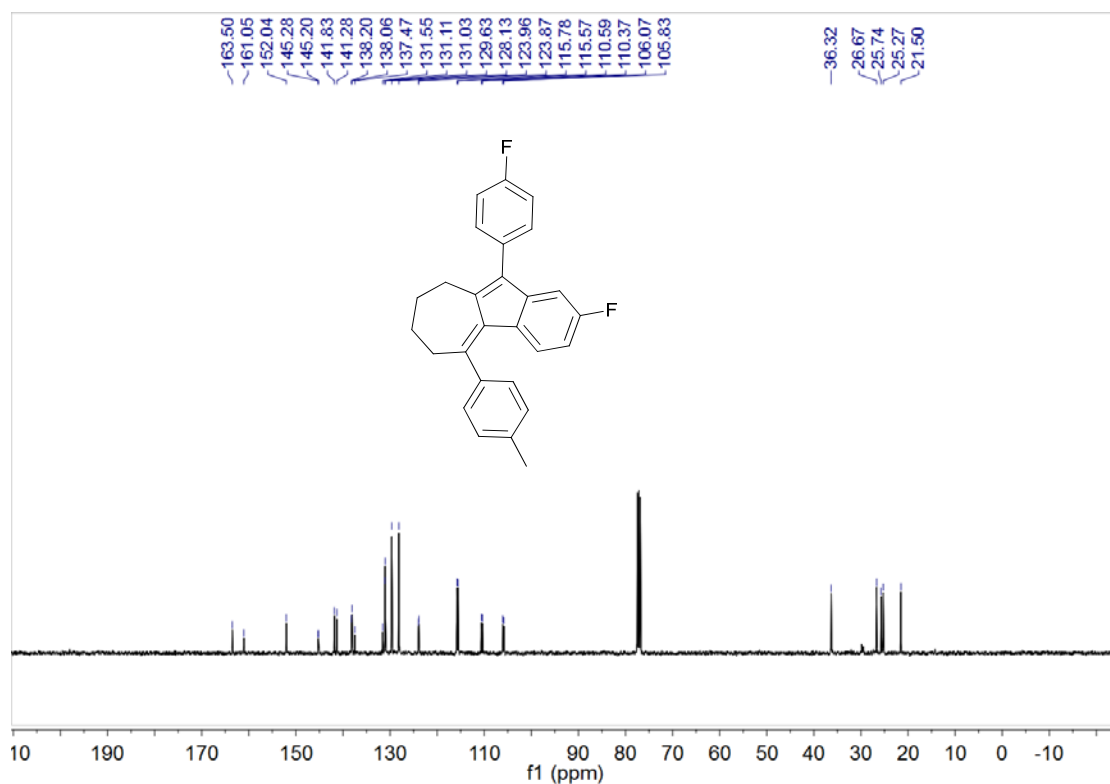

<sup>1</sup>H NMR (400 MHz, CDCl<sub>3</sub>) (up) and <sup>13</sup>C NMR (101 MHz, CDCl<sub>3</sub>) (down)

3da

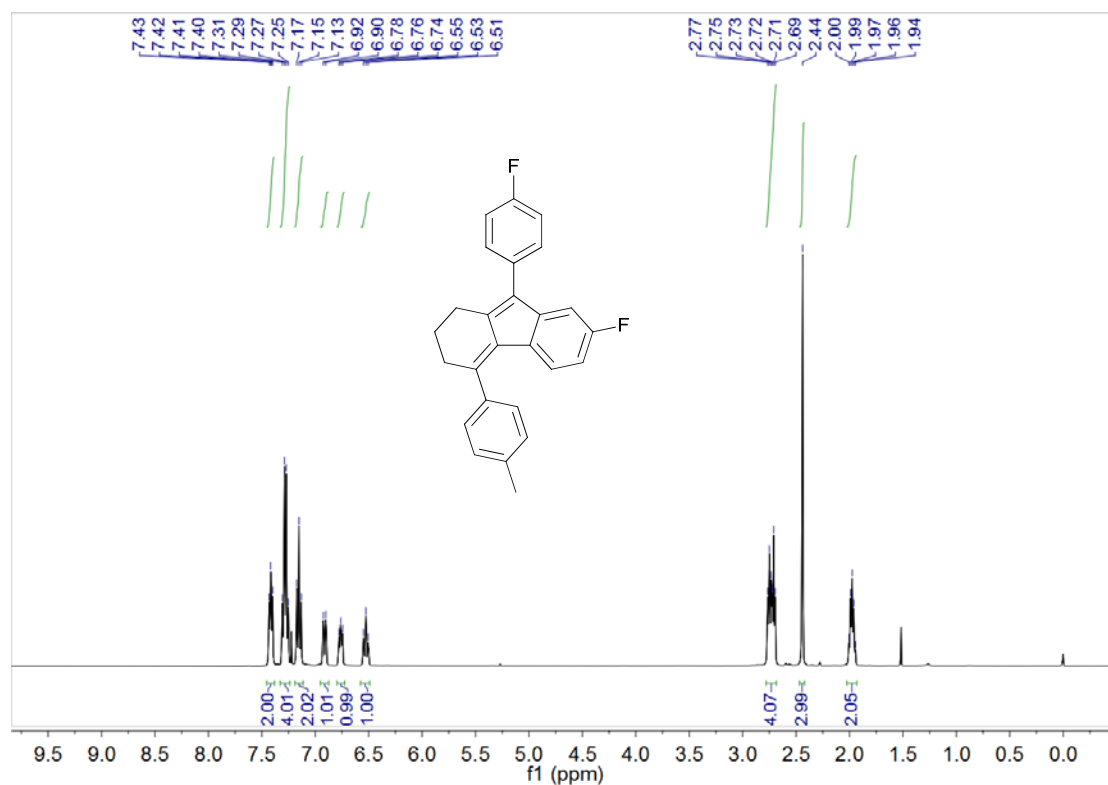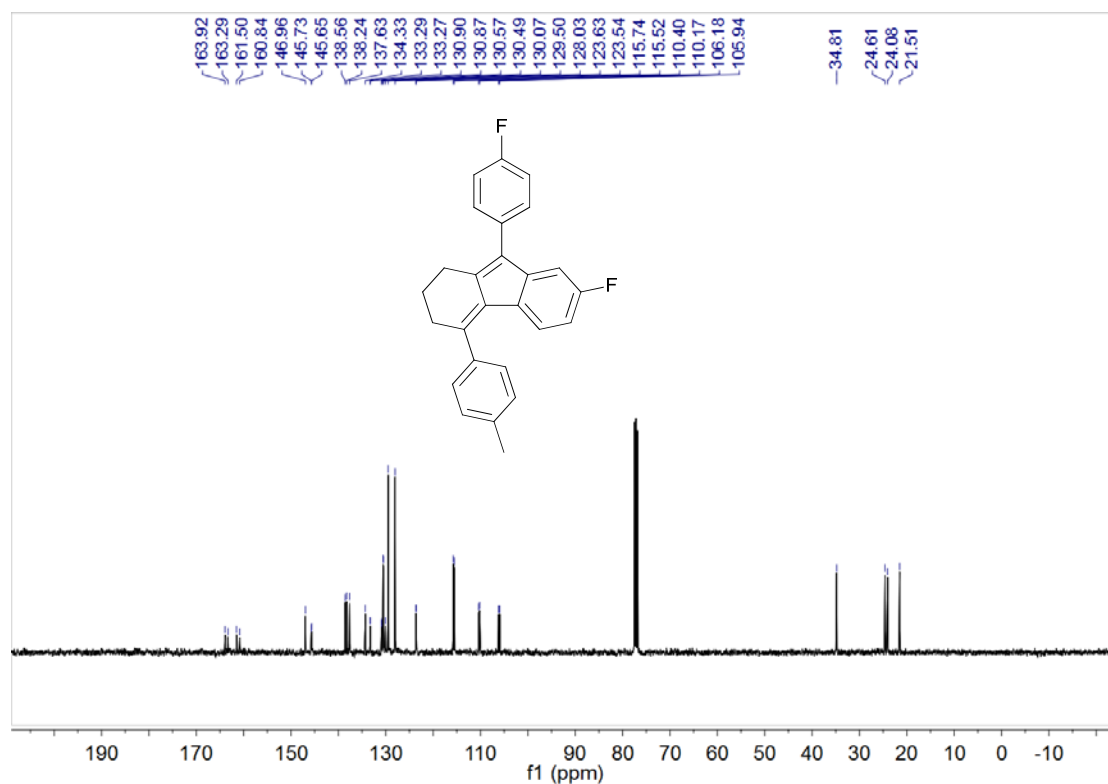

$^1\text{H}$  NMR (400 MHz,  $\text{CDCl}_3$ ) (up) and  $^{13}\text{C}$  NMR (101 MHz,  $\text{CDCl}_3$ ) (down)

3ea

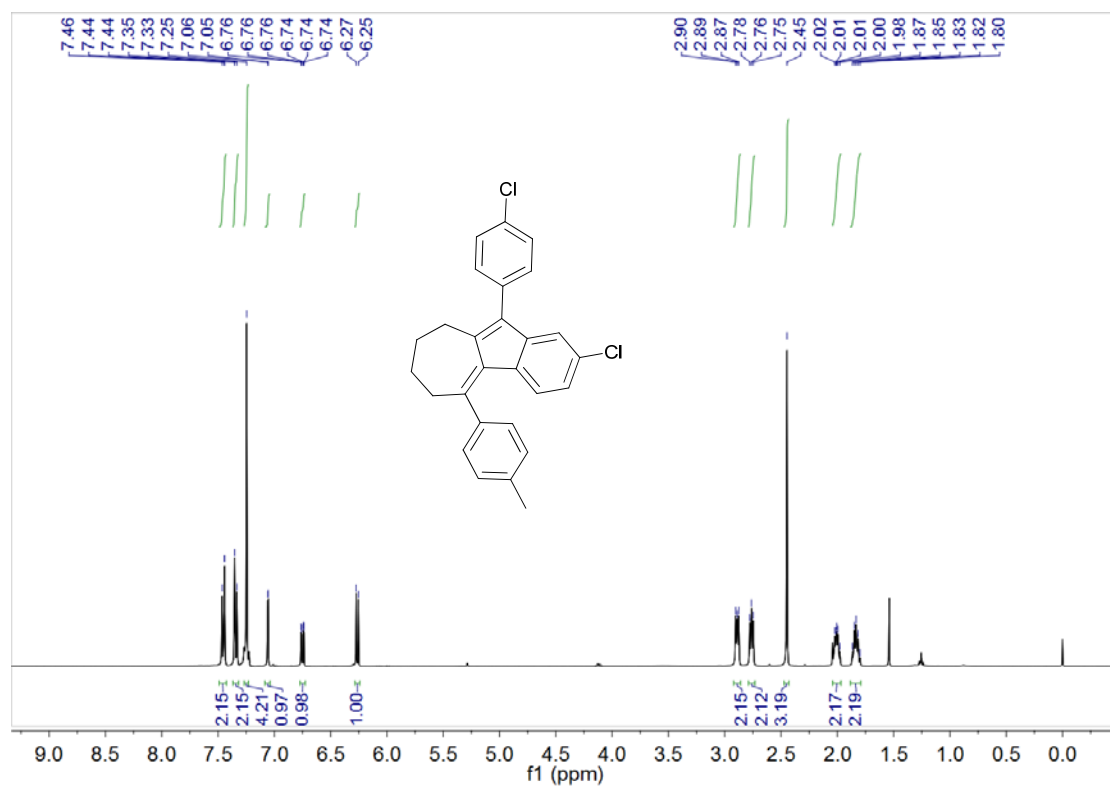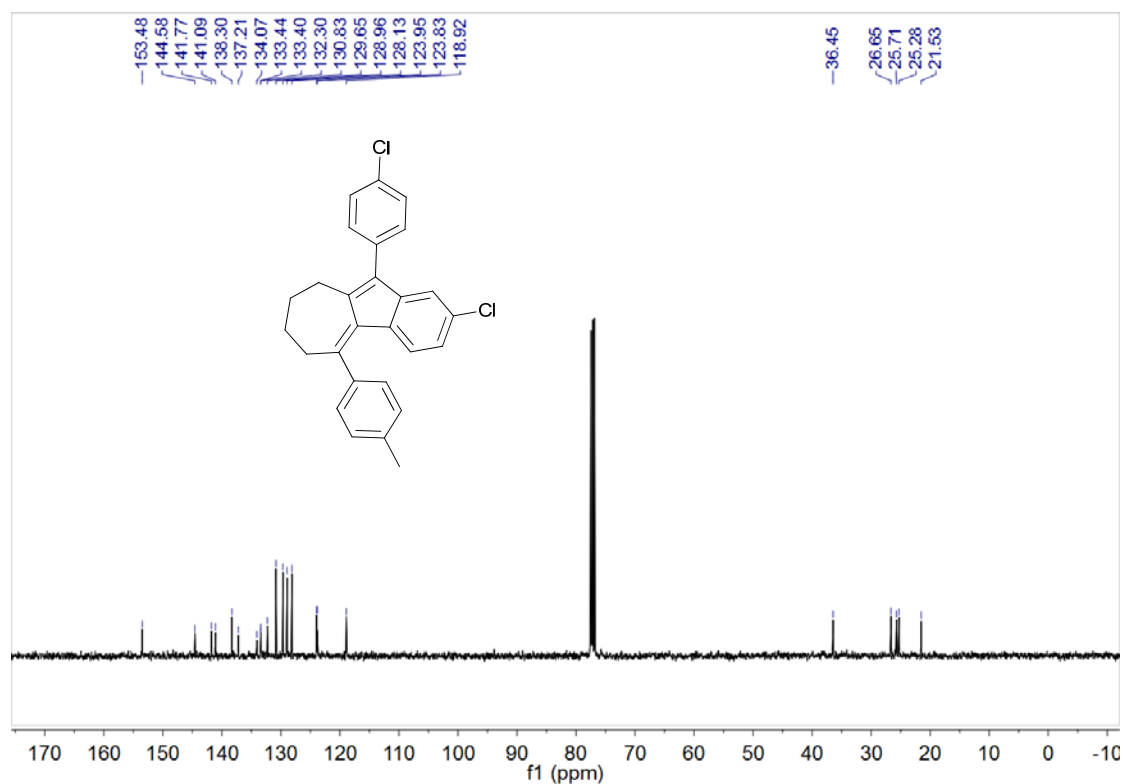

<sup>1</sup>H NMR (400 MHz, CDCl<sub>3</sub>) (up) and <sup>13</sup>C NMR (101 MHz, CDCl<sub>3</sub>) (down)

3fa

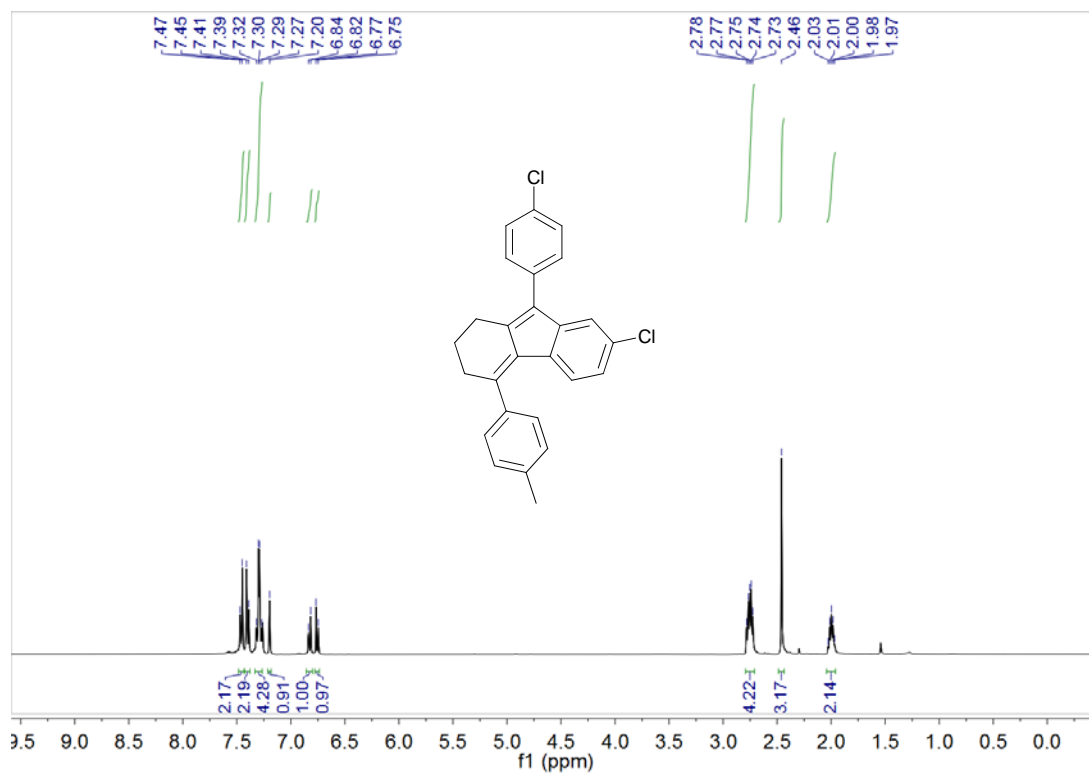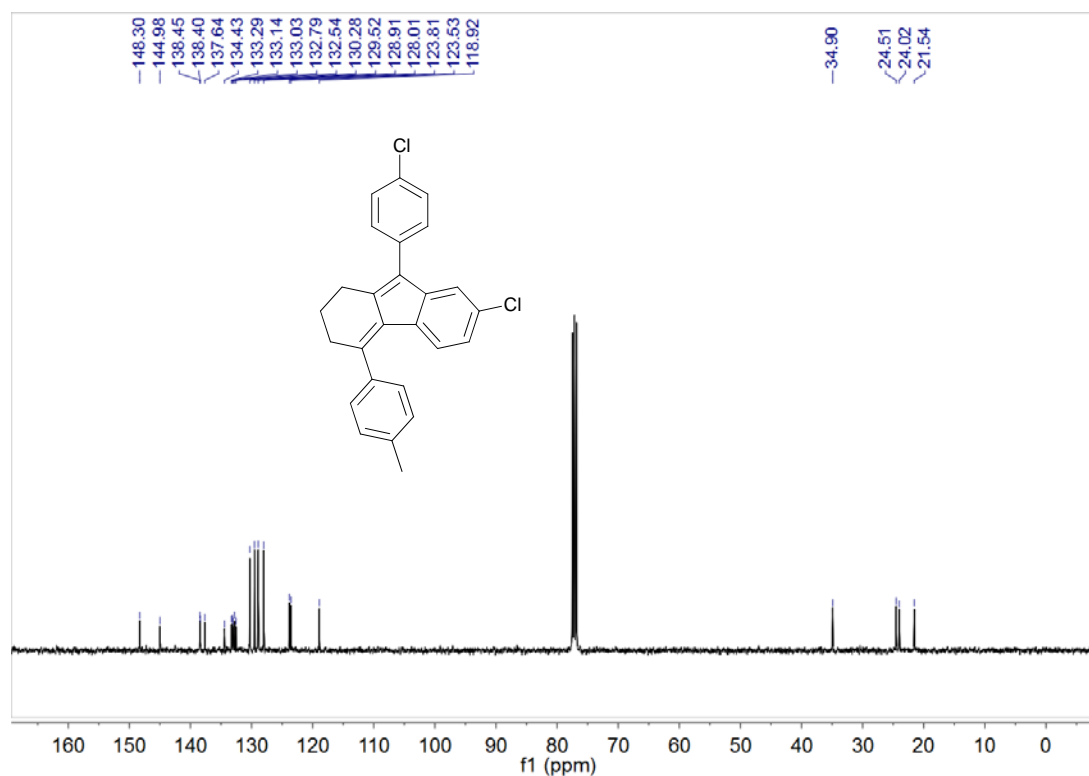

<sup>1</sup>H NMR (400 MHz, CDCl<sub>3</sub>) (up) and <sup>13</sup>C NMR (101 MHz, CDCl<sub>3</sub>) (down)

3ga

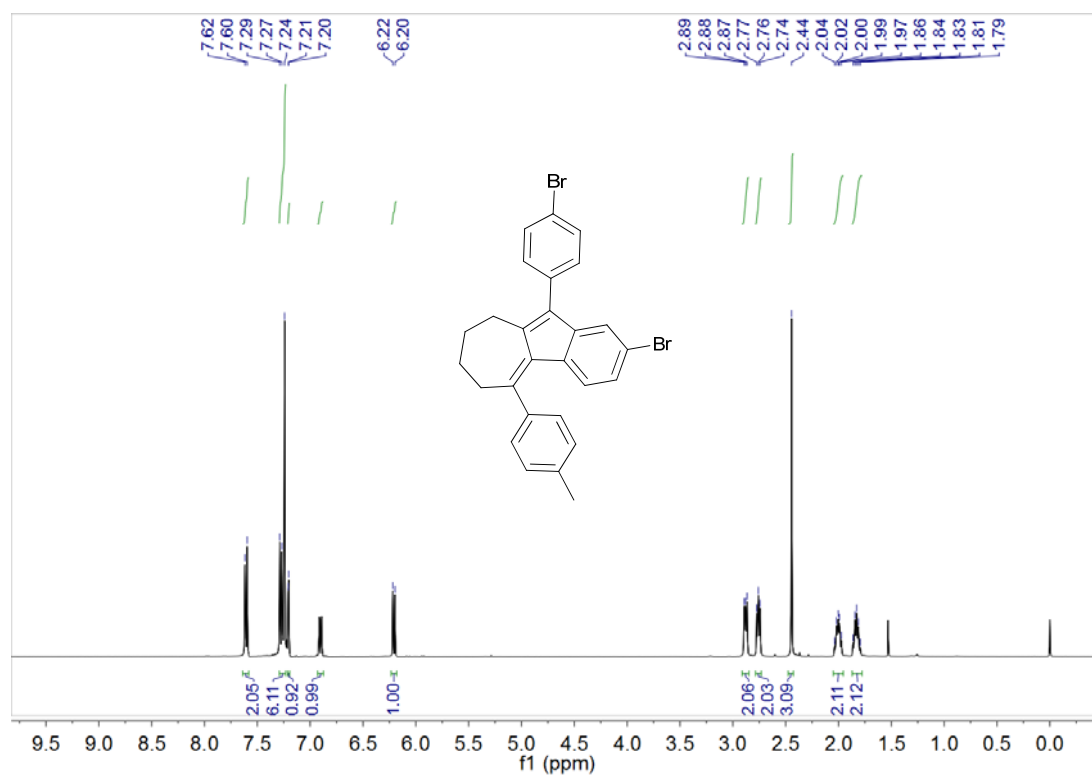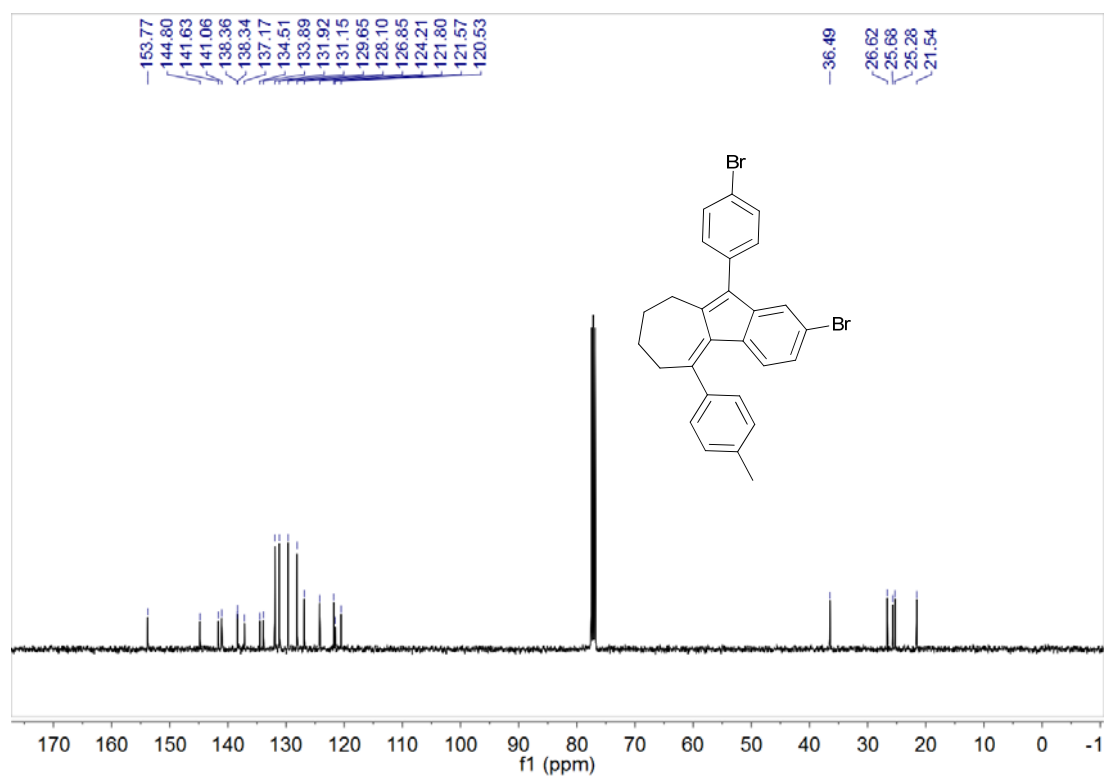

<sup>1</sup>H NMR (400 MHz, CDCl<sub>3</sub>) (up) and <sup>13</sup>C NMR (101 MHz, CDCl<sub>3</sub>) (down)

3ha

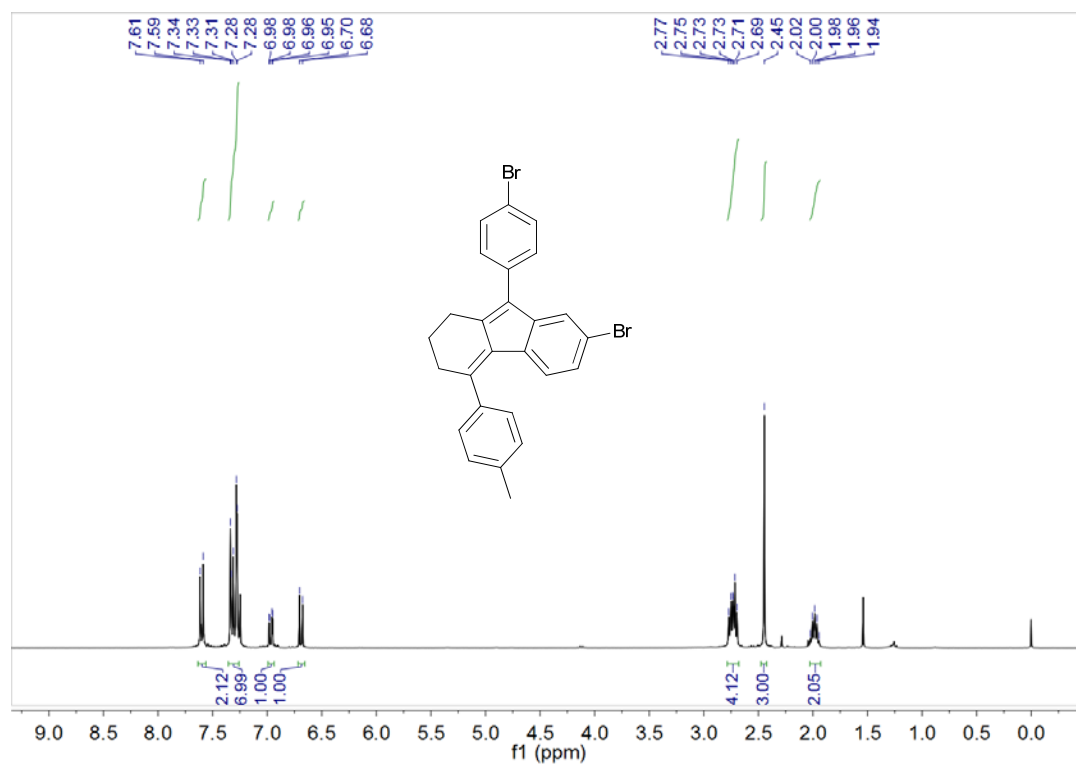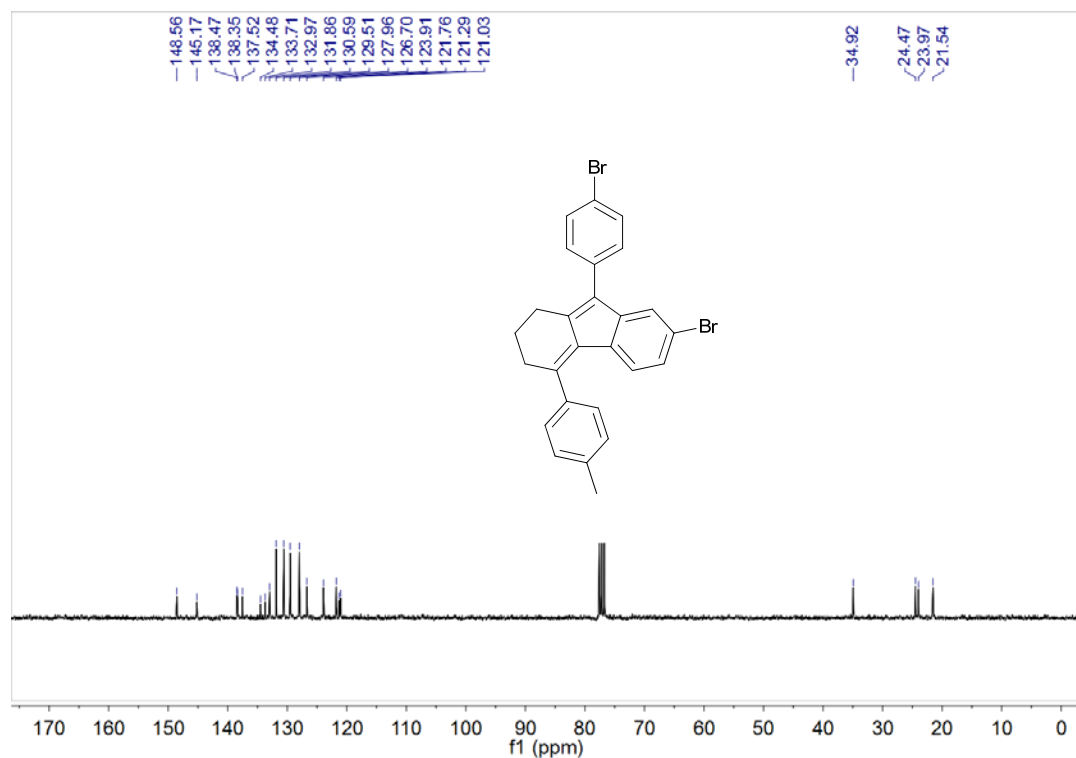

$^1\text{H}$  NMR (300 MHz,  $\text{CDCl}_3$ ) (up) and  $^{13}\text{C}$  NMR (76 MHz,  $\text{CDCl}_3$ ) (down)



3ia

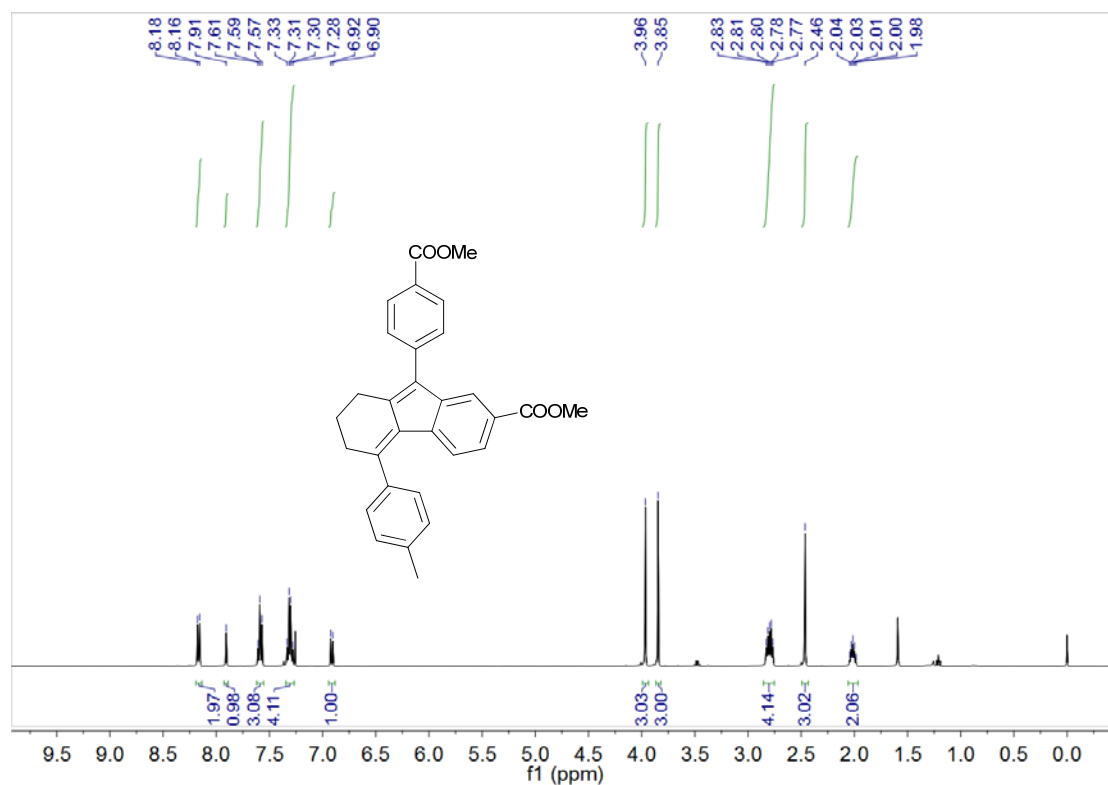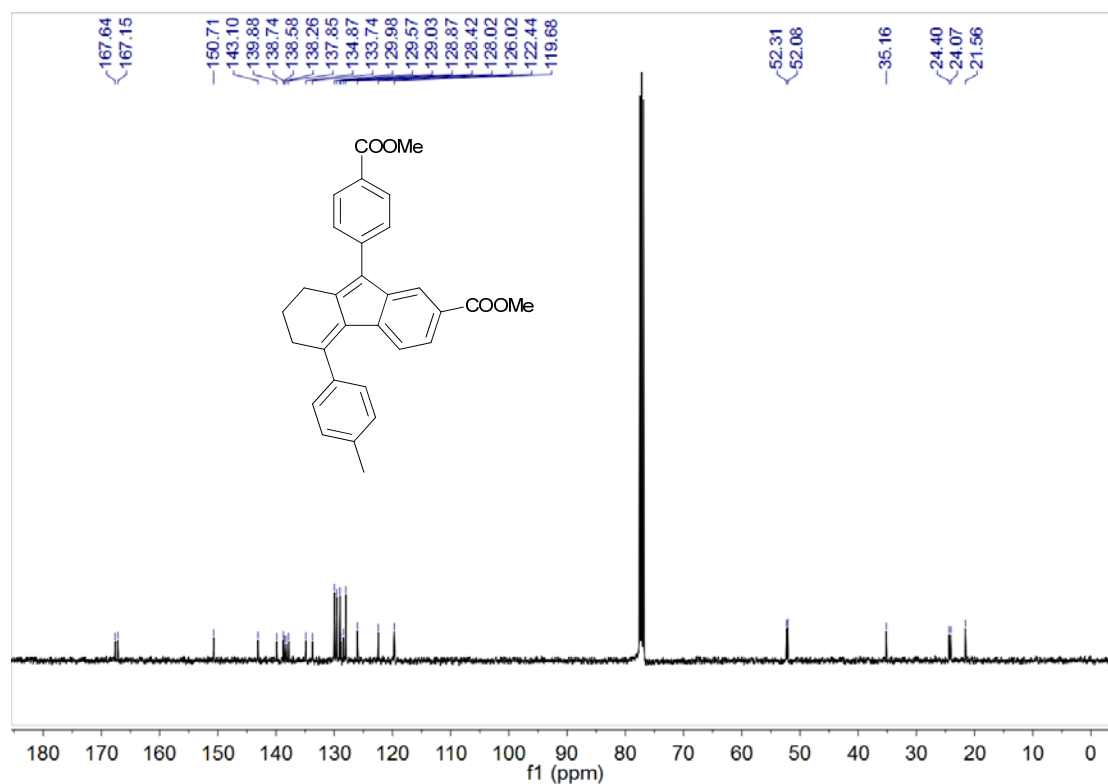

<sup>1</sup>H NMR (400 MHz, CDCl<sub>3</sub>) (up) and <sup>13</sup>C NMR (101 MHz, CDCl<sub>3</sub>) (down)

### 3ja

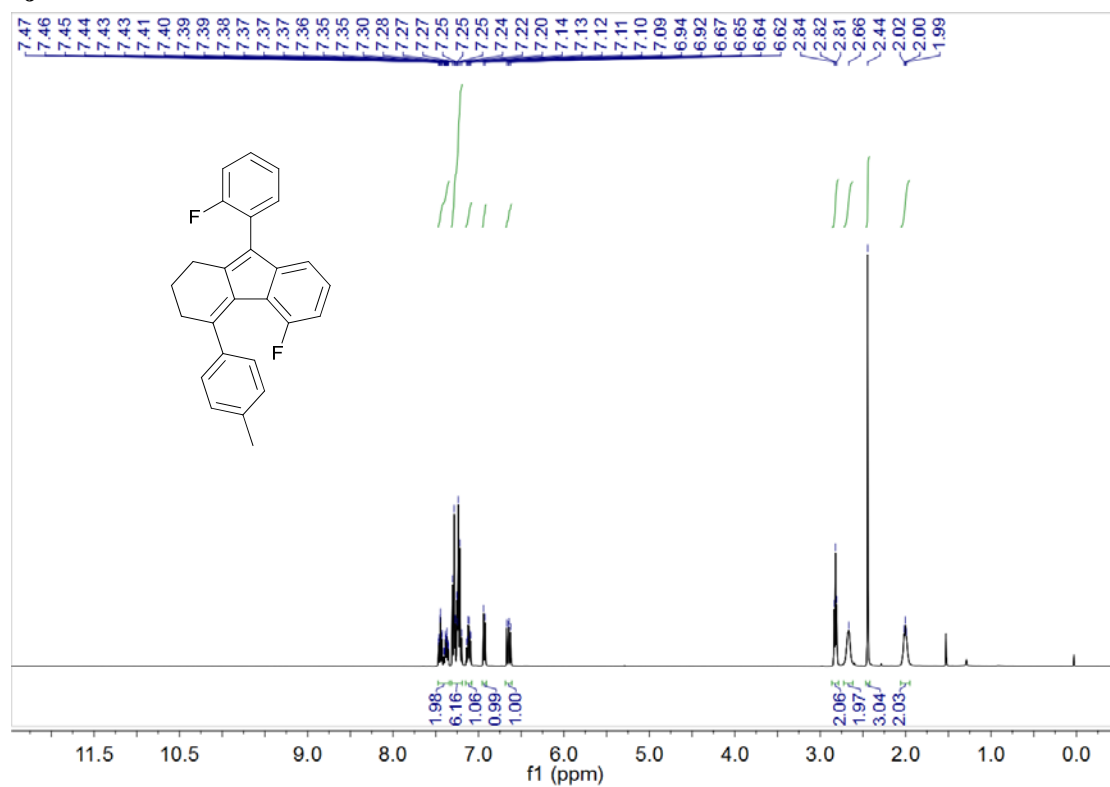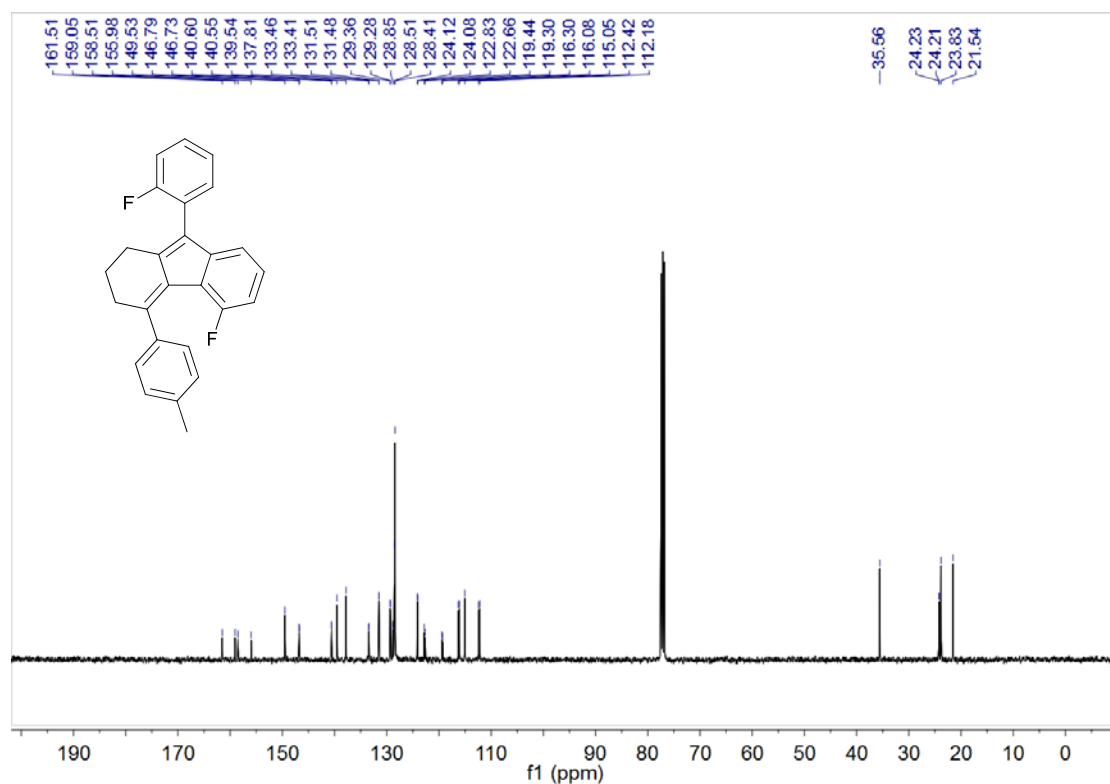

<sup>1</sup>H NMR (400 MHz, CDCl<sub>3</sub>) (up) and <sup>13</sup>C NMR (101 MHz, CDCl<sub>3</sub>) (down)

3la

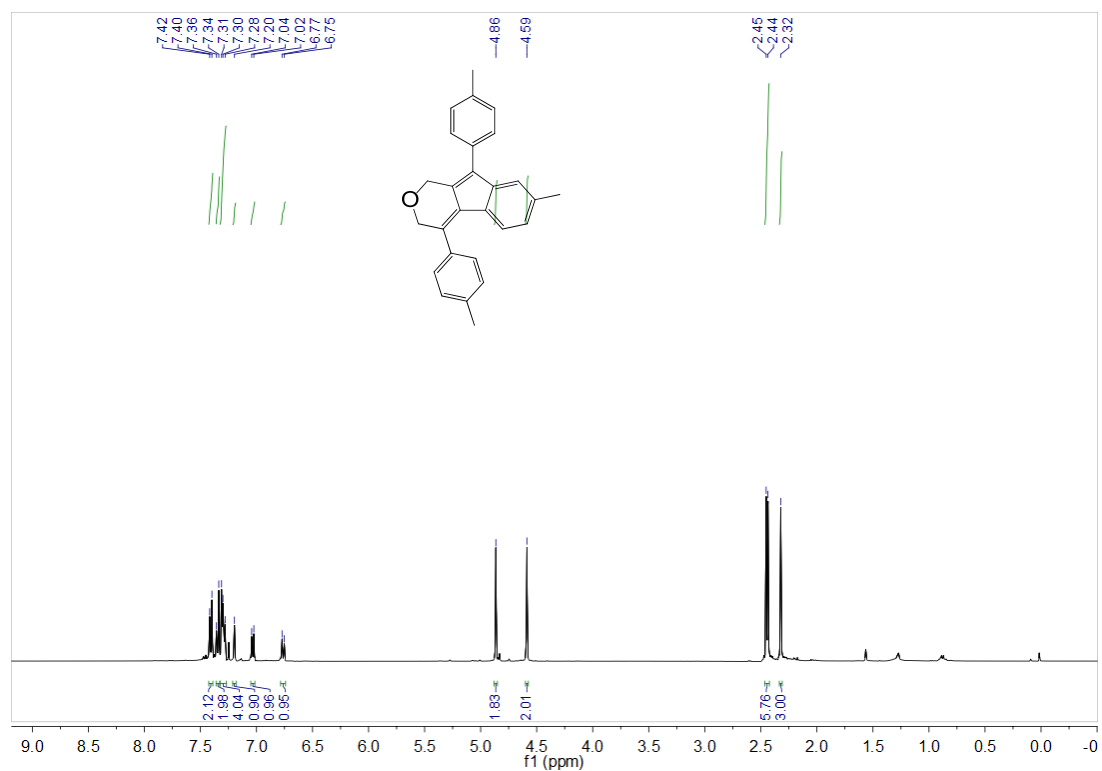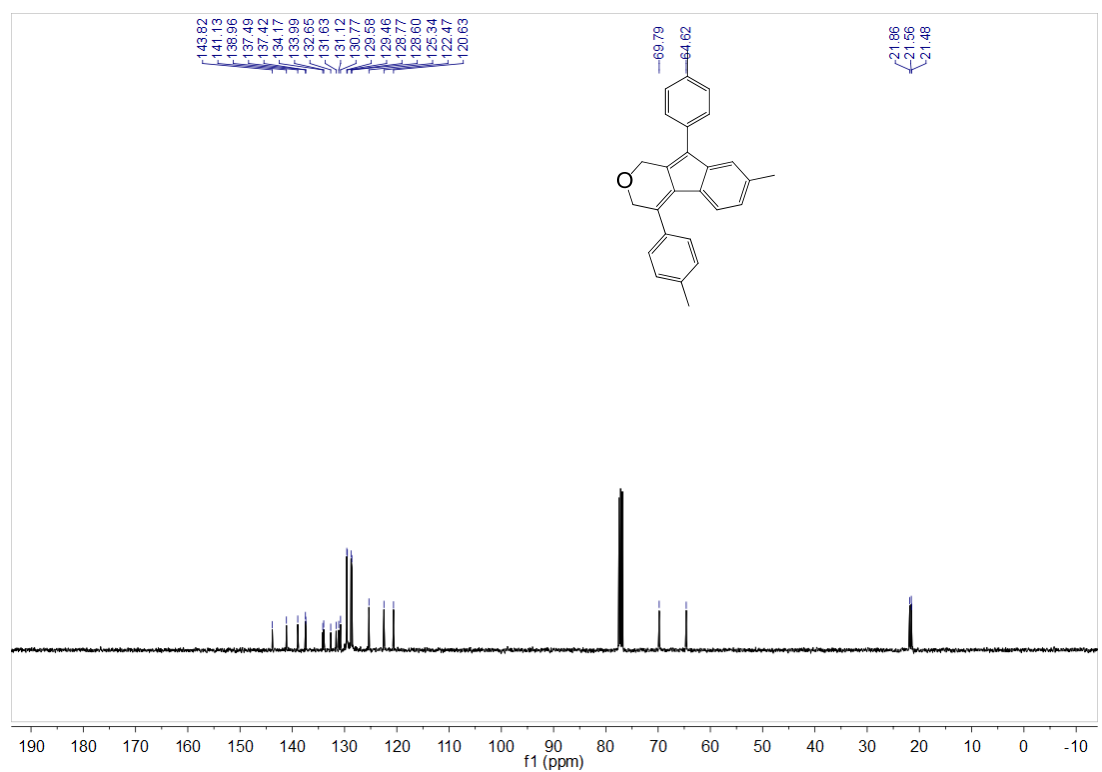

<sup>1</sup>H NMR (400 MHz, CDCl<sub>3</sub>) (up) and <sup>13</sup>C NMR (101 MHz, CDCl<sub>3</sub>) (down)

3ma

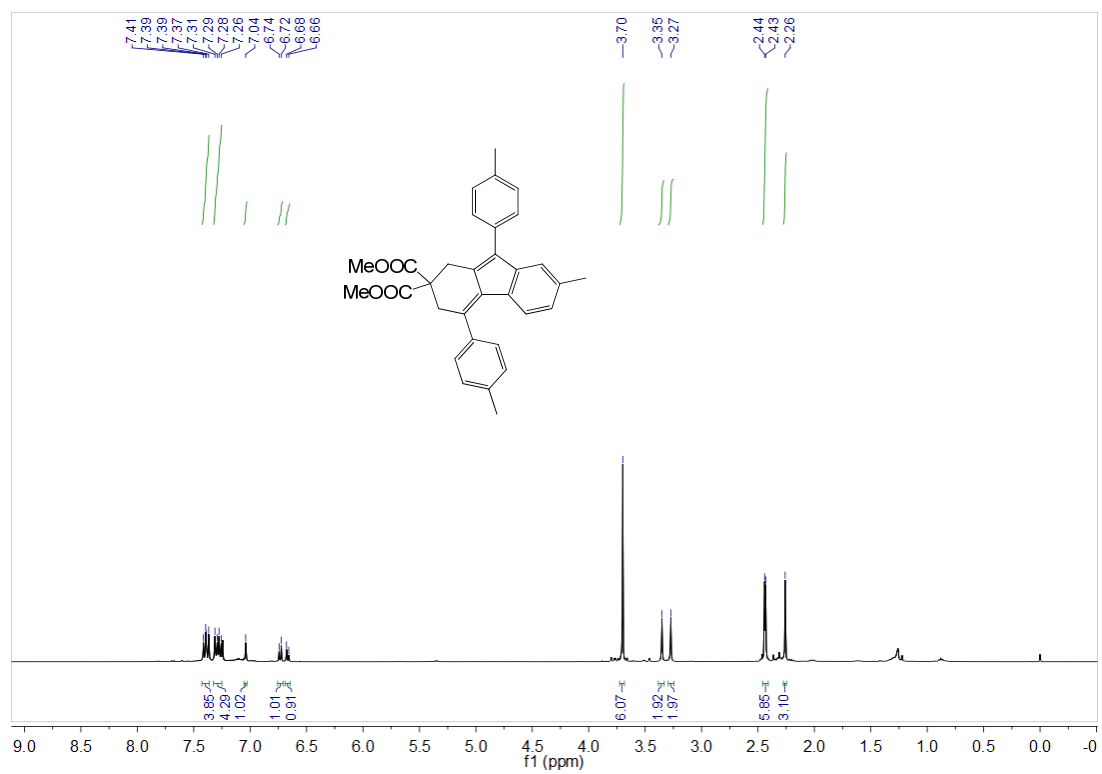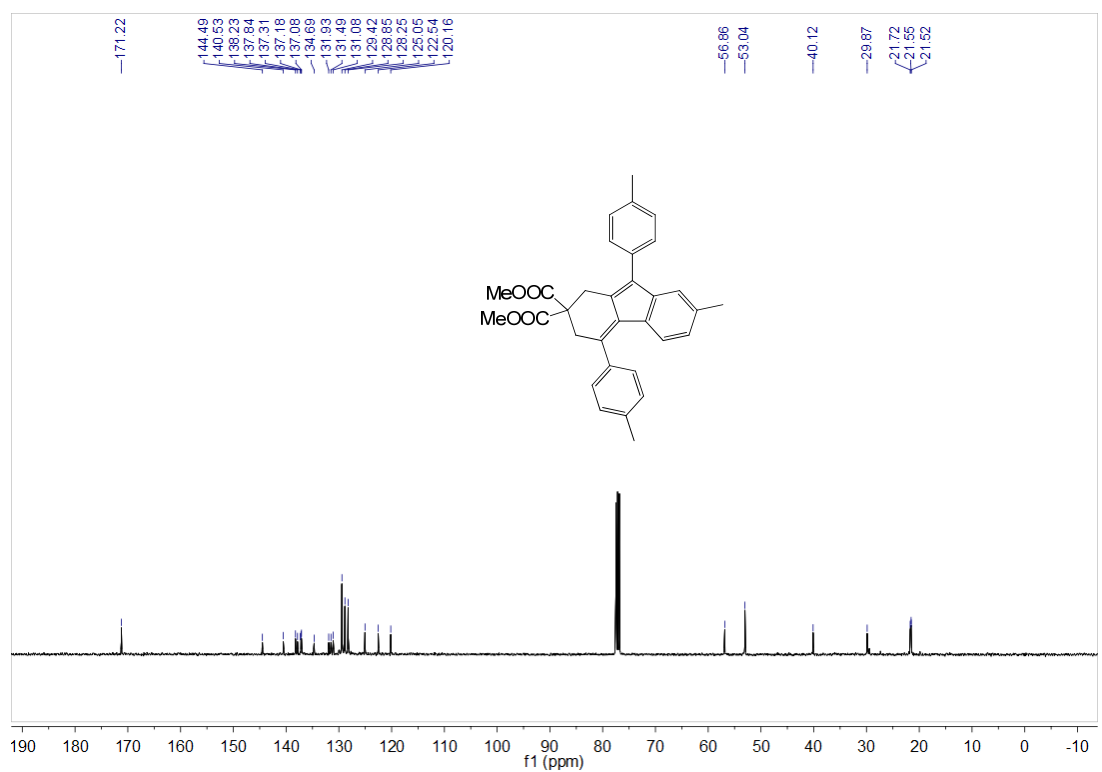

<sup>1</sup>H NMR (400 MHz, CDCl<sub>3</sub>) (up) and <sup>13</sup>C NMR (101 MHz, CDCl<sub>3</sub>) (down)

30a

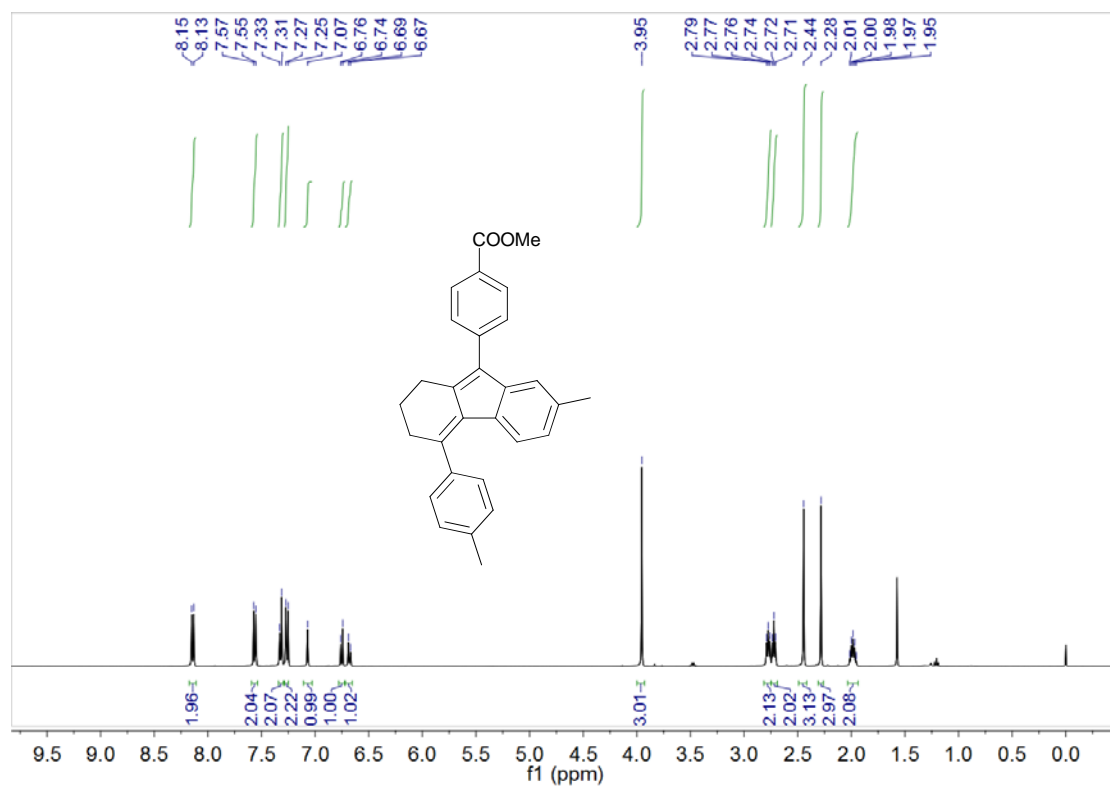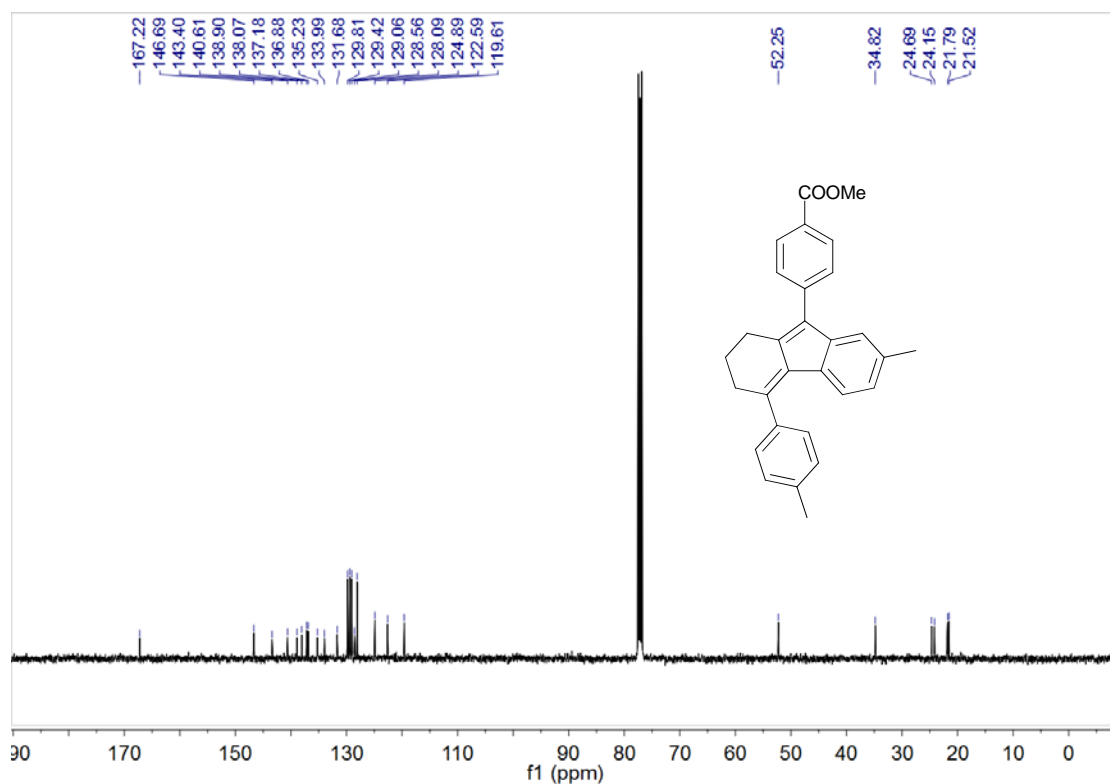

$^1\text{H}$  NMR (400 MHz,  $\text{CDCl}_3$ ) (up) and  $^{13}\text{C}$  NMR (101 MHz,  $\text{CDCl}_3$ ) (down)

4na

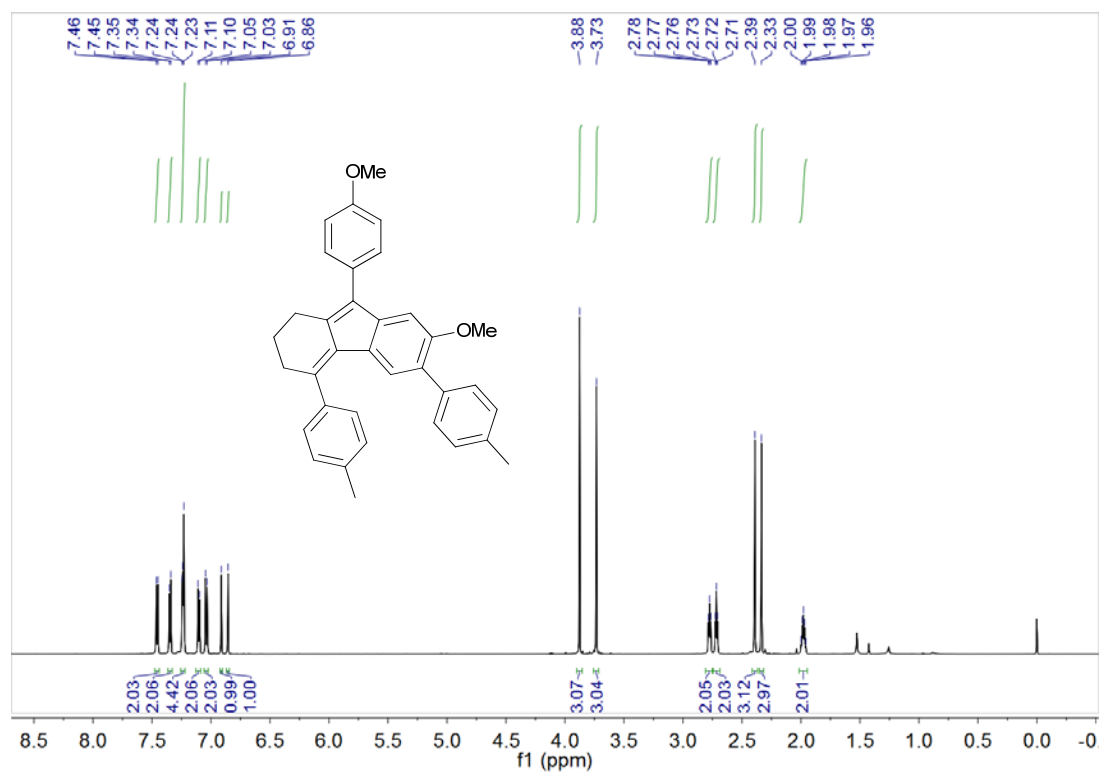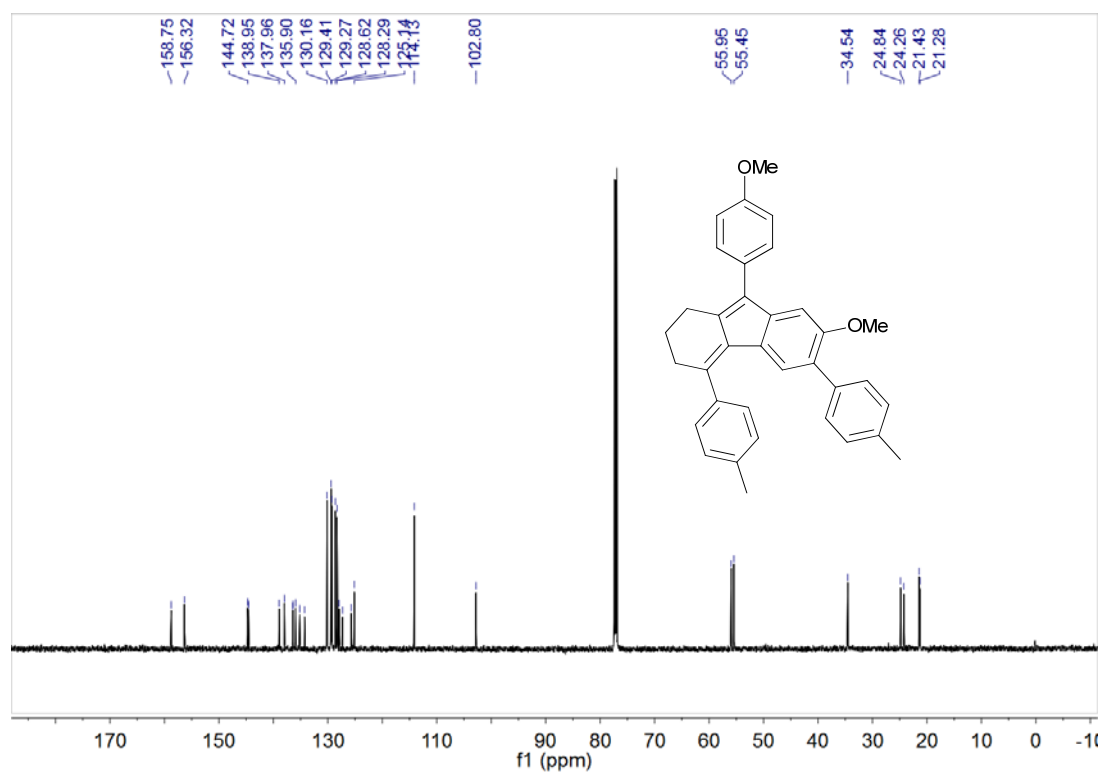

<sup>1</sup>H NMR (600 MHz, CDCl<sub>3</sub>) (up) and <sup>13</sup>C NMR (151 MHz, CDCl<sub>3</sub>) (down)

4ba

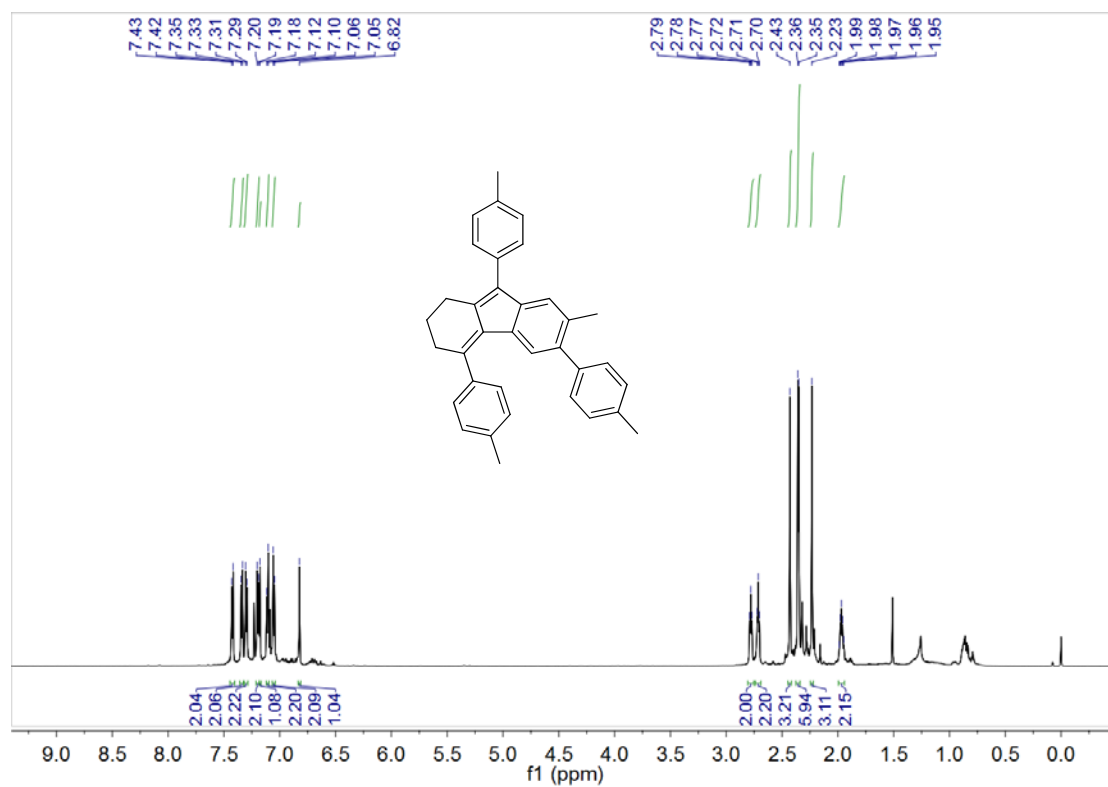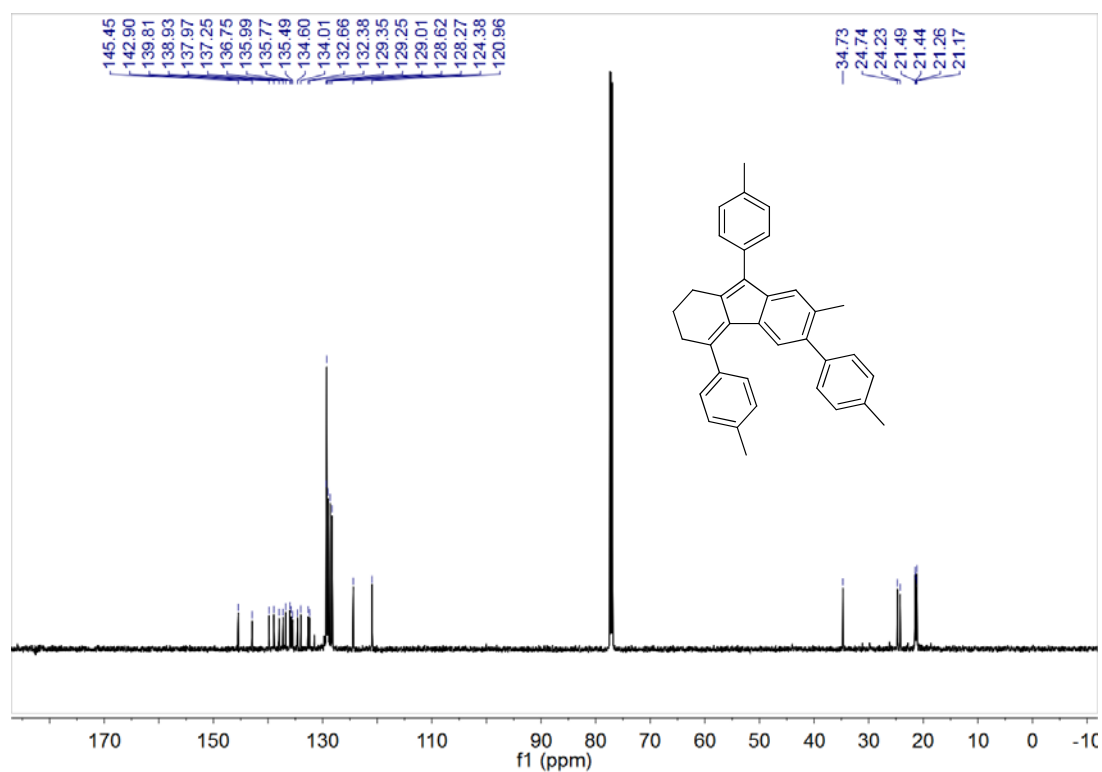

<sup>1</sup>H NMR (600 MHz, CDCl<sub>3</sub>) (up) and <sup>13</sup>C NMR (151 MHz, CDCl<sub>3</sub>) (down)

**4ba-600M-H-H-COSY**

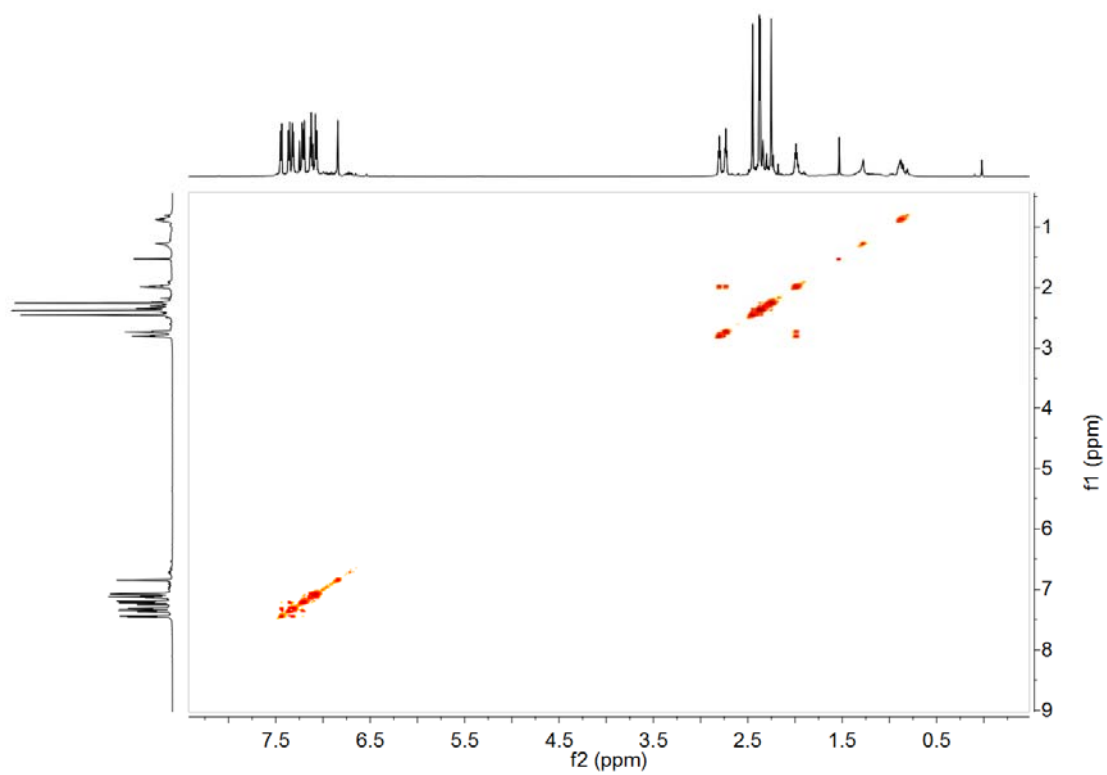

**4ba-600M-C-H-HMQC**

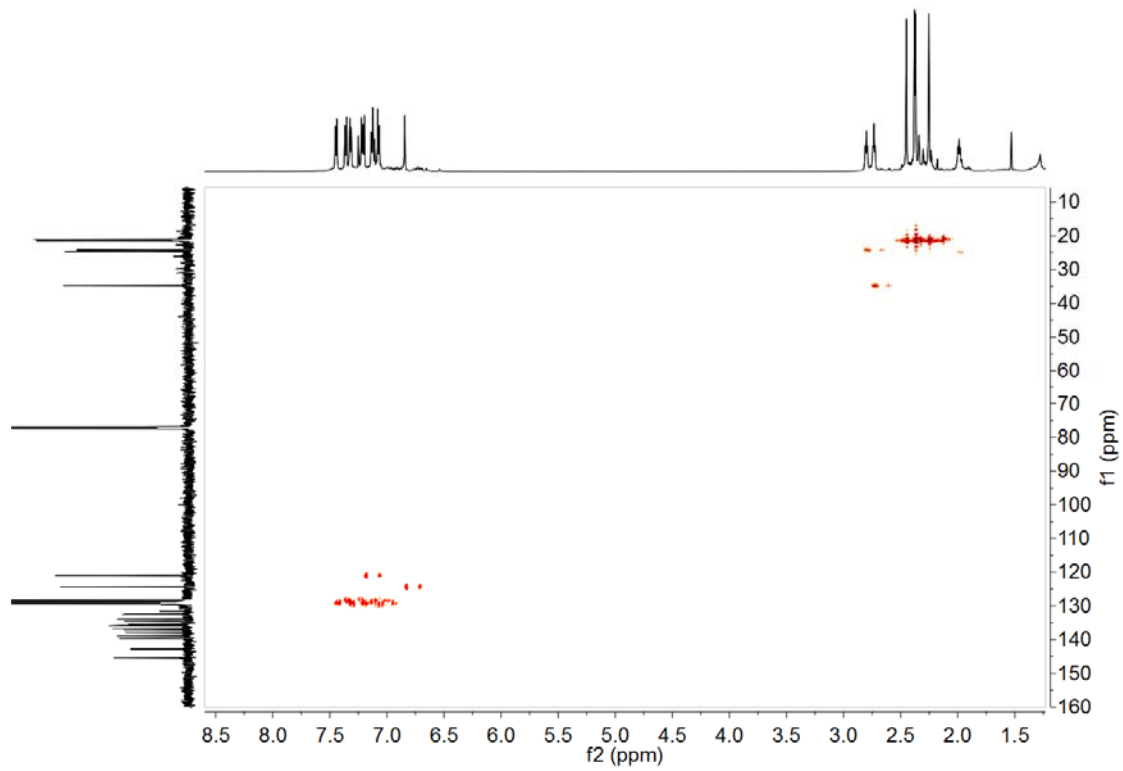



4ba-600M-C-H-HMBC

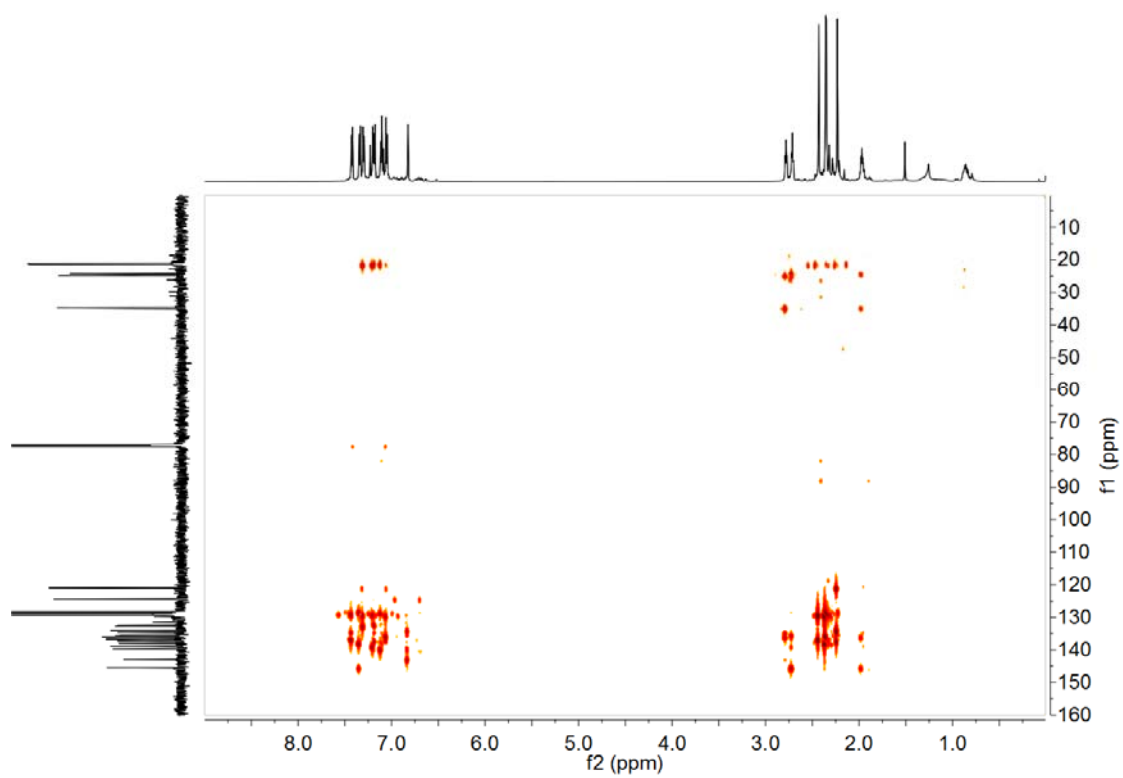

40a

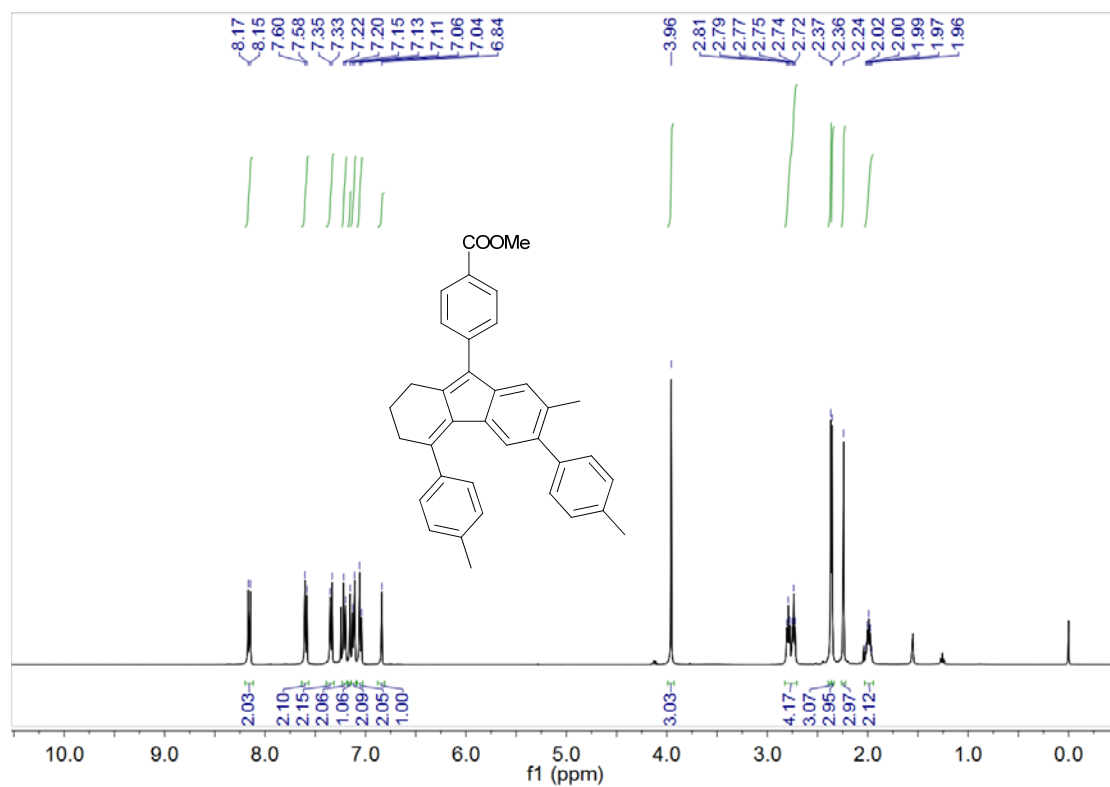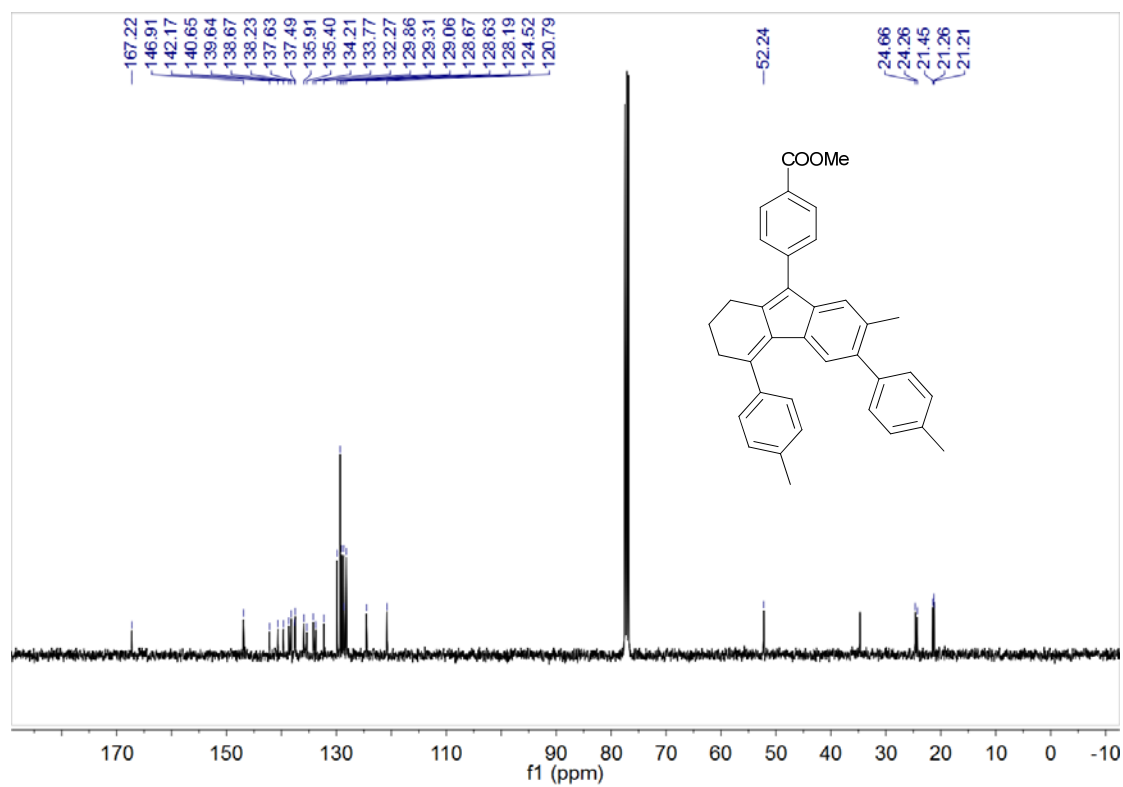

## 8. X-ray single crystallographic data of compound **3ae**

Single crystals suitable for X-ray analysis were obtained by slow evaporation of its solution in EA/ n-hexane. Formula:  $C_{28}H_{26}$ ,  $M = 362.20$ , yellow crystal,  $a = 20.325(14)$ ,  $b = 11.622(2)$ ,  $c = 8.5200(17)$  Å,  $\alpha = 90.00^\circ$ ,  $\beta = 90.00^\circ$ ,  $\gamma = 90.00^\circ$ ,  $V = 2012.6(7)$  Å<sup>3</sup>,  $\rho(\text{calcd}) = 1.196$  g/cm<sup>3</sup>,  $\mu = 0.067$  mm<sup>-1</sup>,  $Z = 4$ , Orthorhombic, space group  $Pc a 2_1$ ,  $\lambda = 0.71073$  Å,  $T = 173 \pm 2$  K. Theta (max) =  $27.4606^\circ$ ,  $R(\text{reflections}) = 0.0547(3962)$ ,  $wR2(\text{reflections}) = 0.1625(4122)$ . CCDC number: 1471734

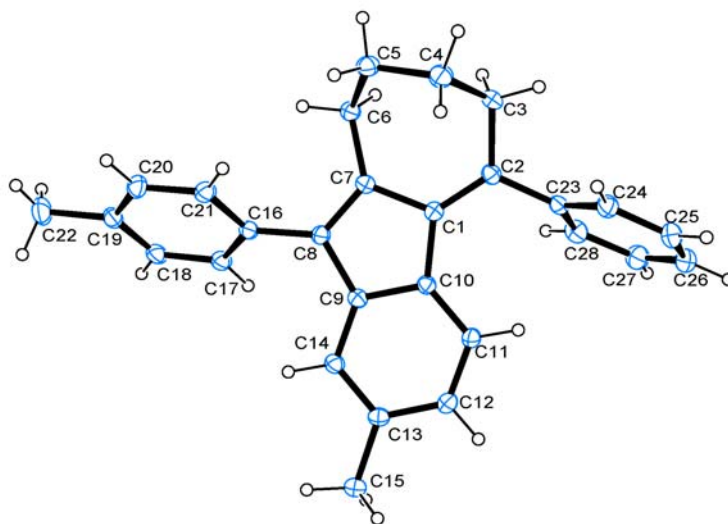

## 9. References

- 1 (a) C. Cheng, C. Chang, Y. Hsu, T. Lee, L. Chang, S. Liu and Y. Wu, *Eur. J. Org. Chem.*, 2010, 672. (b) M. K. Thorson, K. L. Klinkel, J. Wang and T. J. Williams, *Eur. J. Inorg. Chem.*, 2009, **2009**, 295.
- 2 B. M. Zhu and B. Olofsson, *Adv. Synth. Catal.*, 2007, **349**, 2610; M. Bielawski, D. Aili and B. Olofsson, *J. Org. Chem.*, 2008, **73**, 4602.
